# Supplementary material for: Desmopressin treatment combined with clotting factor VIII concentrates in patients with non-severe haemophilia A: protocol for a multicentre single-armed trial, the DAVID study
Source: PubMed Central journal article supplement (PMC6500101; doi:10.1136/bmjopen-2018-022719), 2019-04-23
Supplement: bmjopen-2018-022719.draft_revisions.pdf [file bmjopen-2018-022719.draft_revisions.pdf]

# BMJ Open

BMJ Open is committed to open peer review. As part of this commitment we make the peer review history of every article we publish publicly available.

When an article is published we post the peer reviewers' comments and the authors' responses online. We also post the versions of the paper that were used during peer review. These are the versions that the peer review comments apply to.

The versions of the paper that follow are the versions that were submitted during the peer review process. They are not the versions of record or the final published versions. They should not be cited or distributed as the published version of this manuscript.

BMJ Open is an open access journal and the full, final, typeset and author-corrected version of record of the manuscript is available on our site with no access controls, subscription charges or pay-per-view fees (<http://bmjopen.bmj.com>).

If you have any questions on BMJ Open's open peer review process please email [info.bmjopen@bmj.com](mailto:info.bmjopen@bmj.com)

# BMJ Open

## Desmopressin treatment combined with clotting factor VIII concentrates in patients with non-severe haemophilia A: a multicentre single-armed trial, the DAVID study

|                               |                                                                                                                                                                                                                                                                                                                                                                                                                                                                                                                                                                                                                                                                                                                                                                                                                                                                                                                                                                                                                                                       |
|-------------------------------|-------------------------------------------------------------------------------------------------------------------------------------------------------------------------------------------------------------------------------------------------------------------------------------------------------------------------------------------------------------------------------------------------------------------------------------------------------------------------------------------------------------------------------------------------------------------------------------------------------------------------------------------------------------------------------------------------------------------------------------------------------------------------------------------------------------------------------------------------------------------------------------------------------------------------------------------------------------------------------------------------------------------------------------------------------|
| Journal:                      | <i>BMJ Open</i>                                                                                                                                                                                                                                                                                                                                                                                                                                                                                                                                                                                                                                                                                                                                                                                                                                                                                                                                                                                                                                       |
| Manuscript ID                 | bmjopen-2018-022719                                                                                                                                                                                                                                                                                                                                                                                                                                                                                                                                                                                                                                                                                                                                                                                                                                                                                                                                                                                                                                   |
| Article Type:                 | Protocol                                                                                                                                                                                                                                                                                                                                                                                                                                                                                                                                                                                                                                                                                                                                                                                                                                                                                                                                                                                                                                              |
| Date Submitted by the Author: | 07-Mar-2018                                                                                                                                                                                                                                                                                                                                                                                                                                                                                                                                                                                                                                                                                                                                                                                                                                                                                                                                                                                                                                           |
| Complete List of Authors:     | Schütte, Lisette; Erasmus MC, Haematology<br>Cnossen, Marjon; Erasmus MC Sophia, Pediatric Hematology<br>Van Hest, Reinier; AMC, Hospital Pharmacy<br>Driessens, Mariette; Netherlands Haemophilia Patient Society<br>Fijnvandraat, Karin; Emma Kinderziekenhuis AMC, Pediatric Hematology;<br>Sanquin Research, Plasma Proteins<br>Polinder, Suzanne; Erasmus MC, Public Health<br>Beckers, Erik; Maastricht University Medical Centre, Haematology<br>Coppens, Michiel; Academic Medical Center, Vascular Medicine<br>Eikenboom, Jeroen; Leids Universitair Medisch Centrum, Thrombosis and Haemostasis<br>Laros-van Gorkom, Britta; Radboudumc, Haematology<br>Meijer, Karina; Universitair Medisch Centrum Groningen, Department of Haematology<br>Nieuwenhuizen, Laurens; Maxima Medisch Centrum, Haematology<br>Mauser-Bunschoten, Evelien; University Medical Centre Utrecht, Van Creveldclinic<br>Leebeek, Frank; Erasmus MC, Hematology<br>Mathôt, Ron; Academic Medical Center, Hospital Pharmacy<br>Kruip, Marieke; Erasmus MC, Hematology |
| Keywords:                     | Haemophilia A, Desmopressin, FVIII concentrate, SURGERY, Pharmacokinetic modelling                                                                                                                                                                                                                                                                                                                                                                                                                                                                                                                                                                                                                                                                                                                                                                                                                                                                                                                                                                    |
|                               |                                                                                                                                                                                                                                                                                                                                                                                                                                                                                                                                                                                                                                                                                                                                                                                                                                                                                                                                                                                                                                                       |

SCHOLARONE™  
Manuscripts

1  
2  
3 **Desmopressin treatment combined with clotting factor VIII concentrates in**  
4 **patients with non-severe haemophilia A: a multicentre single-armed trial, the**  
5 **DAVID study**  
6

7 L.M. Schütte<sup>1</sup>, M.H. Cnossen<sup>2</sup>, R.M. van Hest<sup>3</sup>, M.H.E. Driessens<sup>4</sup>, K. Fijnvandraat<sup>5</sup>, S.  
8 Polinder<sup>6</sup>, E.A.M. Beckers<sup>7</sup>, M. Coppens<sup>8</sup>, J. Eikenboom<sup>9</sup>, B.A.P. Laros-van Gorkom<sup>10</sup>, K.  
9 Meijer<sup>11</sup>, L. Nieuwenhuizen<sup>12</sup>, E.P. Mauser-Bunschoten<sup>13</sup>, F.W.G. Leebeek<sup>1</sup>, R.A.A. Mathôt<sup>3</sup>,  
10 M.J.H.A. Kruip<sup>1</sup>  
11  
12  
13

14  
15 Corresponding Author:

16 Dr. Marieke J.H.A. Kruip

17 Room Na-823

18 P.O. Box 2040

19 3000 CA Rotterdam

20 The Netherlands

21 e-mail: [m.kruip@erasmusmc.nl](mailto:m.kruip@erasmusmc.nl)

22 telephone number: +31 10 7033123  
23  
24  
25  
26  
27

28 Affiliations

29  
30 <sup>1</sup>Department of Haematology, Erasmus University Medical Centre, Rotterdam, the  
31 Netherlands; <sup>2</sup>Department of Paediatric Haematology, Erasmus University Medical Centre -  
32 Sophia Children's Hospital, Rotterdam, the Netherlands; <sup>3</sup>Department of Hospital Pharmacy,  
33 Academic Medical Centre, Amsterdam, the Netherlands; <sup>4</sup>Netherlands Haemophilia Patient  
34 Society, Nijkerk, the Netherlands; <sup>5</sup>Department of Paediatric Haematology, Academic  
35 Medical Centre, Amsterdam, The Netherlands; Department of Plasma Proteins, Sanquin  
36 Research, Amsterdam, The Netherlands; <sup>6</sup>Department of Public Health, Erasmus University  
37 Medical Centre, Rotterdam, the Netherlands; <sup>7</sup>Department of Haematology, Maastricht  
38 University Medical Centre, Maastricht, the Netherlands; <sup>8</sup>Department of Vascular Medicine,  
39 Academic Medical Centre, Amsterdam, the Netherlands; <sup>9</sup>Department of Thrombosis and  
40 Haemostasis, Leiden University Medical Centre, Leiden, the Netherlands; <sup>10</sup>Department of  
41 Haematology, Radboud University Medical Centre, Nijmegen, the Netherlands; <sup>11</sup>Department  
42 of Haematology, University Medical Centre Groningen, Groningen, the Netherlands;  
43 <sup>12</sup>Department of Haematology, Maxima Medical Centre, Eindhoven, the Netherlands; <sup>13</sup>Van  
44 Creveldkliniek, Utrecht, the Netherlands  
45  
46  
47  
48  
49  
50  
51  
52

53 Word count: 3391  
54  
55  
56  
57  
58  
59  
60

## Abstract

### Introduction:

Haemophilia A is an inherited bleeding disorder characterised by factor VIII (FVIII) deficiency. In non-severe haemophilia A patients, surgery and bleeding are the main indications for treatment with FVIII concentrate. A recent study reported that standard dosing frequently results in FVIII levels (FVIII:C) below or above FVIII target ranges, leading to respectively a bleeding risk or excessive costs. In addition, FVIII concentrate treatment carries a risk of development of neutralizing antibodies.

An alternative is desmopressin, which releases endogenous FVIII and von Willebrand factor. In most non-severe haemophilia A patients, desmopressin alone is not enough to achieve FVIII target levels during surgery or bleeding. We hypothesize that combined pharmacokinetic (PK) guided administration of desmopressin and FVIII concentrate may improve dosing accuracy and reduces FVIII concentrate consumption.

### Methods and analysis:

In the DAVID study, fifty non-severe haemophilia A patients (FVIII:C  $\geq 0.01$  IU/ml) with a bleeding episode or undergoing surgery will receive desmopressin and FVIII concentrate combination treatment. The necessary dose of FVIII concentrate to reach FVIII target levels after desmopressin administration, will be calculated with a population PK model. The primary endpoint is the proportion of patients reaching FVIII target levels during the first 72 hours after start of the combination treatment. This approach was successfully tested in one pilot patient who received perioperative combination treatment.

### Ethics and dissemination:

The DAVID study was approved by the medical ethics committee of the Erasmus MC. Results of the study will be communicated through publication in international scientific journals and presentation at (inter)national conferences.

Trial registration: NTR5383 ([www.trialregister.nl](http://www.trialregister.nl))

**Strengths and limitations of this study**

- The DAVID-study is a multicentre, prospective trial including patients from all Haemophilia Treatment Centres in the Netherlands.
- Desmopressin and FVIII concentrate combination treatment is an innovative treatment option for non-severe haemophilia A patients.
- By using population pharmacokinetic modelling the dosing of FVIII concentrate may be improved, with less FVIII levels above and below target.
- The DAVID study is a single-armed trial.
- The study population is heterogeneous as all types of surgery and bleeding episodes may be included.

## Introduction

Haemophilia A is an X-linked bleeding disorder characterized by a factor VIII (FVIII) deficiency. Non-severe haemophilia A patients (FVIII:C  $\geq$  0.01-0.40 IU/ml) suffer from bleeding in the perioperative setting and after (minor) trauma. Treatment consists of either desmopressin or FVIII concentrate.

FVIII concentrate is an effective, but expensive treatment option. With current dosing based on body weight, baseline FVIII:C and target FVIII:C, FVIII:C both below (7-45%) and above FVIII (32-81%) target levels have been observed.<sup>1-3</sup> FVIII:C below target may lead to an increased bleeding risk, whereas levels above target increase the costs. Excessively high FVIII:C may also be associated with thrombosis.<sup>4-6</sup> In addition, high FVIII concentrate doses may induce the development of FVIII neutralizing antibodies, causing ineffectiveness of treatment with FVIII concentrate. In cases where antibodies cross-react with patient's endogenous FVIII they can even cause a severe phenotype with spontaneous bleeding.<sup>7-9</sup> Therefore, dosing within the target range with restriction of FVIII concentrate use is important.

An alternative to FVIII concentrate is desmopressin, a synthetic analogue of vasopressin. It releases von Willebrand factor (VWF) and FVIII from the endothelium and thereby improves haemostasis.<sup>10-12</sup> Although treatment is often effective, FVIII:C response to desmopressin exhibits a high variability between haemophilia A patients. Contributing factors reported in literature are age, baseline FVIII:C and the *F8*-gene mutation.<sup>13-15</sup> However, these factors do not explain the observed variability entirely. In addition, in most patients FVIII:C does not increase sufficiently to prevent perioperative bleeding.

Other limitations of desmopressin are the experienced side effects and tachyphylaxis. Most side effects are mild and transient, such as vasodilation. More severe side-effects like hyponatremia are rare and can usually be prevented by a fluid restriction.<sup>16</sup> Tachyphylaxis occurs when repeated dosages of desmopressin are given with short time intervals (12-24 hours). The decrease in FVIII:C response is approximately 30% from the second dose onwards and is believed to be caused by a temporary depletion of VWF and FVIII from the endothelium.<sup>17</sup>

Combined administration of desmopressin and FVIII concentrate may be able to overcome several of the drawbacks of both separate treatment options. However, there is a lack of experience and knowledge with regard to the efficacy and safety of combination treatment. Moreover, optimization of dosing is necessary to get and keep FVIII:C within the target range.

A valuable approach could be pharmacokinetic (PK) guided dosing, where FVIII:C responses of future dosages are predicted based on a population pharmacokinetic model in combination with a limited number (2-3) of FVIII:C measurements, obtained after

1  
2  
3 administration of desmopressin and/or FVIII concentrate. This technique was previously  
4 shown to be effective in both the prophylactic and perioperative setting in severe and  
5 moderate haemophilia A patients.<sup>18-21</sup>  
6

7 Therefore, we hypothesize that combined PK guided dosing of desmopressin and FVIII  
8 concentrate may be a feasible treatment option in non-severe haemophilia A patients with a  
9 bleeding episode or undergoing surgery. We aim to prove that the proportion of patients with  
10 FVIII:C within the FVIII target ranges can be increased by the use of the combination  
11 treatment and PK-guided dosing. In addition, the consumption of FVIII concentrate will be  
12 reduced. This innovative approach in haemophilia treatment may be a promising alternative  
13 with an increase in quality of care and a concomitant cost reduction.  
14  
15  
16  
17  
18

## 19 **Methods and analysis**

### 20 Objectives

21 The primary objective of the DAVID study is to evaluate if combination treatment of  
22 desmopressin and PK-guided dosing of FVIII concentrate is able to increase the proportion  
23 of non-severe haemophilia A patients with FVIII:C within the target range during the first 72  
24 hours after start of combination treatment compared to historical controls.  
25  
26  
27  
28

### 29 *Secondary objectives:*

- 30 1. To assess FVIII concentrate consumption in all patients.
- 31 2. To establish (possible) adverse events of combination treatment; e.g. side  
32 effects of desmopressin, bleeding episodes, development of neutralizing  
33 antibodies, and thrombotic events.
- 34 3. To evaluate the extent of tachyphylaxis after desmopressin treatment.
- 35 4. To perform an economical evaluation to quantify the potential cost reduction of  
36 the combination treatment.
- 37 5. To evaluate the experienced quality of patient care.  
38  
39  
40  
41  
42  
43

### 44 Design

45 The DAVID study is a multicentre single-arm trial in non-severe haemophilia A patients with a  
46 bleeding episode or if they need a surgical procedure. Patients will receive combination  
47 treatment of desmopressin and FVIII concentrate instead of the conventional treatment which  
48 consists of FVIII concentrate monotherapy.  
49  
50  
51  
52

### 53 Patient selection

54 Non-severe haemophilia A patients  $\geq 12$  years of age with a bleeding episode or undergoing  
55 a surgical procedure, requiring FVIII replacement therapy and having a sufficient response to  
56  
57  
58  
59

desmopressin, will be included. Patients will be recruited from one of the haemophilia treatment centres in the Netherlands: Erasmus University Medical Centre Rotterdam, Academic Medical Centre Amsterdam, Leiden University Medical Centre, University Medical Centre Groningen, Radboud university medical centre Nijmegen, University Medical Centre Utrecht, Maxima Medical Centre Eindhoven and Maastricht University Medical Centre.

*Inclusion criteria:*

- Non-severe haemophilia A patients (FVIII:C  $\geq 0.01$  IU/ml)
- Requiring a surgical procedure or having a bleeding episode
- Requiring replacement therapy with FVIII concentrate for at least 48 hours
- Age between 12 and 70 years at study inclusion date
- (Parental) informed consent
- Results of a desmopressin test available (minimal absolute FVIII:C increase  $> 0.2$  IU/ml)

*Exclusion criteria:*

- Patients with other congenital or acquired haemostatic abnormalities
- Inadequate response to desmopressin (absolute increase in FVIII:C  $< 0.2$  IU/ml) during a previous desmopressin test
- FVIII neutralizing antibodies (in medical history), unless successfully treated with immunotolerance induction therapy
- Initiation of FVIII concentrate treatment  $> 24$  hours before study inclusion
- Patients not eligible for desmopressin treatment due to contraindications, e.g.: intolerance, interactions with co-medication or due to type of surgery

Interventions and study procedures

All patients will receive combination treatment of desmopressin and FVIII concentrate during a bleeding episode or in the perioperative setting for at least 48 hours. All patients will receive a standard dose of desmopressin intravenously ( $0.3 \mu\text{g}/\text{kg}$ ; no maximum dose). In order to combine both medication regimens, an individualized dosing advice for FVIII concentrate will be provided by the clinical pharmacologist. The initial dosing advice will be based on the FVIII:C response observed after a test administration of desmopressin (see below) and previously collected patient and population pharmacokinetic data after administration of desmopressin (endogenous FVIII) and FVIII concentrate (exogenous FVIII). The treating physician states the duration of combination treatment, the mode of administration of FVIII concentrate (continuous or intermittent administration) and determines FVIII target ranges. During combination treatment FVIII:C will be assessed regularly. Accordingly dose adjustments for FVIII concentrate will be made iteratively based on the



1  
2  
3 results of a desmopressin test administration and using Bayesian analysis. Bayesian  
4 analysis will be performed with the NONMEM® software using a dedicated integrated  
5 population model describing the PK of FVIII following both the administration of  
6 desmopressin and FVIII concentrate. As bleeding or acute surgery calls for immediate  
7 treatment and constructing a dosing advice takes time, a patient may be included in the  
8 DAVID-study until 24 hours after the start of FVIII concentrate monotherapy.  
9  
10  
11  
12

### 13 *Desmopressin test administration*

14 All patients must have undergone a desmopressin test with at least three FVIII:C  
15 measurements. If performed during childhood (<18 years), the test is only admissible when  
16 performed  $\leq 4$  years before study inclusion. When no desmopressin test has been performed  
17 meeting our criteria, the test should be performed with a standard intravenous desmopressin  
18 dose of 0.3  $\mu\text{g}/\text{kg}$  infused over 30 minutes with a minimum of three FVIII:C measurements:  
19 before the administration of desmopressin, 1 hour after desmopressin administration for peak  
20 measurement and at least one sample thereafter, for example after 4 hours. All time points of  
21 blood sampling and end of desmopressin administration should be documented precisely, as  
22 well as exact desmopressin dose and duration of infusion.  
23  
24  
25  
26  
27  
28

### 29 *Pharmacokinetic (PK) guided dosing*

30  
31 In order to provide an individualized dosing advice, a Bayesian analysis will be performed on  
32 the basis of an integrated population PK model. This population model has been constructed  
33 based on both endogenous FVIII:C after desmopressin administration and exogenous  
34 FVIII:C after FVIII concentrate administration. The population model describes the average  
35 PK, including the variability of the FVIII:C response between and within patients following  
36 both the administration of desmopressin and the administration of FVIII concentrate. The  
37 individualized advice for the first dose of FVIII concentrate will be provided based on this  
38 model along with the results of the desmopressin test administration and the perioperative  
39 FVIII target levels. Further dosing of FVIII concentrates will be adjusted daily by iterative  
40 Bayesian analysis. In this analysis the following information will be included: 1) FVIII release  
41 in response to desmopressin after the test dose 2) baseline FVIII:C and 3) measured FVIII:C  
42 (both trough and peak levels)(figure 1 and table 1). Dose adjustments based on this iterative  
43 Bayesian analysis will be performed in NONMEM® software. All dosing advices will be  
44 given one day in advance.  
45  
46  
47  
48  
49  
50  
51  
52

### 53 *Experienced quality of patient care*

54 To assess experienced quality of care during this innovative intervention, two questionnaires  
55 will be given to the patients. Side effects will be assessed using the questionnaire previously  
56  
57  
58  
59  
60

1  
2  
3 developed and used by Stoof et al.<sup>16</sup> This questionnaire includes the occurrence of ten  
4 different self-reported side effects on a five-point scale. Side effects will be evaluated at two  
5 time points: before surgery and three days after surgery. In the second questionnaire (three  
6 days after surgery) experienced quality of care will be evaluated with the addition of three  
7 questions dedicated to desmopressin and FVIII concentrate combination treatment. Patients  
8 will report their satisfaction with the combination treatment on a scale of 1 to 100. They will  
9 have the opportunity to explain what is needed to improve the given grade. Finally, they can  
10 state their preference for one of the treatment options: FVIII concentrate monotherapy or  
11 combination treatment.  
12  
13  
14  
15

### 16 17 Sample size

18 In the DAVID study, the proportion of patients that reach FVIII target levels with combination  
19 treatment in the first 72 hours postoperatively (without adding off-protocol FVIII concentrates)  
20 will be assessed. Historical data on current FVIII treatment show a proportion of 0.3 of non-  
21 severe haemophilia A patients with FVIII:C within target ranges in this time period.<sup>3</sup> A  
22 doubling of this proportion, leading to a proportion of patients of 0.6, is believed to be  
23 clinically relevant. To study this with a power of 90% and a two-sided significance level of  
24 0.05, a sample size of minimally 25 patients is needed. In order to allow for dropouts and to  
25 overcome the heterogeneity within our study population, we aim to include 50 patients.  
26  
27  
28  
29  
30  
31

### 32 Outcome measures

#### 33 *Primary outcome:*

34 The proportion of patients with FVIII trough levels within the FVIII target range during the first  
35 72 hours after start of combination treatment. If a patient has one trough level outside the  
36 target range or needs off-protocol FVIII concentrate within the first 72 hours of combination  
37 the treatment, the primary endpoint is not reached in that patient. Off-protocol FVIII  
38 concentrate is defined as all administered FVIII concentrate outside the PK-guided dosing  
39 advice as given by the clinical pharmacologist. FVIII:C will be targeted according to the Dutch  
40 Treatment Guideline (Table 2).<sup>17</sup> The treating physician may deviate from the guideline and  
41 set different target ranges, based on bleeding phenotype/history or type of surgery.  
42  
43  
44  
45  
46  
47  
48

#### 49 *Secondary outcomes:*

- 50 - FVIII concentrate consumption, expressed as the total amount of administered units  
51 of FVIII concentrate per kilogram per patient;
  - 52 - Number and nature of adverse events during combined treatment;
  - 53 - Incidence and severity of bleeding, where the severity of bleeding will be graded  
54 according to the ISTH criteria for major and minor bleeding;<sup>22 23</sup>
- 55  
56  
57  
58  
59  
60

- 1
- 2
- 3 - Incidence of FVIII neutralizing antibodies;
- 4 - Incidence of thrombosis, where thrombosis will be defined according to the Dutch
- 5 guidelines on thrombosis, myocardial infarctions and strokes,<sup>24 25</sup>
- 6
- 7 - Incidence and extent of tachyphylaxis, defined as a reduction in the absolute increase
- 8 in FVIII:C after the second and third desmopressin infusion;
- 9
- 10 - Medical costs and an economic evaluation;
- 11
- 12 - Experience quality of patient care, measured by a questionnaire
- 13

### 14 Data analysis plan

15 All baseline characteristics will be described as means and standard deviations or medians  
16 with interquartile ranges, dependent on whether the parameter is normally distributed. The  
17 primary outcome, the proportion of patients within FVIII target ranges, will be analysed by a  
18 chi-square test. Retrospective data will be used as a reference, as the DAVID-study only has  
19 one study arm.<sup>3</sup> Pharmacokinetic data will be analysed using the NONMEM® software  
20 package. Tachyphylaxis of FVIII:C response to desmopressin will be analysed with a paired  
21 t-test. Other secondary outcomes will be documented in a descriptive manner, except for the  
22 economic analysis.  
23  
24  
25  
26  
27  
28

### 29 *Economic analysis*

30 An economic evaluation will be performed from a health care perspective from the day of  
31 surgery to 90 days postoperatively. The cost-effectiveness of combined treatment will be  
32 assessed by calculating the incremental cost-effectiveness ratio (ICER), defined as the  
33 difference in costs of combined treatment, compared to usual care, divided by the average  
34 change in effectiveness. Actual medical costs will be calculated by multiplying the volumes  
35 of healthcare use with the corresponding unit prices. Perioperative data resource use  
36 (desmopressin, FVIII concentrates, additional FVIII:C and VWF measurements, PK-profiling)  
37 will be collected from medical files. Usual medical costs (to compare to combination  
38 treatment costs) will be calculated based on a treatment protocol as it would have been  
39 without desmopressin use, taking into account patient's body weight, baseline FVIII:C and  
40 type of surgery. The reduction in costs will be represented by the usual medical costs (units  
41 of FVIII concentrates) minus the actual medical costs for combined treatment (units of FVIII  
42 concentrates, µg of desmopressin, extra FVIII:C measurements). An additional sensitivity  
43 analysis will be performed to assess the stability of the results to changes in costs and  
44 effectiveness parameters. Primary effectiveness parameter is the proportion of patients  
45 reaching FVIII target levels with desmopressin and FVIII concentrate combination treatment.  
46 Secondary effectiveness parameter is the frequency of adverse events during combination  
47 treatment.  
48  
49  
50  
51  
52  
53  
54  
55  
56  
57  
58  
59  
60

### Patient and Public Involvement

During the development of this study we worked closely together with the Netherlands Haemophilia Patient Society (NVHP). One representative of the NVHP is member of the project committee and helped us with the study design. Moreover, 5 members of the NVHP were invited to comment on the patient information. The design and information were adjusted according to their opinions and questions. The final results of the DAVID study will be communicated through scientific international journals and at international conferences. One major conference may be that of the World Federation of Haemophilia, attended by both physicians, researchers and patients from all over the world. In addition, the results will be communicated in the magazine of the NVHP. Finally, results will also be implemented in the treatment guidelines and patient information will be adjusted accordingly.

### Proof of concept

As a proof of concept, one patient was treated with desmopressin and FVIII concentrate combination treatment for the duration of 24 hours. The patient was a 53 year old male with moderate severe haemophilia A (FVIII:C 0.04 IU/ml). His body weight was 100 Kg. He was in need of dental surgery and needed treatment to prevent bleeding. He received an infusion of desmopressin (0.3 µg/kg) over 30 minutes, followed 30 minutes later by FVIII concentrate in a dose of 25 IU/kg (2500 IU). He received a second dose of FVIII concentrate (20 IU/kg; i.e. 2000 IU) in the evening to maintain his FVIII:C above target values. FVIII concentrate dosages were determined using the PK model and based on the patient's response to a previous desmopressin dose and a previous FVIII concentrate administration. Figure 2 shows the measured FVIII:C and the FVIII:C as predicted by the integrated PK model. The measured FVIII:C trough level and peak levels were within 10% of the predicted levels (Figure 2). The patient did not suffer from any other than mild side effects of desmopressin, e.g. flushing and mild tachycardia (101 bpm). To prevent bleeding, he was also treated with tranexamic acid for multiple days. No bleeding was reported before and after the surgery. However, because of a possible infection of the wound he was treated with antibiotics.

### **Ethics and dissemination**

The study was approved by the Medical Ethics Committee of the Erasmus University Medical Centre Rotterdam, the Netherlands. The study will be conducted according to GCP guidelines and the Declaration of Helsinki. Results of the study will be communicated to the (inter)national medical and scientific community through publication in high-ranking peer reviewed international journals and at (inter)national medical scientific conferences. Results of the study will also be implemented in the Dutch Haemophilia Treatment Guidelines.

1  
2  
3 Hopefully the international society of Haemophilia Treatment Centres will adapt the results in  
4 their guidelines as well.  
5

### 6 7 **Registration**

8 The trial is registered in the Dutch Trial Registry, number NTR5383 ([www.trialregister.nl](http://www.trialregister.nl)).  
9

### 10 11 **Discussion**

12 This prospective trial will allow us to evaluate the safety and efficacy of combination  
13 treatment of desmopressin and FVIII concentrate in reaching target FVIII:C during bleeding  
14 episodes and in the perioperative setting. Dosing of FVIII concentrate will be determined by  
15 an integrated population PK model developed specifically for non-severe haemophilia A  
16 patients to be treated with combination treatment. Fifty non-severe haemophilia A patients  
17 will be included from all haemophilia treatment centres in the Netherlands to reach our aim.  
18

19 The DAVID study has some limitations. First, this study is not designed as a randomized  
20 controlled trial; it does not include a control group. Therefore, no direct comparison to  
21 standard treatment will be possible. However, we performed an extensive retrospective  
22 cohort study to determine the effectiveness of current clinical practice in which 37 patients  
23 undergoing 52 surgeries, were evaluated.<sup>3</sup> Moreover, the amount of FVIII concentrate that  
24 would have been administered to the patients included in the DAVID study as if  
25 desmopressin was not administered and as if no PK-guided dosing was applied, will be  
26 calculated.  
27

28 The second limitation is the heterogeneity of the study population. All types of surgery,  
29 unless not compatible with desmopressin treatment, may be included in the study. To limit  
30 the effects of this heterogeneity, only patients with an expected treatment duration of at least  
31 48 hours will be included. Moreover, the data that were used to develop the integrated  
32 population PK model also included data from various types of surgery.  
33

### 34 35 **Conclusion**

36 In the DAVID study, efficacy and safety of desmopressin and FVIII concentrate combination  
37 treatment in non-severe haemophilia A patients will be determined. Using this innovative  
38 approach treatment of non-severe haemophilia A patients both during bleeding episodes and  
39 in the perioperative setting may be improved.  
40  
41  
42  
43  
44  
45  
46  
47  
48  
49  
50  
51  
52  
53  
54  
55  
56  
57  
58  
59  
60

### Authors' contribution

MK, MCn, FL and RM designed the study and critically revised the manuscript. LS, SP and RH wrote the manuscript and refined the study design. MD, KF, EB, MCo, JE, BL-G, KM, LN and EM critically revised the manuscript and refined the study design.

We would like to specially thank MD for her contribution on behalf of the NVHP and the five NVHP members who helped to improve the patient information. In addition we would like to thank the pilot patient for his cooperation and for letting us use his case as an example.

### Funding statement

This work was supported by ZonMw, (grant number 836031003), the Dutch organisation for Health Research and Development.

### Competing interest statement

L.M. Schütte; received reimbursement from CSL-Behring for attending a symposium, not related to this study.

M.H. Cnossen; received unrestricted research/educational funding for various projects as well as travel fees from the following institutions and companies: ZonMW, Innovatiefonds, Pfizer, Baxalta/Shire, Bayer Schering Pharma, Novo Nordisk, Novartis, Roche and CSL Behring, all not related to this study.

R.M. van Hest, E.A.M. Beckers, M. Coppens, M. Driessens, L. Nieuwenhuizen, S.Polinder: nothing to disclose relevant to the DAVID study.

K. Fijnvandraat: is a member of the European Hemophilia Treatment and Standardization Board sponsored by Baxter, has received unrestricted research grants from CSL Behring and Bayer, and has given lectures at educational symposiums organized by Pfizer, Bayer and Baxter.

J. Eikenboom: received research funding from CSL Behring and honorarium for educational activity from Roche, not related to this study.

B.A.P. Laros-van Gorkom: received unrestricted educational grants from Baxter and CSL Behring, and speaker fees from Sanquin.

K. Meijer: research support from Bayer, Sanquin and Pfizer; speaker fees from Bayer, Sanquin, Boehringer Ingelheim, BMS and Aspen; consulting fees from Uniqure, not related to this study

F.W.G. Leebeek; received unrestricted research grants from CSL-Behring and Baxalta/Shire not related to this study. He is consultant for Shire, NovoNordisk and UniQure. Fees go to the university.

R.A.A. Mathôt: received personal fees from Merck Sharp & Dohme and Zeria and grants from Bayer, UCB Pharma and Hoffman La Roche with no involvement in this study.



1  
2  
3 M.J.H.A.Kruip; received unrestricted research grants from Pfizer, Innovatiefonds and Ferring  
4 with no involvement in this study.  
5  
6

## 7 References

- 8 1. Hazendonk HC, Lock J, Mathot RA, et al. Under dosing and overdosing of factor VIII in the  
9 perioperative setting in haemophilia a: A need for optimization of dosing. *Haemophilia*  
10 2015;**21**((Hazendonk H.C.; Lock J.; Bouzariouh H.; Cnossen M.H.) Department of  
11 Pediatric Hematology, Erasmus University Medical Centre, Sophia Childrens  
12 Hospital, Rotterdam, Netherlands):81-82.
- 13 2. Hazendonk HC, Lock J, Mathot RA, et al. Perioperative treatment of hemophilia A  
14 patients: blood group O patients are at risk of bleeding complications. *J Thromb*  
15 *Haemost* 2016;**14**(3):468-78.
- 16 3. Schütte LM, de Rooij N, Hazendonk HCAM, et al. Perioperative FVIII Concentrate  
17 Treatment in Mild Hemophilia a Patients Shows a High Rate of Overdosing -  
18 David/Opti-Clot Studies. *Blood* 2015;**126**(23):3510-10.
- 19 4. Ritchie B, Woodman RC, Poon MC. Deep venous thrombosis in hemophilia A. *Am J Med*  
20 1992;**93**(6):699-700.
- 21 5. Escuriola Ettingshausen C, Martinez Sagner I, Kreuz W. Portal vein thrombosis in a  
22 patient with severe haemophilia A and F V G1691A mutation during continuous  
23 infusion of F VIII after intramural jejunal bleeding - Successful thrombolysis under  
24 heparin therapy. *European Journal of Pediatrics, Supplement* 1999;**158**(3):S180-S82.
- 25 6. Russell Z, Riconda D, Pollack L, et al. Thrombosis in a pregnant hemophilia A carrier after  
26 intrapartum recombinant factor VIII. *Obstet Gynecol* 2005;**105**(4):875-6.
- 27 7. Eckhardt CL, Mauser-Bunschoten EP, Peters M, et al. Inhibitor incidence after intensive  
28 FVIII replacement for surgery in mild and moderate haemophilia A: a prospective  
29 national study in the Netherlands. *Br J Haematol* 2012;**157**(6):747-52.
- 30 8. Astermark J. FVIII inhibitors: pathogenesis and avoidance. *Blood* 2015;**125**(13):2045-51.
- 31 9. d'Oiron R, Pipe SW, Jacquemin M. Mild/moderate haemophilia A: new insights into  
32 molecular mechanisms and inhibitor development. *Haemophilia* 2008;**14 Suppl**  
33 **3**:138-46.
- 34 10. Kaufmann JE, Vischer UM. Cellular mechanisms of the hemostatic effects of  
35 desmopressin (DDAVP). *J Thromb Haemost* 2003;**1**(4):682-9.
- 36 11. Mannucci. Desmopressin (DDAVP) in the treatment of bleeding disorders. *World*  
37 *federation of hemophilia* 2012.
- 38 12. Pan J, Dinh TT, Rajaraman A, et al. Patterns of expression of factor VIII and von  
39 Willebrand factor by endothelial cell subsets in vivo. *Blood* 2016.
- 40 13. Stoof SC, Sanders YV, Petrij F, et al. Response to desmopressin is strongly dependent  
41 on F8 gene mutation type in mild and moderate haemophilia A. *Thromb Haemost*  
42 2013;**109**(3):440-9.
- 43 14. Nance D, Fletcher SN, Bolgiano DC, et al. Factor VIII mutation and desmopressin-  
44 responsiveness in 62 patients with mild haemophilia A. *Haemophilia* 2013;**19**(5):720-  
45 6.
- 46 15. Castaman G, Mancuso ME, Giacomelli SH, et al. Molecular and phenotypic determinants  
47 of the response to desmopressin in adult patients with mild hemophilia A. *J Thromb*  
48 *Haemost* 2009;**7**(11):1824-31.
- 49 16. Stoof SC, Cnossen MH, de Maat MP, et al. Side effects of desmopressin in patients with  
50 bleeding disorders. *Haemophilia* 2016;**22**(1):39-45.
- 51 17. Mannucci PM, Bettega D, Cattaneo M. Patterns of development of tachyphylaxis in  
52 patients with haemophilia and von Willebrand disease after repeated doses of  
53 desmopressin (DDAVP). *Br J Haematol* 1992;**82**(1):87-93.
- 54 18. Björkman S. Limited blood sampling for pharmacokinetic dose tailoring of FVIII in the  
55 prophylactic treatment of haemophilia A. *Haemophilia* 2010;**16**(4):597-605.
- 56 19. Carlsson M, Berntorp E, Bjorkman S, et al. Improved cost-effectiveness by  
57 pharmacokinetic dosing of factor VIII in prophylactic treatment of haemophilia A.  
58 *Haemophilia* 1997;**3**(2):96-101.

- 1  
2  
3 20. Hazendonk H, Fijnvandraat K, Lock J, et al. A population pharmacokinetic model for  
4 perioperative dosing of factor VIII in hemophilia A patients. *Haematologica* 2016.  
5 21. Hazendonk HC, van Moort I, Fijnvandraat K, et al. The "OPTI-CLOT" trial. A randomised  
6 controlled trial on periOperative Pharmacokinetic-guided dosing of CLOTting factor  
7 concentrate in haemophilia A. *Thromb Haemost* 2015;**114**(3):639-44.  
8 22. Kaatz S, Ahmad D, Spyropoulos AC, et al. Definition of clinically relevant non-major  
9 bleeding in studies of anticoagulants in atrial fibrillation and venous thromboembolic  
10 disease in non-surgical patients: communication from the SSC of the ISTH. *J Thromb*  
11 *Haemost* 2015;**13**(11):2119-26.  
12 23. Schulman S, Kearon C, Subcommittee on Control of Anticoagulation of the S, et al.  
13 Definition of major bleeding in clinical investigations of antihemostatic medicinal  
14 products in non-surgical patients. *J Thromb Haemost* 2005;**3**(4):692-4.  
15 24. Kwaliteitsinstituut voor de Gezondheidszorg, C. B. O. *Diagnostiek, preventie en*  
16 *behandeling van veneuze trombo-embolie en secundaire preventie van arteriële*  
17 *trombose*. Alphen aan den Rijn: Van Zuiden Communications, 2008.  
18 25. Kwaliteitsinstituut voor de Gezondheidszorg CBO. *Diagnostiek, behandeling en zorg voor*  
19 *patienten met een beroerte : richtlijn*. Utrecht: Nederlandse Vereniging voor  
20 Neurologie; Utrecht: Kwaliteitsinstituut voor de Gezondheidszorg CBO, 2008.  
21 26. Leebeek FWG, Mauser-Bunschoten EP. *Diagnostiek en behandeling van hemofilie en*  
22 *aanverwante hemostasestoornissen : richtlijn*. Alphen aan den Rijn: Van Zuiden  
23 Communications, 2009.  
24  
25  
26  
27  
28  
29  
30  
31  
32  
33  
34  
35  
36  
37  
38  
39  
40  
41  
42  
43  
44  
45  
46  
47  
48  
49  
50  
51  
52  
53  
54  
55  
56  
57  
58  
59  
60



## Legends to tables and figures

### Table 1: Overview of blood sampling for FVIII:C measurements

Grey: obligatory measurements

† only in case of elective surgery, otherwise before first desmopressin administration  
 ‡ pre = before desmopressin, post = after desmopressin, peak = after FVIII-concentrate, post-treat = after surgery; in case of bleeding; 2-6 hours after desmopressin, trough = before next dose of FVIII-concentrate

‡ pre = before desmopressin, post = after desmopressin, peak = after loading dose FVIII-concentrate, post-treat = after surgery; in case of bleeding: 2-6 hours after desmopressin, pre-adjust = before dosage, steady state = FVIII-measurement at random time point  
 FVIII measurements are shown here until day 3 after start of combination treatment. Monitoring will continue if treatment is still necessary.

### Table 2: Target ranges for FVIII:C in IU/ml in the perioperative setting<sup>26</sup>

### Figure 1: Flowchart of study

**Figure 2: FVIII:C course after desmopressin and FVIII concentrate combination treatment in a pilot patient with moderate haemophilia A (FVIII:C 0.04 IU/ml). T<sub>0</sub> = preoperative desmopressin infusion. Lines are the predicted FVIII:C. Predictions were based on a previous desmopressin test dose and FVIII concentrate administration, prior to study inclusion. Solid line is total FVIII:C and can be measured. Open circles are measured FVIII:C. Infusions of desmopressin and FVIII concentrate (FVIII con.) are depicted with arrows.**

**Table 1: Overview of blood sampling for FVIII:C measurements**

|                             | Within 4 weeks before surgery† | D0 =<br>Day of first desmopressin infusion |      |      |            | D1  |      |            |     | D2   |            | D3           | 4-8 weeks after FVIII treatment |
|-----------------------------|--------------------------------|--------------------------------------------|------|------|------------|-----|------|------------|-----|------|------------|--------------|---------------------------------|
| Time – bolus infusions‡     | baseline                       | pre                                        | post | peak | post-treat | pre | post | peak       | pre | post | peak       | trough       |                                 |
| Time – continuous infusion‡ | baseline                       | pre                                        | post | peak | post-treat | pre | post | pre-adjust | pre | post | pre-adjust | steady state |                                 |
| Primary endpoint            |                                |                                            |      |      |            | X   |      |            | X   |      |            | X            |                                 |
| Sodium                      | X                              | X                                          |      |      |            | X   |      |            | X   |      |            | X            |                                 |
| Neutralizing antibodies     | X                              |                                            |      |      |            |     |      |            |     |      |            |              | X                               |

Grey: obligatory measurements

† only in case of elective surgery, otherwise before first desmopressin administration

‡ pre = before desmopressin, post = after desmopressin, peak = after FVIII-concentrate, post-treat = after surgery; in case of bleeding; 2-6 hours after desmopressin, trough = before next dose of FVIII-concentrate

‡ pre = before desmopressin, post = after desmopressin, peak = after loading dose FVIII-concentrate, post-treat = after surgery; in case of bleeding; 2-6 hours after desmopressin, pre-adjust = before dosage, steady state = FVIII-measurement at random time point

FVIII measurements are shown here until day 3 after start of combination treatment.

Monitoring will continue if treatment is still necessary.

**Table 2: Target ranges for FVIII:C in IU/ml in the perioperative setting<sup>26</sup>**

| Time                 | FVIII target level (IU/ml) |
|----------------------|----------------------------|
| Day 0 (hour 0-24)    | 0.8-1.0 (peak)             |
| Day 1-4 (hour 24-96) | 0.5-0.8 (trough)           |
| Day ≥ 5 (hour > 96)  | 0.3-0.5 (trough)           |

1  
2  
3  
4  
5  
6  
7  
8  
9  
10  
11  
12  
13  
14  
15  
16  
17  
18  
19  
20  
21  
22  
23  
24  
25  
26  
27  
28  
29  
30  
31  
32  
33  
34  
35  
36  
37  
38  
39  
40  
41  
42  
43  
44  
45  
46  
47  
48  
49  
50  
51  
52  
53  
54  
55  
56  
57  
58  
59  
60

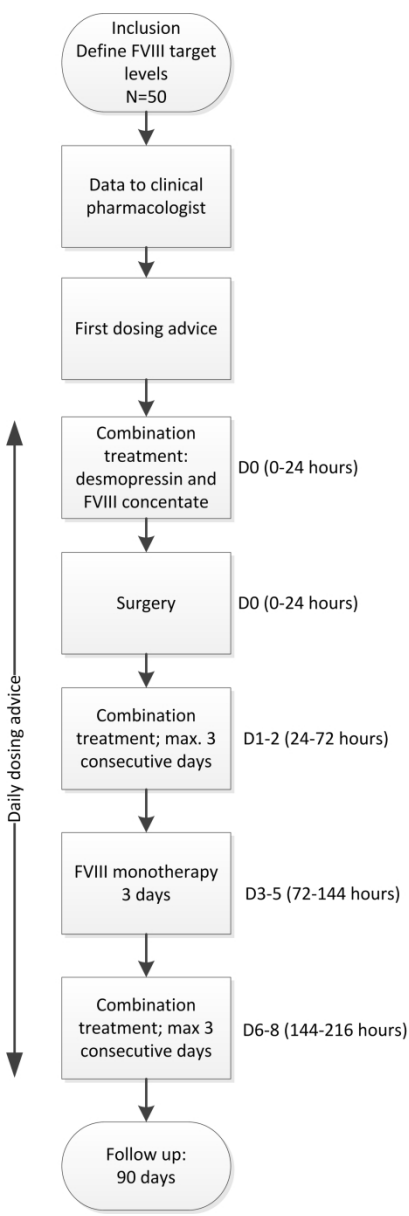

Figure 1: Flowchart of study  
177x519mm (300 x 300 DPI)

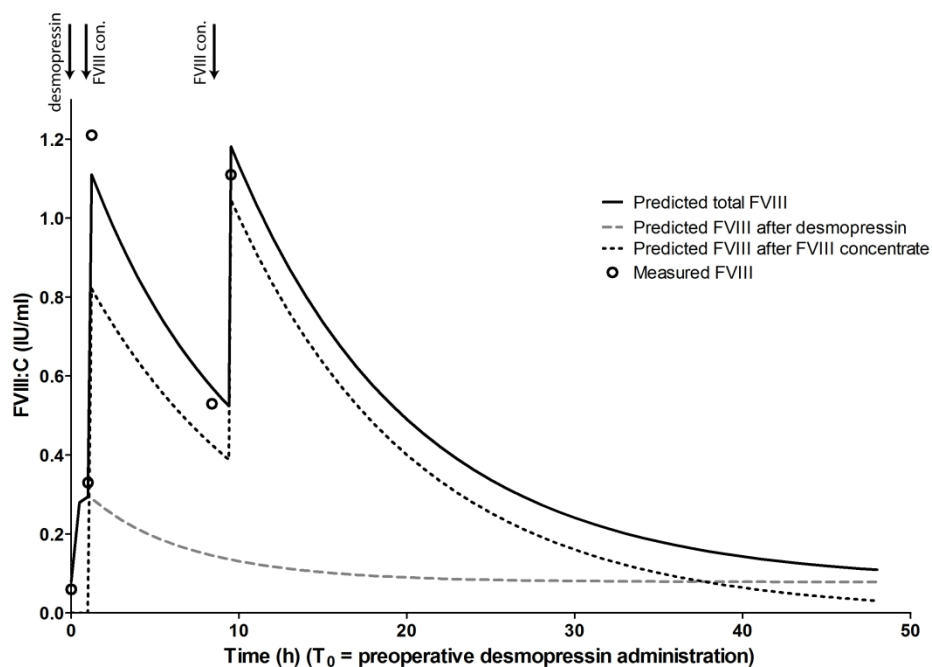

Figure 2: FVIII:C course after desmopressin and FVIII concentrate combination treatment in a pilot patient with moderate haemophilia A (FVIII:C 0.04 IU/ml). T<sub>0</sub> = preoperative desmopressin infusion. Lines are the predicted FVIII:C. Predictions were based on a previous desmopressin test dose and FVIII concentrate administration, prior to study inclusion. Solid line is total FVIII:C and can be measured. Open circles are measured FVIII:C. Infusions of desmopressin and FVIII concentrate (FVIII con.) are depicted with arrows.

246x171mm (300 x 300 DPI)

DAVID - study

Revised Standards for Quality Improvement Reporting Excellence (SQUIRE 2.0)  
September 15, 2015

| Text Section and Item Name    | Section or Item Description                                                                                                                                                                                                                                                                                                                                                                                                                                                                                                                                                                                                                                                                                                                                                                                                                                                                                                                                                                                           |
|-------------------------------|-----------------------------------------------------------------------------------------------------------------------------------------------------------------------------------------------------------------------------------------------------------------------------------------------------------------------------------------------------------------------------------------------------------------------------------------------------------------------------------------------------------------------------------------------------------------------------------------------------------------------------------------------------------------------------------------------------------------------------------------------------------------------------------------------------------------------------------------------------------------------------------------------------------------------------------------------------------------------------------------------------------------------|
| Notes to authors              | <ul style="list-style-type: none"> <li>• The SQUIRE guidelines provide a framework for reporting new knowledge about how to improve healthcare</li> <li>• The SQUIRE guidelines are intended for reports that describe <u>system</u> level work to improve the quality, safety, and value of healthcare, and used methods to establish that observed outcomes were due to the <u>intervention(s)</u>.</li> <li>• A range of approaches exists for improving healthcare. SQUIRE may be adapted for reporting any of these.</li> <li>• Authors should consider every SQUIRE item, but it may be inappropriate or unnecessary to include every SQUIRE element in a particular manuscript.</li> <li>• The SQUIRE Glossary contains definitions of many of the key words in SQUIRE.</li> <li>• The Explanation and Elaboration document provides specific examples of well-written SQUIRE items, and an in-depth explanation of each item.</li> <li>• Please cite SQUIRE when it is used to write a manuscript.</li> </ul> |
| <b>Title and Abstract</b>     |                                                                                                                                                                                                                                                                                                                                                                                                                                                                                                                                                                                                                                                                                                                                                                                                                                                                                                                                                                                                                       |
| 1. Title                      | Indicate that the manuscript concerns an <u>initiative</u> to improve healthcare (broadly defined to include the quality, safety, effectiveness, patient-centeredness, timeliness, cost, efficiency, and equity of healthcare) ✓                                                                                                                                                                                                                                                                                                                                                                                                                                                                                                                                                                                                                                                                                                                                                                                      |
| 2. Abstract                   | a. Provide adequate information to aid in searching and indexing ✓<br>b. Summarize all key information from various sections of the text using the abstract format of the intended publication or a structured summary such as: background, local <u>problem</u> , methods, interventions, results, conclusions ✓                                                                                                                                                                                                                                                                                                                                                                                                                                                                                                                                                                                                                                                                                                     |
| <b>Introduction</b>           | <i>Why did you start?</i>                                                                                                                                                                                                                                                                                                                                                                                                                                                                                                                                                                                                                                                                                                                                                                                                                                                                                                                                                                                             |
| 3. <u>Problem Description</u> | Nature and significance of the local <u>problem</u> ✓                                                                                                                                                                                                                                                                                                                                                                                                                                                                                                                                                                                                                                                                                                                                                                                                                                                                                                                                                                 |
| 4. Available knowledge        | Summary of what is currently known about the <u>problem</u> , including relevant previous studies ✓                                                                                                                                                                                                                                                                                                                                                                                                                                                                                                                                                                                                                                                                                                                                                                                                                                                                                                                   |



|                                        |                                                                                                                                                                                                                                                                                                                                                                                                                                                                                                                                                                                                                        |
|----------------------------------------|------------------------------------------------------------------------------------------------------------------------------------------------------------------------------------------------------------------------------------------------------------------------------------------------------------------------------------------------------------------------------------------------------------------------------------------------------------------------------------------------------------------------------------------------------------------------------------------------------------------------|
| 5. <u>Rationale</u>                    | Informal or formal frameworks, models, concepts, and/or <u>theories</u> used to explain the <u>problem</u> , any reasons or <u>assumptions</u> that were used to develop the <u>intervention(s)</u> , and reasons why the <u>intervention(s)</u> was expected to work ✓                                                                                                                                                                                                                                                                                                                                                |
| 6. <u>Specific aims</u>                | Purpose of the project and of this report ✓                                                                                                                                                                                                                                                                                                                                                                                                                                                                                                                                                                            |
| <u>Methods</u>                         | <i>What did you do?</i>                                                                                                                                                                                                                                                                                                                                                                                                                                                                                                                                                                                                |
| 7. <u>Context</u>                      | Contextual elements considered important at the outset of introducing the <u>intervention(s)</u> ✓                                                                                                                                                                                                                                                                                                                                                                                                                                                                                                                     |
| 8. <u>Intervention(s)</u>              | a. Description of the <u>intervention(s)</u> in sufficient detail that others could reproduce it ✓<br>b. Specifics of the team involved in the work ✓                                                                                                                                                                                                                                                                                                                                                                                                                                                                  |
| 9. <u>Study of the Intervention(s)</u> | a. Approach chosen for assessing the impact of the <u>intervention(s)</u> ✓<br>b. Approach used to establish whether the observed outcomes were due to the <u>intervention(s)</u> ✓                                                                                                                                                                                                                                                                                                                                                                                                                                    |
| 10. <u>Measures</u>                    | a. Measures chosen for studying <u>processes</u> and outcomes of the <u>intervention(s)</u> , including rationale for choosing them, their operational definitions, and their validity and reliability ✓<br>b. Description of the approach to the ongoing assessment of contextual elements that contributed to the success, failure, efficiency, and cost ✓<br>c. Methods employed for assessing completeness and accuracy of data ✓                                                                                                                                                                                  |
| 11. <u>Analysis</u>                    | a. Qualitative and quantitative methods used to draw <u>inferences</u> from the data ✓<br>b. Methods for understanding variation within the data, including the effects of time as a variable ✓                                                                                                                                                                                                                                                                                                                                                                                                                        |
| 12. <u>Ethical Considerations</u>      | <u>Ethical aspects</u> of implementing and studying the <u>intervention(s)</u> and how they were addressed, including, but not limited to, formal ethics review and potential conflict(s) of interest ✓                                                                                                                                                                                                                                                                                                                                                                                                                |
| <u>Results</u>                         | <i>What did you find?</i> NA                                                                                                                                                                                                                                                                                                                                                                                                                                                                                                                                                                                           |
| 13. <u>Results</u>                     | a. Initial steps of the <u>intervention(s)</u> and their evolution over time (e.g., time-line diagram, flow chart, or table), including modifications made to the intervention during the project NA<br>b. Details of the <u>process</u> measures and outcome ✓<br>c. Contextual elements that interacted with the <u>intervention(s)</u><br>d. Observed associations between outcomes, interventions, and relevant contextual elements NA<br>e. Unintended consequences such as unexpected benefits, problems, failures, or costs associated with the <u>intervention(s)</u> . NA<br>f. Details about missing data NA |
| <u>Discussion</u>                      | <i>What does it mean?</i>                                                                                                                                                                                                                                                                                                                                                                                                                                                                                                                                                                                              |
| 14. <u>Summary</u>                     | a. Key findings, including relevance to the <u>rationale</u> and specific aims NA<br>b. Particular strengths of the project ✓                                                                                                                                                                                                                                                                                                                                                                                                                                                                                          |

|                    |                                                                                                                                                                                                                                                                                                                                                                                                                                                                                                                                 |
|--------------------|---------------------------------------------------------------------------------------------------------------------------------------------------------------------------------------------------------------------------------------------------------------------------------------------------------------------------------------------------------------------------------------------------------------------------------------------------------------------------------------------------------------------------------|
| 15. Interpretation | <ul style="list-style-type: none"> <li>a. Nature of the association between the <u>intervention(s)</u> and the outcomes <i>na</i></li> <li>b. Comparison of results with findings from other publications <i>na</i></li> <li>c. Impact of the project on people and <u>systems</u> ✓</li> <li>d. Reasons for any differences between observed and anticipated outcomes, including the influence of <u>context</u> <i>na</i></li> <li>e. Costs and strategic trade-offs, including <u>opportunity costs</u> <i>na</i></li> </ul> |
| 16. Limitations    | <ul style="list-style-type: none"> <li>a. Limits to the <u>generalizability</u> of the work ✓</li> <li>b. Factors that might have limited <u>internal validity</u> such as confounding, bias, or imprecision in the design, methods, measurement, or analysis ✓</li> <li>c. Efforts made to minimize and adjust for limitations ✓</li> </ul>                                                                                                                                                                                    |
| 17. Conclusions    | <ul style="list-style-type: none"> <li>a. Usefulness of the work ✓</li> <li>b. Sustainability ✓</li> <li>c. Potential for spread to other <u>contexts</u> <i>na</i></li> <li>d. Implications for practice and for further study in the field <i>na</i></li> <li>e. Suggested next steps <i>na</i></li> </ul>                                                                                                                                                                                                                    |
| Other information  |                                                                                                                                                                                                                                                                                                                                                                                                                                                                                                                                 |
| 18. Funding        | Sources of funding that supported this work. Role, if any, of the funding organization in the design, implementation, interpretation, and reporting ✓                                                                                                                                                                                                                                                                                                                                                                           |

1  
2  
3  
4  
5  
6  
7  
8  
9  
10  
11  
12  
13  
14  
15  
16  
17  
18  
19  
20  
21  
22  
23  
24  
25  
26  
27  
28  
29  
30  
31  
32  
33  
34  
35  
36  
37  
38  
39  
40  
41  
42  
43  
44  
45  
46  
47  
48  
49  
50  
51  
52  
53  
54  
55  
56  
57  
58  
59  
60

For peer review only



# BMJ Open

## Desmopressin treatment combined with clotting factor VIII concentrates in patients with non-severe haemophilia A: protocol for a multicentre single-armed trial, the DAVID study

|                                 |                                                                                                                                                                                                                                                                                                                                                                                                                                                                                                                                                                                                                                                                                                                                                                                                                                                                                                                                                                                                                                                        |
|---------------------------------|--------------------------------------------------------------------------------------------------------------------------------------------------------------------------------------------------------------------------------------------------------------------------------------------------------------------------------------------------------------------------------------------------------------------------------------------------------------------------------------------------------------------------------------------------------------------------------------------------------------------------------------------------------------------------------------------------------------------------------------------------------------------------------------------------------------------------------------------------------------------------------------------------------------------------------------------------------------------------------------------------------------------------------------------------------|
| Journal:                        | <i>BMJ Open</i>                                                                                                                                                                                                                                                                                                                                                                                                                                                                                                                                                                                                                                                                                                                                                                                                                                                                                                                                                                                                                                        |
| Manuscript ID                   | bmjopen-2018-022719.R1                                                                                                                                                                                                                                                                                                                                                                                                                                                                                                                                                                                                                                                                                                                                                                                                                                                                                                                                                                                                                                 |
| Article Type:                   | Protocol                                                                                                                                                                                                                                                                                                                                                                                                                                                                                                                                                                                                                                                                                                                                                                                                                                                                                                                                                                                                                                               |
| Date Submitted by the Author:   | 16-Jul-2018                                                                                                                                                                                                                                                                                                                                                                                                                                                                                                                                                                                                                                                                                                                                                                                                                                                                                                                                                                                                                                            |
| Complete List of Authors:       | Schütte, Lisette; Erasmus MC, Haematology<br>Cnossen, Marjon; Erasmus MC Sophia, Pediatric Hematology<br>Van Hest, Reinier; AMC, Hospital Pharmacy<br>Driessens, Mariette; Netherlands Haemophilia Patient Society<br>Fijnvandraat, Karin; Emma Kinderziekenhuis AMC, Pediatric Hematology;<br>Sanquin Research, Plasma Proteins<br>Polinder, Suzanne; Erasmus MC, Public Health<br>Beckers, Erik; Maastricht University Medical Centre, Haematology<br>Coppens, Michiel; Academic Medical Center, Vascular Medicine<br>Eikenboom, Jeroen; Leids Universitair Medisch Centrum, Thrombosis and Haemostasis<br>Laros-van Gorkom, Britta; Radboudumc, Haematology<br>Meijer, Karina; Universitair Medisch Centrum Groningen, Department of Haematology<br>Nieuwenhuizen, Laurens; Maxima Medisch Centrum, Haematology<br>Mausser-Bunschoten, Evelien; University Medical Centre Utrecht, Van Creveldclinic<br>Leebeek, Frank; Erasmus MC, Hematology<br>Mathôt, Ron; Academic Medical Center, Hospital Pharmacy<br>Kruip, Marieke; Erasmus MC, Hematology |
| <b>Primary Subject Heading</b>: | Haematology (incl blood transfusion)                                                                                                                                                                                                                                                                                                                                                                                                                                                                                                                                                                                                                                                                                                                                                                                                                                                                                                                                                                                                                   |
| Secondary Subject Heading:      | Patient-centred medicine, Pharmacology and therapeutics, Surgery                                                                                                                                                                                                                                                                                                                                                                                                                                                                                                                                                                                                                                                                                                                                                                                                                                                                                                                                                                                       |
| Keywords:                       | Haemophilia A, Desmopressin, FVIII concentrate, SURGERY, Pharmacokinetic modelling                                                                                                                                                                                                                                                                                                                                                                                                                                                                                                                                                                                                                                                                                                                                                                                                                                                                                                                                                                     |
|                                 |                                                                                                                                                                                                                                                                                                                                                                                                                                                                                                                                                                                                                                                                                                                                                                                                                                                                                                                                                                                                                                                        |

SCHOLARONE™  
Manuscripts

1  
2  
3  
4  
5  
6  
7  
8  
9  
10  
11  
12  
13  
14  
15

## **Desmopressin treatment combined with clotting factor VIII concentrates in patients with non-severe haemophilia A: protocol for a multicentre single-armed trial, the DAVID study**

L.M. Schütte<sup>1</sup>, M.H. Clossen<sup>2</sup>, R.M. van Hest<sup>3</sup>, M.H.E. Driessens<sup>4</sup>, K. Fijnvandraat<sup>5</sup>, S. Polinder<sup>6</sup>, E.A.M. Beckers<sup>7</sup>, M. Coppens<sup>8</sup>, J. Eikenboom<sup>9</sup>, B.A.P. Laros-van Gorkom<sup>10</sup>, K. Meijer<sup>11</sup>, L. Nieuwenhuizen<sup>12</sup>, E.P. Mauser-Bunschoten<sup>13</sup>, F.W.G. Leebeek<sup>1</sup>, R.A.A. Mathôt<sup>3</sup>, M.J.H.A. Kruip<sup>1</sup>

16  
17  
18  
19  
20  
21  
22  
23  
24  
25  
26  
27  
28  
29  
30  
31

Corresponding Author:

Dr. Marieke J.H.A. Kruip

Room Na-823

P.O. Box 2040

3000 CA Rotterdam

The Netherlands

e-mail: [m.kruip@erasmusmc.nl](mailto:m.kruip@erasmusmc.nl)

telephone number: +31 10 7033123

### Affiliations

<sup>1</sup>Department of Haematology, Erasmus University Medical Centre, Rotterdam, the Netherlands;

<sup>2</sup>Department of Paediatric Haematology, Erasmus University Medical Centre - Sophia Children's Hospital, Rotterdam, the Netherlands; <sup>3</sup>Department of Hospital Pharmacy, Academic Medical Centre, Amsterdam, the Netherlands; <sup>4</sup>Netherlands Haemophilia Patient Society, Nijkerk, the Netherlands; <sup>5</sup>Department of Paediatric Haematology, Academic Medical Centre, Amsterdam, The Netherlands; Department of Plasma Proteins, Sanquin Research, Amsterdam, The Netherlands; <sup>6</sup>Department of Public Health, Erasmus University Medical Centre, Rotterdam, the Netherlands; <sup>7</sup>Department of Haematology, Maastricht University Medical Centre, Maastricht, the Netherlands; <sup>8</sup>Department of Vascular Medicine, Academic Medical Centre, Amsterdam, the Netherlands; <sup>9</sup>Department of Thrombosis and Haemostasis, Leiden University Medical Centre, Leiden, the Netherlands; <sup>10</sup>Department of Haematology, Radboud University Medical Centre, Nijmegen, the Netherlands; <sup>11</sup>Department of Haematology, University Medical Centre Groningen, Groningen, the Netherlands; <sup>12</sup>Department of Haematology, Maxima Medical Centre, Eindhoven, the Netherlands; <sup>13</sup>Van Creveldkliniek, Utrecht, the Netherlands

54  
55  
56  
57  
58  
59  
60

Word count: 3710

## Abstract

### Introduction:

Haemophilia A is an inherited bleeding disorder characterised by factor VIII (FVIII) deficiency. In non-severe haemophilia A patients, surgery and bleeding are the main indications for treatment with FVIII concentrate. A recent study reported that standard dosing frequently results in FVIII levels (FVIII:C) below or above FVIII target ranges, leading to respectively a bleeding risk or excessive costs. In addition, FVIII concentrate treatment carries a risk of development of neutralizing antibodies.

An alternative is desmopressin, which releases endogenous FVIII and von Willebrand factor. In most non-severe haemophilia A patients, desmopressin alone is not enough to achieve FVIII target levels during surgery or bleeding. We hypothesize that combined pharmacokinetic (PK) guided administration of desmopressin and FVIII concentrate may improve dosing accuracy and reduces FVIII concentrate consumption.

### Methods and analysis:

In the DAVID study, fifty non-severe haemophilia A patients (FVIII:C  $\geq$ 0.01 IU/ml) with a bleeding episode or undergoing surgery will receive desmopressin and FVIII concentrate combination treatment. The necessary dose of FVIII concentrate to reach FVIII target levels after desmopressin administration, will be calculated with a population PK model. The primary endpoint is the proportion of patients reaching FVIII target levels during the first 72 hours after start of the combination treatment. This approach was successfully tested in one pilot patient who received perioperative combination treatment.

### Ethics and dissemination:

The DAVID study was approved by the medical ethics committee of the Erasmus MC. Results of the study will be communicated through publication in international scientific journals and presentation at (inter)national conferences.

Trial registration: NTR5383 ([www.trialregister.nl](http://www.trialregister.nl)), EudraCT: 2014-00535-14

### Strengths and limitations of this study

- The DAVID-study is a multicentre, prospective trial including patients from all Haemophilia Treatment Centres in the Netherlands.
- Desmopressin and FVIII concentrate combination treatment is an innovative treatment option for non-severe haemophilia A patients.
- By using maximum *a posteriori* Bayesian estimation based on an integrated population pharmacokinetic model and measured FVIII levels, the dosing of FVIII concentrate may be improved, with less FVIII levels above and below target.
- The DAVID study is a single-armed trial.
- The study population is heterogeneous as all types of surgery and bleeding episodes may be included.

## Introduction

Haemophilia A is an X-linked bleeding disorder characterized by a factor VIII (FVIII) deficiency. Non-severe haemophilia A patients (FVIII:C  $\geq$  0.01-0.40 IU/ml) suffer from bleeding in the perioperative setting and after (minor) trauma. Treatment consists of either desmopressin or FVIII concentrate.

FVIII concentrate is an effective, but expensive treatment option. With current dosing based on body weight, baseline FVIII:C and target FVIII:C, FVIII:C both below (7-45%) and above FVIII (32-81%) target levels have been observed.<sup>1-3</sup> FVIII:C below target may lead to an increased bleeding risk, whereas levels above target increase the costs. Excessively high FVIII:C may also be associated with thrombosis.<sup>4-6</sup> In addition, high FVIII concentrate doses may induce the development of FVIII neutralizing antibodies, causing ineffectiveness of treatment with FVIII concentrate. In cases where antibodies cross-react with patient's endogenous FVIII they can even cause a severe phenotype with spontaneous bleeding.<sup>7-9</sup> Therefore, dosing within the target range with restriction of FVIII concentrate use is important.

An alternative to FVIII concentrate is desmopressin, a synthetic analogue of vasopressin. It releases von Willebrand factor (VWF) and FVIII from the endothelium and thereby improves haemostasis.<sup>10-12</sup> Although treatment is often effective, FVIII:C response to desmopressin exhibits a high variability between haemophilia A patients. Contributing factors reported in literature are age, baseline FVIII:C and the *F8*-gene mutation.<sup>13-15</sup> However, these factors do not explain the observed variability entirely. In addition, in most patients FVIII:C does not increase sufficiently to prevent perioperative bleeding.

Other limitations of desmopressin are the experienced side effects and tachyphylaxis. Most side effects are mild and transient, such as vasodilation. More severe side-effects like hyponatremia are rare and can usually be prevented by a fluid restriction.<sup>16</sup> Tachyphylaxis occurs when repeated dosages of desmopressin are given with short time intervals (12-24 hours). The decrease in FVIII:C response is approximately 30% from the second dose onwards and is believed to be caused by a temporary depletion of VWF and FVIII from the endothelium.<sup>17</sup>

Combined administration of desmopressin and FVIII concentrate may be able to overcome several of the drawbacks of both separate treatment options. However, there is a lack of experience and knowledge with regard to the efficacy and safety of combination treatment. Moreover, optimization of dosing is necessary to get and keep FVIII:C within the target range.

A valuable approach could be pharmacokinetic (PK) guided dosing, where FVIII:C responses of future dosages are predicted based on a population pharmacokinetic model in

1  
2  
3 combination with a limited number (2-3) of FVIII:C measurements, obtained after administration  
4 of desmopressin and/or FVIII concentrate. This technique was previously shown to be effective  
5 in both the prophylactic and perioperative setting in severe and moderate haemophilia A  
6 patients.<sup>18-21</sup>  
7

8  
9 Therefore, we hypothesize that combined PK guided dosing of desmopressin and FVIII  
10 concentrate may be a feasible treatment option in non-severe haemophilia A patients with a  
11 bleeding episode or undergoing surgery. Our aim is to show that the proportion of patients with  
12 FVIII:C within the FVIII target ranges can be increased by the use of the combination treatment  
13 and PK-guided dosing. In addition, the consumption of FVIII concentrate will be reduced. This  
14 innovative approach in haemophilia treatment may be a promising alternative with an increase  
15 in quality of care and a concomitant cost reduction.  
16  
17  
18  
19  
20  
21

## 22 **Methods and analysis**

### 23 Objectives

24  
25 The primary objective of the DAVID study is to evaluate if combination treatment of  
26 desmopressin and PK-guided dosing of FVIII concentrate is able to increase the proportion of  
27 non-severe haemophilia A patients with FVIII:C within the target range during the first 72 hours  
28 after start of combination treatment compared to historical controls.  
29  
30  
31  
32

### 33 *Secondary objectives:*

- 34 1. To assess FVIII concentrate consumption in all patients.
  - 35 2. To acquire data to improve the integrated population PK model for desmopressin  
36 and FVIII concentrate combination treatment
  - 37 3. To establish (possible) adverse events of combination treatment; e.g. side effects  
38 of desmopressin, bleeding episodes, development of neutralizing antibodies,  
39 and thrombotic events.
  - 40 4. To evaluate the extent of tachyphylaxis after desmopressin treatment.
  - 41 5. To perform an economical evaluation to quantify the potential cost reduction of  
42 the combination treatment.
  - 43 6. To evaluate the experienced quality of patient care.
- 44  
45  
46  
47  
48  
49  
50  
51

### 52 Design

53  
54 The DAVID study is a multicentre single-arm trial in non-severe haemophilia A patients with a  
55 bleeding episode or if they need a surgical procedure. Patients will receive combination  
56  
57  
58  
59  
60

1  
2  
3 treatment of desmopressin and FVIII concentrate instead of the conventional treatment which  
4 consists of FVIII concentrate monotherapy.  
5  
6  
7

### 8 Patient selection and recruitment

9 Non-severe haemophilia A patients  $\geq 12$  years of age with a bleeding episode or undergoing a  
10 surgical procedure, requiring FVIII replacement therapy and having a sufficient response to  
11 desmopressin, will be included. Patients will be recruited from one of the following haemophilia  
12 treatment centres in the Netherlands: Erasmus University Medical Centre Rotterdam, Academic  
13 Medical Centre Amsterdam, Leiden University Medical Centre, University Medical Centre  
14 Groningen, Radboud university medical centre Nijmegen, University Medical Centre Utrecht,  
15 Maxima Medical Centre Eindhoven and Maastricht University Medical Centre. They will be  
16 approached by telephone or during a visit to the (outpatient)\_clinic when they present with a  
17 bleeding or need a surgical procedure.  
18  
19  
20  
21  
22  
23  
24

#### 25 *Inclusion criteria:*

- 26 - Non-severe haemophilia A patients (FVIII:C  $\geq 0.01$  IU/ml)
- 27 - Requiring a surgical procedure or having a bleeding episode
- 28 - Requiring replacement therapy with FVIII concentrate for at least 48 hours
- 29 - Age between 12 and 70 years at study inclusion date
- 30 - (Parental) informed consent
- 31 - Results of a desmopressin test available (minimal absolute FVIII:C increase  $>0.2$  IU/ml)

#### 32 *Exclusion criteria:*

- 33 - Patients with other congenital or acquired haemostatic abnormalities
- 34 - Inadequate response to desmopressin (absolute increase in FVIII:C  $<0.2$  IU/ml) during a  
35 previous desmopressin test
- 36 - FVIII neutralizing antibodies (in medical history), unless successfully treated with  
37 immunotolerance induction therapy
- 38 - Initiation of FVIII concentrate treatment  $>24$  hours before study inclusion
- 39 - Patients not eligible for desmopressin treatment due to contraindications, e.g.: intolerance,  
40 interactions with co-medication or due to type of surgery

### Interventions and study procedures

All patients will receive combination treatment of desmopressin and FVIII concentrate during a bleeding episode or in the perioperative setting for at least 48 hours. All patients will receive a standard dose of desmopressin intravenously (0.3 µg/kg; no maximum dose). In order to combine both medication regimens, an individualized dosing advice for FVIII concentrate will be provided by the clinical pharmacologist. The initial dosing advice will be based on the FVIII:C response observed after a test administration of desmopressin (see below) and previously collected patient and population pharmacokinetic data after administration of desmopressin (endogenous FVIII) and FVIII concentrate (exogenous FVIII). The treating physician states the duration of combination treatment, the mode of administration of FVIII concentrate (continuous or intermittent administration) and determines FVIII target ranges. During combination treatment FVIII:C will be assessed regularly. Accordingly dose adjustments for FVIII concentrate will be made iteratively based on the results of a desmopressin test administration and using Bayesian analysis. Bayesian analysis will be performed with the NONMEM® software using a dedicated integrated population model describing the PK of FVIII following both the administration of desmopressin and FVIII concentrate. As bleeding or acute surgery calls for immediate treatment and constructing a dosing advice takes time, a patient may be included in the DAVID-study until 24 hours after the start of FVIII concentrate monotherapy.

Adherence to the study protocol will be improved by the use of a separate script per included patient, in which an approximated timeline, contact details and all responsibilities of the involved research and treatment team are written down.

### *Concomitant treatment*

As patients receive desmopressin, they will have a fluid restriction of 1.5 L per 24 hours, till 24 hours after the last desmopressin administration. Furthermore, all concomitant treatment and therapeutics are allowed, except for the therapeutics specified in the exclusion criteria. This includes other treatment than desmopressin or factor concentrate necessary to prevent or treat bleeding, such as tranexamic acid. The same will apply for prophylactic treatment to prevent thrombosis. These treatment options will be applied at the discretion of the treating physician and will be documented in all patients.

### *Desmopressin test administration*

All patients must have undergone a desmopressin test with at least three FVIII:C measurements. If performed during childhood (<18 years), the test is only admissible when



1  
2  
3 performed  $\leq 4$  years before study inclusion. When no desmopressin test has been performed  
4 meeting these criteria, the test should be performed with a standard intravenous desmopressin  
5 dose of 0.3  $\mu\text{g}/\text{kg}$  infused over 30 minutes with a minimum of three FVIII:C measurements:  
6  
7 before the administration of desmopressin, 1 hour after desmopressin administration for peak  
8 measurement and at least one sample thereafter, for example after 4 hours. All time points of  
9 blood sampling and end of desmopressin administration should be documented precisely, as  
10 well as exact desmopressin dose and duration of infusion.  
11  
12  
13  
14

### 15 16 *Pharmacokinetic (PK) guided dosing*

17 In order to provide an individualized dosing advice, a Bayesian analysis will be performed on the  
18 basis of an integrated population PK model. This population model has been constructed based  
19 on two population pharmacokinetic models: 1) a population PK model of FVIII:C response after  
20 desmopressin administration<sup>22</sup> and 2) a population PK model of FVIII:C after administration of  
21 FVIII concentrate.<sup>22</sup> This latter model was constructed based on perioperative data from 29 non-  
22 severe, adult haemophilia A patients from whom 245 FVIII:C measurements were available. The  
23 final model estimated the baseline FVIII:C to which estimated FVIII:C, that followed  
24 administration of FVIII concentrate, were added according to a one-compartment model with  
25 first-order elimination. Two covariates could be identified after multivariate regression analysis:  
26 VWF:Ag had a negative association with clearance and the most recently measured FVIII:C had  
27 a positive association with the estimated baseline. The within-patient variability (variability  
28 between different treatment episodes with FVIII concentrate) was 51.2% on baseline FVIII:C. In  
29 table 1 the most important model characteristics are shown.  
30  
31  
32  
33  
34  
35  
36  
37

38 The integrated population PK model, used in this study, describes the average PK, including  
39 the variability of the baseline FVIII:C and FVIII:C response between and within patients following  
40 both the administration of desmopressin and the administration of FVIII concentrate. This model  
41 will be used for both the perioperative setting and around bleeding episodes. The individualized  
42 dosing advice for the first dose of FVIII concentrate will be provided based on this model along  
43 with the results of the desmopressin test administration and the perioperative FVIII target levels.  
44 Further dosing of FVIII concentrates will be adjusted daily by iterative maximum *a posteriori*  
45 Bayesian analysis based on the population PK model in conjunction with perioperatively  
46 measured FVIII:C. In this analysis the following information will be included: 1) FVIII release in  
47 response to desmopressin after the test dose 2) baseline FVIII:C and 3) measured FVIII:C (both  
48 trough and peak levels)(figure 1 and table 2). Dose adjustments based on this iterative  
49  
50  
51  
52  
53  
54  
55  
56  
57  
58  
59  
60

1  
2  
3 Bayesian analysis will be performed in NONMEM® software. All dosing advices will be given  
4 one day in advance.  
5  
6  
7

### 8 *Experienced quality of patient care*

9 To assess experienced quality of care during this innovative intervention, two questionnaires will  
10 be given to the patients. Side effects will be assessed using the questionnaire previously  
11 developed and used by Stoof et al..<sup>16</sup> This questionnaire includes the occurrence of ten different  
12 self-reported side effects on a five-point scale. Side effects will be evaluated at two time points:  
13 before surgery and three days after surgery. In the second questionnaire (three days after  
14 surgery) experienced quality of care will be evaluated with the addition of three questions  
15 dedicated to desmopressin and FVIII concentrate combination treatment. Patients will report  
16 their satisfaction with the combination treatment on a scale of 1 to 100. They will have the  
17 opportunity to explain what is needed to improve the given grade. Finally, they can state their  
18 preference for one of the treatment options: FVIII concentrate monotherapy or combination  
19 treatment. The last question will be only asked to patients who have a previous experience with  
20 FVIII concentrate monotherapy.  
21  
22  
23  
24  
25  
26  
27  
28  
29

### 30 Sample size

31 In the DAVID study, the proportion of patients that reach FVIII target levels with combination  
32 treatment in the first 72 hours postoperatively (without adding off-protocol FVIII concentrates)  
33 will be assessed. Historical data on current FVIII treatment show a proportion of 0.3 of non-  
34 severe haemophilia A patients with FVIII:C within target ranges in this time period.<sup>3</sup> A doubling  
35 of this proportion, leading to a proportion of patients of 0.6, is believed to be clinically relevant.  
36 To study this with a power of 90% and a two-sided significance level of 0.05, a sample size of  
37 minimally 25 patients is needed. As different surgical procedures, both major and minor, may be  
38 performed on included patients and the baseline FVIII:C level may have a wide range  
39 (approximately 0.01-0.60 IU/mL), the included patient population may be heterogeneous. In  
40 addition, patients may drop-out during the perioperative treatment. This may for example be the  
41 case if patients are no longer eligible to receive desmopressin due to changed clinical status.  
42 However, no specific stopping criteria are in state. To overcome both the heterogeneity and  
43 possible drop-out, we aim to include 50 patients.  
44  
45  
46  
47  
48  
49  
50  
51

52 To reach our target sample size an ensure we do not miss any patients, all participating  
53 centers will be updated regularly by e-mail, newsletters and during meetings.  
54  
55  
56  
57  
58  
59  
60

## Outcome measures

### *Primary outcome:*

The proportion of patients with FVIII trough levels within the FVIII target range during the first 72 hours after start of combination treatment. If a patient has one trough level outside the target range or needs off-protocol FVIII concentrate within the first 72 hours of combination the treatment, the primary endpoint is not reached in that patient. Off-protocol FVIII concentrate is defined as all administered FVIII concentrate outside the PK-guided dosing advice as given by the clinical pharmacologist. FVIII:C will be targeted according to the Dutch Treatment Guideline (Table 3).<sup>23</sup> The treating physician may deviate from the guideline and set different target ranges, based on bleeding phenotype/history or type of surgery.

FVIII:C measurements will be performed with the one-stage assay. Each participating may use its own assay. However, all centers are certified and accredited.

### *Secondary outcomes:*

- FVIII concentrate consumption, expressed as the total amount of administered units of FVIII concentrate per kilogram per patient;
- Number and nature of adverse events during combined treatment;
- Incidence and severity of bleeding, where the severity of bleeding will be graded according to the ISTH criteria for major and minor bleeding,<sup>24 25</sup>
- Incidence of FVIII neutralizing antibodies; measured with the Bethesda assay
- Incidence of thrombosis, where thrombosis will be defined according to the Dutch guidelines on thrombosis, myocardial infarctions and strokes;<sup>26 27</sup>
- Incidence and extent of tachyphylaxis, defined as a reduction in the absolute increase in FVIII:C after the second and third desmopressin infusion;
- Medical costs and an economic evaluation;
- Experience quality of patient care, measured by a questionnaire

## Data analysis plan

All baseline characteristics will be described as means and standard deviations or medians with interquartile ranges, dependent on whether the parameter is normally distributed. The primary outcome, the proportion of patients within FVIII target ranges, will be analysed by a chi-square test. Retrospective data will be used as a reference, as the DAVID-study only has one study arm.<sup>3</sup> Pharmacokinetic data will be analysed using the NONMEM® software package.

Tachyphylaxis of FVIII:C response to desmopressin will be analysed with a paired t-test. Other

1  
2  
3 secondary outcomes will be documented in a descriptive manner, except for the economic  
4 analysis.  
5  
6

### 7 *Economic analysis*

8  
9 An economic evaluation will be performed from a health care perspective from the day of  
10 surgery to 90 days postoperatively. The cost-effectiveness of combined treatment will be  
11 assessed by calculating the incremental cost-effectiveness ratio (ICER), defined as the  
12 difference in costs of combined treatment, compared to usual care, divided by the average  
13 change in effectiveness. Actual medical costs will be calculated by multiplying the volumes of  
14 healthcare use with the corresponding unit prices. Perioperative data resource use  
15 (desmopressin, FVIII concentrates, additional FVIII:C and VWF measurements, PK-profiling) will  
16 be collected from medical files. Usual medical costs (to compare to combination treatment  
17 costs) will be calculated based on a treatment protocol as it would have been without  
18 desmopressin use, taking into account patient's body weight, baseline FVIII:C and type of  
19 surgery. The reduction in costs will be represented by the usual medical costs (units of FVIII  
20 concentrates) minus the actual medical costs for combined treatment (units of FVIII  
21 concentrates, µg of desmopressin, extra FVIII:C measurements). An additional sensitivity  
22 analysis will be performed to assess the stability of the results to changes in costs and  
23 effectiveness parameters. Primary effectiveness parameter is the proportion of patients  
24 reaching FVIII target levels with desmopressin and FVIII concentrate combination treatment.  
25 Secondary effectiveness parameter is the frequency of adverse events during combination  
26 treatment.  
27  
28  
29  
30  
31  
32  
33  
34  
35  
36  
37  
38

### 39 Patient and Public Involvement

40  
41 During the development of this study we worked closely together with the Netherlands  
42 Haemophilia Patient Society (NVHP). One representative of the NVHP is member of the project  
43 committee and helped us with the study design. Moreover, 5 members of the NVHP were  
44 invited to comment on the patient information. The design and information were adjusted  
45 according to their opinions and questions. The final results of the DAVID study will be  
46 communicated through scientific international journals and at international conferences. One  
47 major conference may be that of the World Federation of Haemophilia, attended by both  
48 physicians, researchers and patients from all over the world. In addition, the results will be  
49 communicated in the magazine of the NVHP. Finally, results will also be implemented in the  
50 treatment guidelines and patient information will be adjusted accordingly.  
51  
52  
53  
54  
55  
56  
57  
58  
59  
60

### Proof of concept

As a proof of concept, we present one case of a patient that was treated with desmopressin and FVIII concentrate combination treatment for the duration of 24 hours. The patient was a 53 year old male with moderate severe haemophilia A (FVIII:C 0.04 IU/ml). His body weight was 100 kg. He was in need of dental surgery and needed treatment to prevent bleeding. He received an infusion of desmopressin (0.3 µg/kg) over 30 minutes, followed 30 minutes later by FVIII concentrate in a dose of 25 IU/kg (2500 IU). He received a second dose of FVIII concentrate (20 IU/kg; i.e. 2000 IU) in the evening to maintain his FVIII:C above target values. Both FVIII concentrate dosages were determined using the integrated PK model and based on the patient's response to a previous desmopressin dose and a previous FVIII concentrate administration. Figure 2 shows the measured FVIII:C and the FVIII:C as predicted by the integrated PK model. The measured FVIII:C trough level and peak levels were within 10% of the predicted levels (Figure 2). The patient only had mild side effects of desmopressin, i.e. flushing and mild tachycardia (101 bpm). To prevent bleeding, he was also treated with tranexamic acid for multiple days. No bleeding was reported before and after the surgery. However, because of a possible infection of the wound he was treated with antibiotics.

If this patient would not have received combination treatment, he would have been treated with FVIII concentrate monotherapy both before and after the dental surgery. As his baseline FVIII:C was 0.04 IU/mL, his body weight 100 kg and the target FVIII peak level was 0.80-1.00 IU/mL, the FVIII loading dose would be  $(1.00-0.04)/0.02 \times 100 = 4750$  IU (rounded to entire vials). In the evening the patient would have received 2500 IU to maintain the FVIII:C between the target FVIII. Therefore, combination treatment hypothetically saved 2750 IU FVIII concentrate in this patient.

### **Ethics and dissemination**

The study was approved by the Medical Ethics Committee of the Erasmus University Medical Centre Rotterdam, the Netherlands. The study will be conducted according to GCP guidelines and the Declaration of Helsinki. Written informed consent will be obtained from all patients by a member of the research team. Results of the study will be communicated to the (inter)national medical and scientific community through publication in high-ranking peer reviewed international journals and at (inter)national medical scientific conferences. Results of the study will also be implemented in the Dutch Haemophilia Treatment Guidelines. Hopefully the international society of Haemophilia Treatment Centres will adapt the results in their guidelines as well.

### Data monitoring committee and serious adverse events

This study does not carry any large safety risks as both FVIII concentrates and desmopressin are registered therapeutics for haemophilia treatment. In addition, to guarantee safety for all patients in this study, FVIII:C levels will be closely monitored to prevent any additional bleeding risks. Therefore a data safety monitoring board is not needed.

Serious adverse events (SAE) will be communicated to the sponsor within 24 hours. The sponsor will register the SAE within 15 days on *ToetsingOnline*, the Dutch registration system for SAEs.

### **Registration**

The trial is registered in the Dutch Trial Registry, number NTR5383 ([www.trialregister.nl](http://www.trialregister.nl)) and in EudraCT: 2014-00535-14.

### **Discussion**

This prospective trial will allow us to evaluate the safety and efficacy of combination treatment of desmopressin and FVIII concentrate in reaching target FVIII:C during bleeding episodes and in the perioperative setting. Dosing of FVIII concentrate will be determined by an integrated population PK model developed specifically for non-severe haemophilia A patients to be treated with combination treatment. Fifty non-severe haemophilia A patients will be included from all haemophilia treatment centres in the Netherlands to reach our aim.

The DAVID study has some limitations. First, this study is not designed as a randomized controlled trial; it does not include a control group. Therefore, no direct comparison to standard treatment will be possible. However, we performed an extensive retrospective cohort study to determine the effectiveness of current clinical practice in which 37 patients undergoing 52 surgeries, were evaluated.<sup>3</sup> Moreover, the amount of FVIII concentrate that would have been administered to the patients included in the DAVID study as if desmopressin was not administered and as if no PK-guided dosing was applied, will be calculated.

The second limitation is the heterogeneity of the study population. All types of surgery, unless not compatible with desmopressin treatment, may be included in the study. To limit the effects of this heterogeneity, only patients with an expected treatment duration of at least 48 hours will be included. Moreover, the data that were used to develop the integrated population PK model also included data from various types of surgery.



## Conclusion

In the DAVID study, efficacy and safety of desmopressin and FVIII concentrate combination treatment in non-severe haemophilia A patients will be determined. Using this innovative approach treatment of non-severe haemophilia A patients both during bleeding episodes and in the perioperative setting may be improved.

## Authors' contribution

MK, MCn, FL and RM designed the study and critically revised the manuscript. LS, SP and RH wrote the manuscript and refined the study design. MD, KF, EB, MCo, JE, BL-G, KM, LN and EM critically revised the manuscript and refined the study design.

We would like to specially thank MD for her contribution on behalf of the NVHP and the five NVHP members who helped to improve the patient information. In addition we would like to thank the pilot patient for his cooperation and for letting us use his case as an example.

## Funding statement

This work was supported by ZonMw, (grant number 836031003), the Dutch organisation for Health Research and Development.

## Competing interest statement

L.M. Schütte; received reimbursement from CSL-Behring for attending a symposium, not related to this study.

M.H. Cnossen; received unrestricted research/educational funding for various projects as well as travel fees from the following institutions and companies: ZonMW, Innovatiefonds, Pfizer, Baxalta/Shire, Bayer Schering Pharma, Novo Nordisk, Novartis, Roche and CSL Behring, all not related to this study.

R.M. van Hest, E.A.M. Beckers, M. Coppens, M. Driessens, L. Nieuwenhuizen, S.Polinder: nothing to disclose relevant to the DAVID study.

K. Fijnvandraat: is a member of the European Hemophilia Treatment and Standardization Board sponsored by Baxter, has received unrestricted research grants from CSL Behring and Bayer, and has given lectures at educational symposiums organized by Pfizer, Bayer and Baxter.

J. Eikenboom: received research funding from CSL Behring and honorarium for educational activity from Roche, not related to this study.

B.A.P. Laros-van Gorkom: received unrestricted educational grants from Baxter and CSL Behring, and speaker fees from Sanquin.

1  
2  
3 K. Meijer: research support from Bayer, Sanquin and Pfizer; speaker fees from Bayer, Sanquin,  
4 Boehringer Ingelheim, BMS and Aspen; consulting fees from Uniqure, not related to this study  
5 F.W.G. Leebeek; received unrestricted research grants from CSL-Behring and Baxalta/Shire not  
6 related to this study. He is consultant for Shire, NovoNordisk and UniQure. Fees go to the  
7 university.  
8

9  
10 R.A.A. Mathôt: received personal fees from Merck Sharp & Dohme and Zeria and grants from  
11 Bayer, UCB Pharma and Hoffman La Roche with no involvement in this study.  
12

13 M.J.H.A.Kruij; received unrestricted research grants from Pfizer, Innovatiefonds and Ferring  
14 with no involvement in this study.  
15  
16  
17

## 18 19 20 21 22 23 24 25 26 27 28 29 30 31 32 33 34 35 36 37 38 39 40 41 42 43 44 45 46 47 48 49 50 51 52 53 54 55 56 57 58 59 60

### References

1. Hazendonk HC, Lock J, Mathot RA, et al. Under dosing and overdosing of factor VIII in the perioperative setting in haemophilia a: A need for optimization of dosing. *Haemophilia* 2015;**21**((Hazendonk H.C.; Lock J.; Bouzariouh H.; Cnossen M.H.) Department of Pediatric Hematology, Erasmus University Medical Centre, Sophia Childrens Hospital, Rotterdam, Netherlands):81-82.
2. Hazendonk HC, Lock J, Mathot RA, et al. Perioperative treatment of hemophilia A patients: blood group O patients are at risk of bleeding complications. *J Thromb Haemost* 2016;**14**(3):468-78.
3. Schütte LM, de Rooij N, Hazendonk HCAM, et al. Perioperative FVIII Concentrate Treatment in Mild Hemophilia a Patients Shows a High Rate of Overdosing - David/Opti-Clot Studies. *Blood* 2015;**126**(23):3510-10.
4. Ritchie B, Woodman RC, Poon MC. Deep venous thrombosis in hemophilia A. *Am J Med* 1992;**93**(6):699-700.
5. Escuriola Ettingshausen C, Martinez Sagner I, Kreuz W. Portal vein thrombosis in a patient with severe haemophilia A and F V G1691A mutation during continuous infusion of F VIII after intramural jejunal bleeding - Successful thrombolysis under heparin therapy. *European Journal of Pediatrics, Supplement* 1999;**158**(3):S180-S82.
6. Russell Z, Riconda D, Pollack L, et al. Thrombosis in a pregnant hemophilia A carrier after intrapartum recombinant factor VIII. *Obstet Gynecol* 2005;**105**(4):875-6.
7. Eckhardt CL, Mauser-Bunschoten EP, Peters M, et al. Inhibitor incidence after intensive FVIII replacement for surgery in mild and moderate haemophilia A: a prospective national study in the Netherlands. *Br J Haematol* 2012;**157**(6):747-52.
8. Astermark J. FVIII inhibitors: pathogenesis and avoidance. *Blood* 2015;**125**(13):2045-51.
9. d'Oiron R, Pipe SW, Jacquemin M. Mild/moderate haemophilia A: new insights into molecular mechanisms and inhibitor development. *Haemophilia* 2008;**14 Suppl 3**:138-46.
10. Kaufmann JE, Vischer UM. Cellular mechanisms of the hemostatic effects of desmopressin (DDAVP). *J Thromb Haemost* 2003;**1**(4):682-9.
11. Mannucci. Desmopressin (DDAVP) in the treatment of bleeding disorders. *World federation of hemophilia* 2012.
12. Pan J, Dinh TT, Rajaraman A, et al. Patterns of expression of factor VIII and von Willebrand factor by endothelial cell subsets in vivo. *Blood* 2016.
13. Stoof SC, Sanders YV, Petrij F, et al. Response to desmopressin is strongly dependent on F8 gene mutation type in mild and moderate haemophilia A. *Thromb Haemost* 2013;**109**(3):440-9.
14. Nance D, Fletcher SN, Bolgiano DC, et al. Factor VIII mutation and desmopressin-responsiveness in 62 patients with mild haemophilia A. *Haemophilia* 2013;**19**(5):720-6.



15. Castaman G, Mancuso ME, Giacomelli SH, et al. Molecular and phenotypic determinants of the response to desmopressin in adult patients with mild hemophilia A. *J Thromb Haemost* 2009;**7**(11):1824-31.
16. Stoof SC, Cnossen MH, de Maat MP, et al. Side effects of desmopressin in patients with bleeding disorders. *Haemophilia* 2016;**22**(1):39-45.
17. Mannucci PM, Bettega D, Cattaneo M. Patterns of development of tachyphylaxis in patients with haemophilia and von Willebrand disease after repeated doses of desmopressin (DDAVP). *Br J Haematol* 1992;**82**(1):87-93.
18. Björkman S. Limited blood sampling for pharmacokinetic dose tailoring of FVIII in the prophylactic treatment of haemophilia A. *Haemophilia* 2010;**16**(4):597-605.
19. Carlsson M, Berntorp E, Bjorkman S, et al. Improved cost-effectiveness by pharmacokinetic dosing of factor VIII in prophylactic treatment of haemophilia A. *Haemophilia* 1997;**3**(2):96-101.
20. Hazendonk H, Fijnvandraat K, Lock J, et al. A population pharmacokinetic model for perioperative dosing of factor VIII in hemophilia A patients. *Haematologica* 2016.
21. Hazendonk HC, van Moort I, Fijnvandraat K, et al. The "OPTI-CLOT" trial. A randomised controlled trial on periOperative Pharmacokinetic-guided dosing of CLOTting factor concentrate in haemophilia A. *Thromb Haemost* 2015;**114**(3):639-44.
22. Schutte LM, van Hest RM, Stoof SCM, et al. Pharmacokinetic Modelling to Predict FVIII:C Response to Desmopressin and Its Reproducibility in Nonsevere Haemophilia A Patients. *Thromb Haemost* 2018.
23. Leebeek FWG, Mauser-Bunschoten EP. *Diagnostiek en behandeling van hemofilie en aanverwante hemostasestoornissen : richtlijn*. Alphen aan den Rijn: Van Zuiden Communications, 2009.
24. Kaatz S, Ahmad D, Spyropoulos AC, et al. Definition of clinically relevant non-major bleeding in studies of anticoagulants in atrial fibrillation and venous thromboembolic disease in non-surgical patients: communication from the SSC of the ISTH. *J Thromb Haemost* 2015;**13**(11):2119-26.
25. Schulman S, Kearon C, Subcommittee on Control of Anticoagulation of the S, et al. Definition of major bleeding in clinical investigations of antihemostatic medicinal products in non-surgical patients. *J Thromb Haemost* 2005;**3**(4):692-4.
26. Kwaliteitsinstituut voor de Gezondheidszorg, C. B. O. *Diagnostiek, preventie en behandeling van veneuze trombo-embolie en secundaire preventie van arteriële trombose*. Alphen aan den Rijn: Van Zuiden Communications, 2008.
27. Kwaliteitsinstituut voor de Gezondheidszorg CBO. *Diagnostiek, behandeling en zorg voor patiënten met een beroerte : richtlijn*. Utrecht: Nederlandse Vereniging voor Neurologie; Utrecht: Kwaliteitsinstituut voor de Gezondheidszorg CBO, 2008.

## Legends to tables and figures

### Table 1: Model characteristics of the population PK model for FVIII concentrates

The covariate associations between VWF:Ag on clearance was modeled as a nonlinear function, while the association between most recent FVIII:C and baseline FVIII:C was modeled as a linear function. The numbers for the covariate associations (-0.285 and 0.891) describe both the shape and magnitude of the covariate effect: the more the number deviates from 0 the larger the effect of a covariate on the PK parameter. RSE = relative standard error; VWF:Ag = von Willebrand factor antigen; IIV = Inter-individual variability

### Table 2: Overview of blood sampling for FVIII:C measurements

Grey: obligatory measurements

† only in case of elective surgery, otherwise before first desmopressin administration

‡ pre = before desmopressin, post = after desmopressin, peak = after FVIII-concentrate, post-treat = after surgery; in case of bleeding; 2-6 hours after desmopressin, trough = before next dose of FVIII-concentrate

± pre = before desmopressin, post = after desmopressin, peak = after loading dose FVIII-concentrate, post-treat = after surgery; in case of bleeding: 2-6 hours after desmopressin, pre-adjust = before dosage, steady state = FVIII-measurement at random time point

FVIII measurements are shown here until day 3 after start of combination treatment. Monitoring will continue if treatment is still necessary.

### Table 3: Target ranges for FVIII:C in IU/ml in the perioperative setting<sup>23</sup>

### Figure 1: Flowchart of study

### Figure 2: FVIII:C course after desmopressin and FVIII concentrate combination treatment

in a pilot patient with moderate haemophilia A (FVIII:C 0.04 IU/ml). T<sub>0</sub> = preoperative desmopressin infusion. Lines are the predicted FVIII:C. Predictions were based on a previous desmopressin test dose and FVIII concentrate administration, prior to study inclusion. Solid line is total FVIII:C and can be measured. Open circles are measured FVIII:C. Infusions of desmopressin and FVIII concentrate (FVIII con.) are depicted with arrows.

**Table 1: Model characteristics of the population PK model for FVIII concentrates**

| Parameter                               | Population estimate | RSE (%) |
|-----------------------------------------|---------------------|---------|
| Baseline FVIII:C (IU/mL)                | 0.211               | 10.9    |
| Clearance (mL/h)                        | 208                 | 10      |
| Volume of distribution (mL)             | 3400                | 4.9     |
| Proportional error (%)                  | 17.3                | 8.4     |
| VWF:Ag on clearance                     | -0.285              | 15.8    |
| Most recent FVIII:C on baseline FVIII:C | 0.891               | 5.4     |
| IIV of baseline FVIII:C (%)             | 54.7                | 11.0    |
| IIV of clearance (%)                    | 37.4                | 19.7    |
| IIV of volume of distribution (%)       | 20.8                | 26.8    |

The covariate associations between VWF:Ag on clearance was modeled as a nonlinear function, while the association between most recent FVIII:C and baseline FVIII:C was modeled as a linear function. The numbers for the covariate associations (-0.285 and 0.891) describe both the shape and magnitude of the covariate effect: the more the number deviates from 0 the larger the effect of a covariate on the PK parameter. RSE = relative standard error; VWF:Ag = von Willebrand factor antigen; IIV = Inter-individual variability

**Table 2: Overview of blood sampling for FVIII:C measurements**

|                             | Within 4 weeks before surgery† | D0 = Day of first desmopressin infusion |      |      |            |     | D1   |            |     | D2   |            | D3           | 4-8 weeks after FVIII treatment |
|-----------------------------|--------------------------------|-----------------------------------------|------|------|------------|-----|------|------------|-----|------|------------|--------------|---------------------------------|
| Time – bolus infusions‡     | baseline                       | pre                                     | post | peak | post-treat | pre | post | peak       | pre | post | peak       | trough       |                                 |
| Time – continuous infusion‡ | baseline                       | pre                                     | post | peak | post-treat | pre | post | pre-adjust | pre | post | pre-adjust | steady state |                                 |
| Primary endpoint            |                                |                                         |      |      |            | X   |      |            | X   |      |            | X            |                                 |
| Sodium                      | X                              | X                                       |      |      |            | X   |      |            | X   |      |            | X            |                                 |
| Neutralizing antibodies     | X                              |                                         |      |      |            |     |      |            |     |      |            |              | X                               |

Grey: obligatory measurements

† only in case of elective surgery, otherwise before first desmopressin administration

‡ pre = before desmopressin, post = after desmopressin, peak = after FVIII-concentrate, post-treat = after surgery; in case of bleeding; 2-6 hours after desmopressin, trough = before next dose of FVIII-concentrate

‡ pre = before desmopressin, post = after desmopressin, peak = after loading dose FVIII-concentrate, post-treat = after surgery; in case of bleeding: 2-6 hours after desmopressin, pre-adjust = before dosage, steady state = FVIII-measurement at random time point

FVIII measurements are shown here until day 3 after start of combination treatment. Monitoring will continue if treatment is still necessary.

**Table 3: Target ranges for FVIII:C in IU/ml in the perioperative setting<sup>23</sup>**

| Time                 | FVIII target level (IU/ml) |
|----------------------|----------------------------|
| Day 0 (hour 0-24)    | 0.8-1.0 (peak)             |
| Day 1-4 (hour 24-96) | 0.5-0.8 (trough)           |
| Day ≥ 5 (hour > 96)  | 0.3-0.5 (trough)           |

1  
2  
3  
4  
5  
6  
7  
8  
9  
10  
11  
12  
13  
14  
15  
16  
17  
18  
19  
20  
21  
22  
23  
24  
25  
26  
27  
28  
29  
30  
31  
32  
33  
34  
35  
36  
37  
38  
39  
40  
41  
42  
43  
44  
45  
46  
47  
48  
49  
50  
51  
52  
53  
54  
55  
56  
57  
58  
59  
60

For peer review only

1  
2  
3  
4  
5  
6  
7  
8  
9  
10  
11  
12  
13  
14  
15  
16  
17  
18  
19  
20  
21  
22  
23  
24  
25  
26  
27  
28  
29  
30  
31  
32  
33  
34  
35  
36  
37  
38  
39  
40  
41  
42  
43  
44  
45  
46  
47  
48  
49  
50  
51  
52  
53  
54  
55  
56  
57  
58  
59  
60

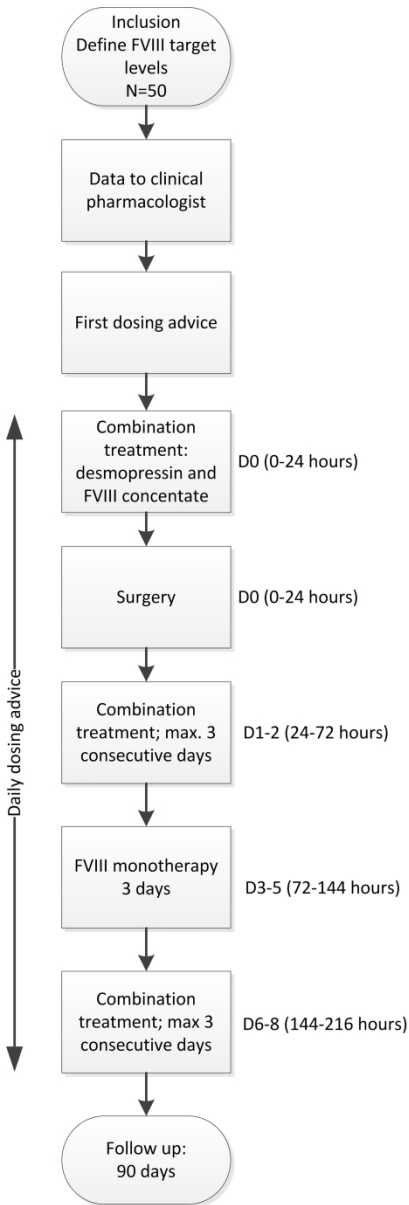

Figure 1: Flowchart of study  
263x773mm (300 x 300 DPI)

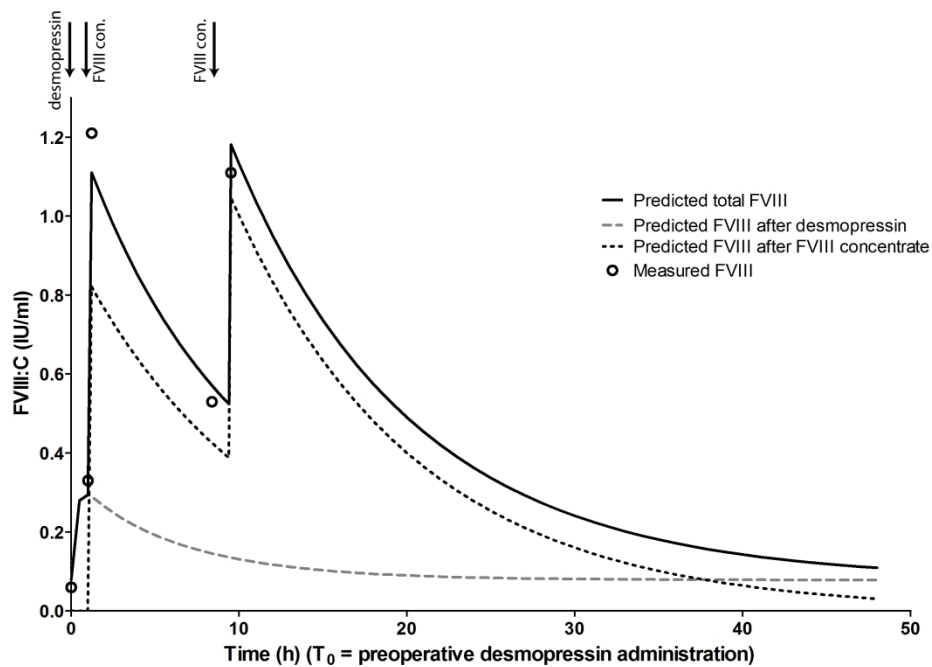

Figure 2: FVIII:C course after desmopressin and FVIII concentrate combination treatment in a pilot patient with moderate haemophilia A (FVIII:C 0.04 IU/ml). T<sub>0</sub> = preoperative desmopressin infusion. Lines are the predicted FVIII:C. Predictions were based on a previous desmopressin test dose and FVIII concentrate administration, prior to study inclusion. Solid line is total FVIII:C and can be measured. Open circles are measured FVIII:C. Infusions of desmopressin and FVIII concentrate (FVIII con.) are depicted with arrows.

246x171mm (300 x 300 DPI)



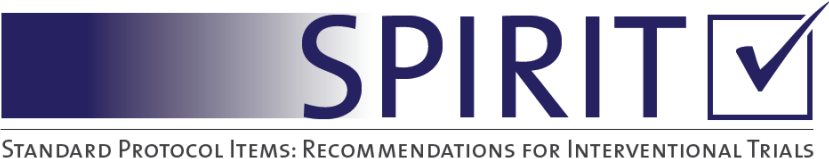

SPIRIT 2013 Checklist: Recommended items to address in a clinical trial protocol and related documents\*

| Section/item                      | Item No | Description                                                                                                                                                                                                                                                                              | Addressed on page number                        |
|-----------------------------------|---------|------------------------------------------------------------------------------------------------------------------------------------------------------------------------------------------------------------------------------------------------------------------------------------------|-------------------------------------------------|
| <b>Administrative information</b> |         |                                                                                                                                                                                                                                                                                          |                                                 |
| Title                             | 1       | Descriptive title identifying the study design, population, interventions, and, if applicable, trial acronym                                                                                                                                                                             | 1_____                                          |
| Trial registration                | 2a      | Trial identifier and registry name. If not yet registered, name of intended registry                                                                                                                                                                                                     | 2_ & 13_____                                    |
|                                   | 2b      | All items from the World Health Organization Trial Registration Data Set                                                                                                                                                                                                                 | Only in full protocol; available on request_    |
| Protocol version                  | 3       | Date and version identifier                                                                                                                                                                                                                                                              | NA_____                                         |
| Funding                           | 4       | Sources and types of financial, material, and other support                                                                                                                                                                                                                              | 14_____                                         |
| Roles and responsibilities        | 5a      | Names, affiliations, and roles of protocol contributors                                                                                                                                                                                                                                  | _1 & 14                                         |
|                                   | 5b      | Name and contact information for the trial sponsor                                                                                                                                                                                                                                       | 1                                               |
|                                   | 5c      | Role of study sponsor and funders, if any, in study design; collection, management, analysis, and interpretation of data; writing of the report; and the decision to submit the report for publication, including whether they will have ultimate authority over any of these activities | 14                                              |
|                                   | 5d      | Composition, roles, and responsibilities of the coordinating centre, steering committee, endpoint adjudication committee, data management team, and other individuals or groups overseeing the trial, if applicable (see Item 21a for data monitoring committee)                         | Only in full protocol; available on request____ |

**Introduction**

|    |                                                           |     |                                                                                                                                                                                                                                                                                                                                                                                |         |  |
|----|-----------------------------------------------------------|-----|--------------------------------------------------------------------------------------------------------------------------------------------------------------------------------------------------------------------------------------------------------------------------------------------------------------------------------------------------------------------------------|---------|--|
| 1  | Background and rationale                                  | 6a  | Description of research question and justification for undertaking the trial, including summary of relevant studies (published and unpublished) examining benefits and harms for each intervention                                                                                                                                                                             | 4 & 5   |  |
| 2  |                                                           |     |                                                                                                                                                                                                                                                                                                                                                                                |         |  |
| 3  |                                                           |     |                                                                                                                                                                                                                                                                                                                                                                                |         |  |
| 4  |                                                           | 6b  | Explanation for choice of comparators                                                                                                                                                                                                                                                                                                                                          | NA      |  |
| 5  |                                                           |     |                                                                                                                                                                                                                                                                                                                                                                                |         |  |
| 6  | Objectives                                                | 7   | Specific objectives or hypotheses                                                                                                                                                                                                                                                                                                                                              | 5       |  |
| 7  |                                                           |     |                                                                                                                                                                                                                                                                                                                                                                                |         |  |
| 8  | Trial design                                              | 8   | Description of trial design including type of trial (eg, parallel group, crossover, factorial, single group), allocation ratio, and framework (eg, superiority, equivalence, noninferiority, exploratory)                                                                                                                                                                      | 6       |  |
| 9  |                                                           |     |                                                                                                                                                                                                                                                                                                                                                                                |         |  |
| 10 |                                                           |     |                                                                                                                                                                                                                                                                                                                                                                                |         |  |
| 11 |                                                           |     |                                                                                                                                                                                                                                                                                                                                                                                |         |  |
| 12 | <b>Methods: Participants, interventions, and outcomes</b> |     |                                                                                                                                                                                                                                                                                                                                                                                |         |  |
| 13 |                                                           |     |                                                                                                                                                                                                                                                                                                                                                                                |         |  |
| 14 | Study setting                                             | 9   | Description of study settings (eg, community clinic, academic hospital) and list of countries where data will be collected. Reference to where list of study sites can be obtained                                                                                                                                                                                             | 6       |  |
| 15 |                                                           |     |                                                                                                                                                                                                                                                                                                                                                                                |         |  |
| 16 |                                                           |     |                                                                                                                                                                                                                                                                                                                                                                                |         |  |
| 17 | Eligibility criteria                                      | 10  | Inclusion and exclusion criteria for participants. If applicable, eligibility criteria for study centres and individuals who will perform the interventions (eg, surgeons, psychotherapists)                                                                                                                                                                                   | 6       |  |
| 18 |                                                           |     |                                                                                                                                                                                                                                                                                                                                                                                |         |  |
| 19 |                                                           |     |                                                                                                                                                                                                                                                                                                                                                                                |         |  |
| 20 | Interventions                                             | 11a | Interventions for each group with sufficient detail to allow replication, including how and when they will be administered                                                                                                                                                                                                                                                     | 7       |  |
| 21 |                                                           |     |                                                                                                                                                                                                                                                                                                                                                                                |         |  |
| 22 |                                                           |     |                                                                                                                                                                                                                                                                                                                                                                                |         |  |
| 23 |                                                           |     |                                                                                                                                                                                                                                                                                                                                                                                |         |  |
| 24 |                                                           | 11b | Criteria for discontinuing or modifying allocated interventions for a given trial participant (eg, drug dose change in response to harms, participant request, or improving/worsening disease)                                                                                                                                                                                 | NA      |  |
| 25 |                                                           |     |                                                                                                                                                                                                                                                                                                                                                                                |         |  |
| 26 |                                                           |     |                                                                                                                                                                                                                                                                                                                                                                                |         |  |
| 27 |                                                           | 11c | Strategies to improve adherence to intervention protocols, and any procedures for monitoring adherence (eg, drug tablet return, laboratory tests)                                                                                                                                                                                                                              | 7       |  |
| 28 |                                                           |     |                                                                                                                                                                                                                                                                                                                                                                                |         |  |
| 29 |                                                           |     |                                                                                                                                                                                                                                                                                                                                                                                |         |  |
| 30 |                                                           | 11d | Relevant concomitant care and interventions that are permitted or prohibited during the trial                                                                                                                                                                                                                                                                                  | 7       |  |
| 31 |                                                           |     |                                                                                                                                                                                                                                                                                                                                                                                |         |  |
| 32 | Outcomes                                                  | 12  | Primary, secondary, and other outcomes, including the specific measurement variable (eg, systolic blood pressure), analysis metric (eg, change from baseline, final value, time to event), method of aggregation (eg, median, proportion), and time point for each outcome. Explanation of the clinical relevance of chosen efficacy and harm outcomes is strongly recommended | 10      |  |
| 33 |                                                           |     |                                                                                                                                                                                                                                                                                                                                                                                |         |  |
| 34 |                                                           |     |                                                                                                                                                                                                                                                                                                                                                                                |         |  |
| 35 |                                                           |     |                                                                                                                                                                                                                                                                                                                                                                                |         |  |
| 36 |                                                           |     |                                                                                                                                                                                                                                                                                                                                                                                |         |  |
| 37 | Participant timeline                                      | 13  | Time schedule of enrolment, interventions (including any run-ins and washouts), assessments, and visits for participants. A schematic diagram is highly recommended (see Figure)                                                                                                                                                                                               | Table 2 |  |
| 38 |                                                           |     |                                                                                                                                                                                                                                                                                                                                                                                |         |  |
| 39 |                                                           |     |                                                                                                                                                                                                                                                                                                                                                                                |         |  |
| 40 |                                                           |     |                                                                                                                                                                                                                                                                                                                                                                                |         |  |
| 41 |                                                           |     |                                                                                                                                                                                                                                                                                                                                                                                |         |  |
| 42 |                                                           |     |                                                                                                                                                                                                                                                                                                                                                                                |         |  |
| 43 |                                                           |     |                                                                                                                                                                                                                                                                                                                                                                                |         |  |
| 44 |                                                           |     |                                                                                                                                                                                                                                                                                                                                                                                |         |  |
| 45 |                                                           |     |                                                                                                                                                                                                                                                                                                                                                                                |         |  |
| 46 |                                                           |     |                                                                                                                                                                                                                                                                                                                                                                                |         |  |

|    |                                                                     |     |                                                                                                                                                                                                                                                                                                                                                                                                              |       |
|----|---------------------------------------------------------------------|-----|--------------------------------------------------------------------------------------------------------------------------------------------------------------------------------------------------------------------------------------------------------------------------------------------------------------------------------------------------------------------------------------------------------------|-------|
| 1  | Sample size                                                         | 14  | Estimated number of participants needed to achieve study objectives and how it was determined, including clinical and statistical assumptions supporting any sample size calculations                                                                                                                                                                                                                        | 9     |
| 2  |                                                                     |     |                                                                                                                                                                                                                                                                                                                                                                                                              |       |
| 3  |                                                                     |     |                                                                                                                                                                                                                                                                                                                                                                                                              |       |
| 4  | Recruitment                                                         | 15  | Strategies for achieving adequate participant enrolment to reach target sample size                                                                                                                                                                                                                                                                                                                          | 9     |
| 5  |                                                                     |     |                                                                                                                                                                                                                                                                                                                                                                                                              |       |
| 6  |                                                                     |     |                                                                                                                                                                                                                                                                                                                                                                                                              |       |
| 7  | <b>Methods: Assignment of interventions (for controlled trials)</b> |     |                                                                                                                                                                                                                                                                                                                                                                                                              |       |
| 8  | Allocation:                                                         |     |                                                                                                                                                                                                                                                                                                                                                                                                              |       |
| 9  |                                                                     |     |                                                                                                                                                                                                                                                                                                                                                                                                              |       |
| 10 | Sequence                                                            | 16a | Method of generating the allocation sequence (eg, computer-generated random numbers), and list of any factors for stratification. To reduce predictability of a random sequence, details of any planned restriction (eg, blocking) should be provided in a separate document that is unavailable to those who enrol participants or assign interventions                                                     | NA    |
| 11 | generation                                                          |     |                                                                                                                                                                                                                                                                                                                                                                                                              |       |
| 12 |                                                                     |     |                                                                                                                                                                                                                                                                                                                                                                                                              |       |
| 13 |                                                                     |     |                                                                                                                                                                                                                                                                                                                                                                                                              |       |
| 14 |                                                                     |     |                                                                                                                                                                                                                                                                                                                                                                                                              |       |
| 15 |                                                                     |     |                                                                                                                                                                                                                                                                                                                                                                                                              |       |
| 16 | Allocation                                                          | 16b | Mechanism of implementing the allocation sequence (eg, central telephone; sequentially numbered, opaque, sealed envelopes), describing any steps to conceal the sequence until interventions are assigned                                                                                                                                                                                                    | NA    |
| 17 | concealment                                                         |     |                                                                                                                                                                                                                                                                                                                                                                                                              |       |
| 18 | mechanism                                                           |     |                                                                                                                                                                                                                                                                                                                                                                                                              |       |
| 19 |                                                                     |     |                                                                                                                                                                                                                                                                                                                                                                                                              |       |
| 20 | Implementation                                                      | 16c | Who will generate the allocation sequence, who will enrol participants, and who will assign participants to interventions                                                                                                                                                                                                                                                                                    | NA    |
| 21 |                                                                     |     |                                                                                                                                                                                                                                                                                                                                                                                                              |       |
| 22 |                                                                     |     |                                                                                                                                                                                                                                                                                                                                                                                                              |       |
| 23 |                                                                     |     |                                                                                                                                                                                                                                                                                                                                                                                                              |       |
| 24 | Blinding (masking)                                                  | 17a | Who will be blinded after assignment to interventions (eg, trial participants, care providers, outcome assessors, data analysts), and how                                                                                                                                                                                                                                                                    | NA    |
| 25 |                                                                     |     |                                                                                                                                                                                                                                                                                                                                                                                                              |       |
| 26 |                                                                     |     |                                                                                                                                                                                                                                                                                                                                                                                                              |       |
| 27 |                                                                     | 17b | If blinded, circumstances under which unblinding is permissible, and procedure for revealing a participant's allocated intervention during the trial                                                                                                                                                                                                                                                         | NA    |
| 28 |                                                                     |     |                                                                                                                                                                                                                                                                                                                                                                                                              |       |
| 29 |                                                                     |     |                                                                                                                                                                                                                                                                                                                                                                                                              |       |
| 30 |                                                                     |     |                                                                                                                                                                                                                                                                                                                                                                                                              |       |
| 31 | <b>Methods: Data collection, management, and analysis</b>           |     |                                                                                                                                                                                                                                                                                                                                                                                                              |       |
| 32 |                                                                     |     |                                                                                                                                                                                                                                                                                                                                                                                                              |       |
| 33 | Data collection                                                     | 18a | Plans for assessment and collection of outcome, baseline, and other trial data, including any related processes to promote data quality (eg, duplicate measurements, training of assessors) and a description of study instruments (eg, questionnaires, laboratory tests) along with their reliability and validity, if known. Reference to where data collection forms can be found, if not in the protocol | 8-10  |
| 34 | methods                                                             |     |                                                                                                                                                                                                                                                                                                                                                                                                              |       |
| 35 |                                                                     |     |                                                                                                                                                                                                                                                                                                                                                                                                              |       |
| 36 |                                                                     |     |                                                                                                                                                                                                                                                                                                                                                                                                              |       |
| 37 |                                                                     |     |                                                                                                                                                                                                                                                                                                                                                                                                              |       |
| 38 |                                                                     | 18b | Plans to promote participant retention and complete follow-up, including list of any outcome data to be collected for participants who discontinue or deviate from intervention protocols                                                                                                                                                                                                                    | 10-11 |
| 39 |                                                                     |     |                                                                                                                                                                                                                                                                                                                                                                                                              |       |
| 40 |                                                                     |     |                                                                                                                                                                                                                                                                                                                                                                                                              |       |
| 41 |                                                                     |     |                                                                                                                                                                                                                                                                                                                                                                                                              |       |
| 42 |                                                                     |     |                                                                                                                                                                                                                                                                                                                                                                                                              |       |
| 43 |                                                                     |     |                                                                                                                                                                                                                                                                                                                                                                                                              |       |
| 44 |                                                                     |     |                                                                                                                                                                                                                                                                                                                                                                                                              |       |
| 45 |                                                                     |     |                                                                                                                                                                                                                                                                                                                                                                                                              |       |
| 46 |                                                                     |     |                                                                                                                                                                                                                                                                                                                                                                                                              |       |

|    |                                 |     |                                                                                                                                                                                                                                                                                                                                       |                                             |
|----|---------------------------------|-----|---------------------------------------------------------------------------------------------------------------------------------------------------------------------------------------------------------------------------------------------------------------------------------------------------------------------------------------|---------------------------------------------|
| 1  | Data management                 | 19  | Plans for data entry, coding, security, and storage, including any related processes to promote data quality (eg, double data entry; range checks for data values). Reference to where details of data management procedures can be found, if not in the protocol                                                                     | Only in full protocol; available on request |
| 2  |                                 |     |                                                                                                                                                                                                                                                                                                                                       |                                             |
| 3  |                                 |     |                                                                                                                                                                                                                                                                                                                                       |                                             |
| 4  |                                 |     |                                                                                                                                                                                                                                                                                                                                       |                                             |
| 5  | Statistical methods             | 20a | Statistical methods for analysing primary and secondary outcomes. Reference to where other details of the statistical analysis plan can be found, if not in the protocol                                                                                                                                                              | 10                                          |
| 6  |                                 |     |                                                                                                                                                                                                                                                                                                                                       |                                             |
| 7  |                                 |     |                                                                                                                                                                                                                                                                                                                                       |                                             |
| 8  |                                 | 20b | Methods for any additional analyses (eg, subgroup and adjusted analyses)                                                                                                                                                                                                                                                              | 10+11                                       |
| 9  |                                 |     |                                                                                                                                                                                                                                                                                                                                       |                                             |
| 10 |                                 | 20c | Definition of analysis population relating to protocol non-adherence (eg, as randomised analysis), and any statistical methods to handle missing data (eg, multiple imputation)                                                                                                                                                       | NA                                          |
| 11 |                                 |     |                                                                                                                                                                                                                                                                                                                                       |                                             |
| 12 |                                 |     |                                                                                                                                                                                                                                                                                                                                       |                                             |
| 13 |                                 |     |                                                                                                                                                                                                                                                                                                                                       |                                             |
| 14 | <b>Methods: Monitoring</b>      |     |                                                                                                                                                                                                                                                                                                                                       |                                             |
| 15 |                                 |     |                                                                                                                                                                                                                                                                                                                                       |                                             |
| 16 | Data monitoring                 | 21a | Composition of data monitoring committee (DMC); summary of its role and reporting structure; statement of whether it is independent from the sponsor and competing interests; and reference to where further details about its charter can be found, if not in the protocol. Alternatively, an explanation of why a DMC is not needed | 13                                          |
| 17 |                                 |     |                                                                                                                                                                                                                                                                                                                                       |                                             |
| 18 |                                 |     |                                                                                                                                                                                                                                                                                                                                       |                                             |
| 19 |                                 |     |                                                                                                                                                                                                                                                                                                                                       |                                             |
| 20 |                                 |     |                                                                                                                                                                                                                                                                                                                                       |                                             |
| 21 |                                 |     |                                                                                                                                                                                                                                                                                                                                       |                                             |
| 22 |                                 | 21b | Description of any interim analyses and stopping guidelines, including who will have access to these interim results and make the final decision to terminate the trial                                                                                                                                                               | NA                                          |
| 23 |                                 |     |                                                                                                                                                                                                                                                                                                                                       |                                             |
| 24 |                                 |     |                                                                                                                                                                                                                                                                                                                                       |                                             |
| 25 | Harms                           | 22  | Plans for collecting, assessing, reporting, and managing solicited and spontaneously reported adverse events and other unintended effects of trial interventions or trial conduct                                                                                                                                                     | 13 + in full protocol; available on request |
| 26 |                                 |     |                                                                                                                                                                                                                                                                                                                                       |                                             |
| 27 |                                 |     |                                                                                                                                                                                                                                                                                                                                       |                                             |
| 28 |                                 |     |                                                                                                                                                                                                                                                                                                                                       |                                             |
| 29 | Auditing                        | 23  | Frequency and procedures for auditing trial conduct, if any, and whether the process will be independent from investigators and the sponsor                                                                                                                                                                                           | NA                                          |
| 30 |                                 |     |                                                                                                                                                                                                                                                                                                                                       |                                             |
| 31 |                                 |     |                                                                                                                                                                                                                                                                                                                                       |                                             |
| 32 |                                 |     |                                                                                                                                                                                                                                                                                                                                       |                                             |
| 33 | <b>Ethics and dissemination</b> |     |                                                                                                                                                                                                                                                                                                                                       |                                             |
| 34 |                                 |     |                                                                                                                                                                                                                                                                                                                                       |                                             |
| 35 | Research ethics approval        | 24  | Plans for seeking research ethics committee/institutional review board (REC/IRB) approval                                                                                                                                                                                                                                             | 12                                          |
| 36 |                                 |     |                                                                                                                                                                                                                                                                                                                                       |                                             |
| 37 |                                 |     |                                                                                                                                                                                                                                                                                                                                       |                                             |
| 38 | Protocol amendments             | 25  | Plans for communicating important protocol modifications (eg, changes to eligibility criteria, outcomes, analyses) to relevant parties (eg, investigators, REC/IRBs, trial participants, trial registries, journals, regulators)                                                                                                      | Only in full protocol; available on request |
| 39 |                                 |     |                                                                                                                                                                                                                                                                                                                                       |                                             |
| 40 |                                 |     |                                                                                                                                                                                                                                                                                                                                       |                                             |
| 41 |                                 |     |                                                                                                                                                                                                                                                                                                                                       |                                             |
| 42 |                                 |     |                                                                                                                                                                                                                                                                                                                                       |                                             |
| 43 |                                 |     |                                                                                                                                                                                                                                                                                                                                       |                                             |
| 44 |                                 |     |                                                                                                                                                                                                                                                                                                                                       |                                             |
| 45 |                                 |     |                                                                                                                                                                                                                                                                                                                                       |                                             |
| 46 |                                 |     |                                                                                                                                                                                                                                                                                                                                       |                                             |

|    |                               |     |                                                                                                                                                                                                                                                                                     |                                             |
|----|-------------------------------|-----|-------------------------------------------------------------------------------------------------------------------------------------------------------------------------------------------------------------------------------------------------------------------------------------|---------------------------------------------|
| 1  | Consent or assent             | 26a | Who will obtain informed consent or assent from potential trial participants or authorised surrogates, and how (see Item 32)                                                                                                                                                        | 12                                          |
| 2  |                               |     |                                                                                                                                                                                                                                                                                     |                                             |
| 3  |                               |     |                                                                                                                                                                                                                                                                                     |                                             |
| 4  |                               | 26b | Additional consent provisions for collection and use of participant data and biological specimens in ancillary studies, if applicable                                                                                                                                               | Only in full protocol; available on request |
| 5  |                               |     |                                                                                                                                                                                                                                                                                     |                                             |
| 6  |                               |     |                                                                                                                                                                                                                                                                                     |                                             |
| 7  |                               |     |                                                                                                                                                                                                                                                                                     |                                             |
| 8  | Confidentiality               | 27  | How personal information about potential and enrolled participants will be collected, shared, and maintained in order to protect confidentiality before, during, and after the trial                                                                                                | Only in full protocol; available on request |
| 9  |                               |     |                                                                                                                                                                                                                                                                                     |                                             |
| 10 |                               |     |                                                                                                                                                                                                                                                                                     |                                             |
| 11 |                               |     |                                                                                                                                                                                                                                                                                     |                                             |
| 12 |                               |     |                                                                                                                                                                                                                                                                                     |                                             |
| 13 | Declaration of interests      | 28  | Financial and other competing interests for principal investigators for the overall trial and each study site                                                                                                                                                                       | 14+15                                       |
| 14 |                               |     |                                                                                                                                                                                                                                                                                     |                                             |
| 15 |                               |     |                                                                                                                                                                                                                                                                                     |                                             |
| 16 | Access to data                | 29  | Statement of who will have access to the final trial dataset, and disclosure of contractual agreements that limit such access for investigators                                                                                                                                     | Only in full protocol; available on request |
| 17 |                               |     |                                                                                                                                                                                                                                                                                     |                                             |
| 18 |                               |     |                                                                                                                                                                                                                                                                                     |                                             |
| 19 |                               |     |                                                                                                                                                                                                                                                                                     |                                             |
| 20 | Ancillary and post-trial care | 30  | Provisions, if any, for ancillary and post-trial care, and for compensation to those who suffer harm from trial participation                                                                                                                                                       | Only in full protocol; available on request |
| 21 |                               |     |                                                                                                                                                                                                                                                                                     |                                             |
| 22 |                               |     |                                                                                                                                                                                                                                                                                     |                                             |
| 23 |                               |     |                                                                                                                                                                                                                                                                                     |                                             |
| 24 |                               |     |                                                                                                                                                                                                                                                                                     |                                             |
| 25 | Dissemination policy          | 31a | Plans for investigators and sponsor to communicate trial results to participants, healthcare professionals, the public, and other relevant groups (eg, via publication, reporting in results databases, or other data sharing arrangements), including any publication restrictions | 12                                          |
| 26 |                               |     |                                                                                                                                                                                                                                                                                     |                                             |
| 27 |                               |     |                                                                                                                                                                                                                                                                                     |                                             |
| 28 |                               |     |                                                                                                                                                                                                                                                                                     |                                             |
| 29 |                               | 31b | Authorship eligibility guidelines and any intended use of professional writers                                                                                                                                                                                                      | NA                                          |
| 30 |                               |     |                                                                                                                                                                                                                                                                                     |                                             |
| 31 |                               | 31c | Plans, if any, for granting public access to the full protocol, participant-level dataset, and statistical code                                                                                                                                                                     | NA                                          |
| 32 |                               |     |                                                                                                                                                                                                                                                                                     |                                             |
| 33 |                               |     |                                                                                                                                                                                                                                                                                     |                                             |
| 34 | <b>Appendices</b>             |     |                                                                                                                                                                                                                                                                                     |                                             |
| 35 |                               |     |                                                                                                                                                                                                                                                                                     |                                             |
| 36 | Informed consent materials    | 32  | Model consent form and other related documentation given to participants and authorised surrogates                                                                                                                                                                                  | Only in full protocol; available on request |
| 37 |                               |     |                                                                                                                                                                                                                                                                                     |                                             |
| 38 |                               |     |                                                                                                                                                                                                                                                                                     |                                             |
| 39 |                               |     |                                                                                                                                                                                                                                                                                     |                                             |
| 40 |                               |     |                                                                                                                                                                                                                                                                                     |                                             |
| 41 |                               |     |                                                                                                                                                                                                                                                                                     |                                             |
| 42 |                               |     |                                                                                                                                                                                                                                                                                     |                                             |
| 43 |                               |     |                                                                                                                                                                                                                                                                                     |                                             |
| 44 |                               |     |                                                                                                                                                                                                                                                                                     |                                             |
| 45 |                               |     |                                                                                                                                                                                                                                                                                     |                                             |
| 46 |                               |     |                                                                                                                                                                                                                                                                                     |                                             |

|   |            |    |                                                                                                           |                     |
|---|------------|----|-----------------------------------------------------------------------------------------------------------|---------------------|
| 1 | Biological | 33 | Plans for collection, laboratory evaluation, and storage of biological specimens for genetic or molecular | Only in full        |
| 2 | specimens  |    | analysis in the current trial and for future use in ancillary studies, if applicable                      | protocol; available |
| 3 |            |    |                                                                                                           | on request          |
| 4 |            |    |                                                                                                           |                     |

---

5 \*It is strongly recommended that this checklist be read in conjunction with the SPIRIT 2013 Explanation & Elaboration for important clarification on the items.  
6 Amendments to the protocol should be tracked and dated. The SPIRIT checklist is copyrighted by the SPIRIT Group under the Creative Commons  
7 [“Attribution-NonCommercial-NoDerivs 3.0 Unported”](#) license.  
8  
9  
10  
11  
12  
13  
14  
15  
16  
17  
18  
19  
20  
21  
22  
23  
24  
25  
26  
27  
28  
29  
30  
31  
32  
33  
34  
35  
36  
37  
38  
39  
40  
41  
42  
43  
44  
45  
46

For peer review only

# BMJ Open

## Desmopressin treatment combined with clotting factor VIII concentrates in patients with non-severe haemophilia A: protocol for a multicentre single-armed trial, the DAVID study

|                                 |                                                                                                                                                                                                                                                                                                                                                                                                                                                                                                                                                                                                                                                                                                                                                                                                                                                                                                                                                                                                                                                                                                                                               |
|---------------------------------|-----------------------------------------------------------------------------------------------------------------------------------------------------------------------------------------------------------------------------------------------------------------------------------------------------------------------------------------------------------------------------------------------------------------------------------------------------------------------------------------------------------------------------------------------------------------------------------------------------------------------------------------------------------------------------------------------------------------------------------------------------------------------------------------------------------------------------------------------------------------------------------------------------------------------------------------------------------------------------------------------------------------------------------------------------------------------------------------------------------------------------------------------|
| Journal:                        | <i>BMJ Open</i>                                                                                                                                                                                                                                                                                                                                                                                                                                                                                                                                                                                                                                                                                                                                                                                                                                                                                                                                                                                                                                                                                                                               |
| Manuscript ID                   | bmjopen-2018-022719.R2                                                                                                                                                                                                                                                                                                                                                                                                                                                                                                                                                                                                                                                                                                                                                                                                                                                                                                                                                                                                                                                                                                                        |
| Article Type:                   | Protocol                                                                                                                                                                                                                                                                                                                                                                                                                                                                                                                                                                                                                                                                                                                                                                                                                                                                                                                                                                                                                                                                                                                                      |
| Date Submitted by the Author:   | 08-Oct-2018                                                                                                                                                                                                                                                                                                                                                                                                                                                                                                                                                                                                                                                                                                                                                                                                                                                                                                                                                                                                                                                                                                                                   |
| Complete List of Authors:       | Schütte, Lisette; Erasmus MC, Haematology<br>Cnossen, Marjon; Erasmus MC Sophia, Pediatric Hematology<br>Van Hest, Reinier; Amsterdam UMC, Department of Hospital Pharmacy – Clinical Pharmacology Unit<br>Driessens, Mariette; Netherlands Haemophilia Patient Society<br>Fijnvandraat, Karin; Amsterdam UMC, Emma Children's hospital, Pediatric Haematology; Sanquin Research, Plasma Proteins<br>Polinder, Suzanne; Erasmus MC, Public Health<br>Beckers, Erik; Maastricht University Medical Centre, Haematology<br>Coppens, Michiel; Amsterdam UMC, Vascular Medicine<br>Eikenboom, Jeroen; Leids Universitair Medisch Centrum, Thrombosis and Haemostasis<br>Laros-van Gorkom, Britta; Radboudumc, Haematology<br>Meijer, Karina; Universitair Medisch Centrum Groningen, Department of Haematology<br>Nieuwenhuizen, Laurens; Maxima Medisch Centrum, Haematology<br>Mauser-Bunschoten, Evelien; University Medical Centre Utrecht, Van Creveldclinic<br>Leebeek, Frank; Erasmus MC, Hematology<br>Mathôt, Ron; Amsterdam UMC, Department of Hospital Pharmacy – Clinical Pharmacology Unit<br>Kruip, Marieke; Erasmus MC, Hematology |
| <b>Primary Subject Heading</b>: | Haematology (incl blood transfusion)                                                                                                                                                                                                                                                                                                                                                                                                                                                                                                                                                                                                                                                                                                                                                                                                                                                                                                                                                                                                                                                                                                          |
| Secondary Subject Heading:      | Patient-centred medicine, Pharmacology and therapeutics, Surgery                                                                                                                                                                                                                                                                                                                                                                                                                                                                                                                                                                                                                                                                                                                                                                                                                                                                                                                                                                                                                                                                              |
| Keywords:                       | Haemophilia A, Desmopressin, FVIII concentrate, SURGERY, Pharmacokinetic modelling                                                                                                                                                                                                                                                                                                                                                                                                                                                                                                                                                                                                                                                                                                                                                                                                                                                                                                                                                                                                                                                            |
|                                 |                                                                                                                                                                                                                                                                                                                                                                                                                                                                                                                                                                                                                                                                                                                                                                                                                                                                                                                                                                                                                                                                                                                                               |

SCHOLARONE™  
Manuscripts



1  
2  
3  
4  
5  
6  
7  
8  
9  
10  
11  
12  
13  
14  
15  
16  
17  
18  
19  
20  
21  
22  
23  
24  
25  
26  
27  
28  
29  
30  
31  
32  
33  
34  
35  
36  
37  
38  
39  
40  
41  
42  
43  
44  
45  
46  
47  
48  
49  
50  
51  
52  
53  
54  
55  
56  
57  
58  
59  
60

1  
2  
3  
4  
5  
6  
7  
8  
9  
10  
11  
12  
13  
14  
15

## **Desmopressin treatment combined with clotting factor VIII concentrates in patients with non-severe haemophilia A: protocol for a multicentre single-armed trial, the DAVID study**

L.M. Schütte<sup>1</sup>, M.H. Clossen<sup>2</sup>, R.M. van Hest<sup>3</sup>, M.H.E. Driessens<sup>4</sup>, K. Fijnvandraat<sup>5</sup>, S. Polinder<sup>6</sup>, E.A.M. Beckers<sup>7</sup>, M. Coppens<sup>8</sup>, J. Eikenboom<sup>9</sup>, B.A.P. Laros-van Gorkom<sup>10</sup>, K. Meijer<sup>11</sup>, L. Nieuwenhuizen<sup>12</sup>, E.P. Mauser-Bunschoten<sup>13</sup>, F.W.G. Leebeek<sup>1</sup>, R.A.A. Mathôt<sup>3</sup>, M.J.H.A. Kruip<sup>1</sup>

16  
17  
18  
19  
20  
21  
22  
23  
24  
25  
26  
27  
28  
29  
30  
31

Corresponding Author:

Dr. Marieke J.H.A. Kruip

Room Na-823

P.O. Box 2040

3000 CA Rotterdam

The Netherlands

e-mail: [m.kruip@erasmusmc.nl](mailto:m.kruip@erasmusmc.nl)

telephone number: +31 10 7033123

### Affiliations

<sup>1</sup>Department of Haematology, Erasmus University Medical Centre, Rotterdam, the Netherlands;

<sup>2</sup>Department of Paediatric Haematology, Erasmus University Medical Centre - Sophia Children's

Hospital, Rotterdam, the Netherlands; <sup>3</sup>Department of Hospital Pharmacy – Clinical

Pharmacology Unit, Amsterdam UMC, University of Amsterdam, the Netherlands; <sup>4</sup>Netherlands

Haemophilia Patient Society, Nijkerk, the Netherlands; <sup>5</sup>Department of Paediatric Haematology,

Amsterdam UMC, University of Amsterdam, The Netherlands; Department of Plasma Proteins,

Sanquin Research, Amsterdam, The Netherlands; <sup>6</sup>Department of Public Health, Erasmus

University Medical Centre, Rotterdam, the Netherlands; <sup>7</sup>Department of Haematology,

Maastricht University Medical Centre, Maastricht, the Netherlands; <sup>8</sup>Department of Vascular

Medicine, Amsterdam UMC, University of Amsterdam, the Netherlands; <sup>9</sup>Department of

Thrombosis and Haemostasis, Leiden University Medical Centre, Leiden, the Netherlands;

<sup>10</sup>Department of Haematology, Radboud University Medical Centre, Nijmegen, the Netherlands;

<sup>11</sup>Department of Haematology, University Medical Centre Groningen, Groningen, the

Netherlands; <sup>12</sup>Department of Haematology, Maxima Medical Centre, Eindhoven, the

Netherlands; <sup>13</sup>Van Creveldkliniek, Utrecht, the Netherlands

1  
2  
3 Word count: 3793  
4

## 5 **Abstract**

### 6 Introduction:

7  
8 Haemophilia A is an inherited bleeding disorder characterised by factor VIII (FVIII) deficiency. In  
9 non-severe haemophilia A patients, surgery and bleeding are the main indications for treatment  
10 with FVIII concentrate. A recent study reported that standard dosing frequently results in FVIII  
11 levels (FVIII:C) below or above FVIII target ranges, leading to respectively a bleeding risk or  
12 excessive costs. In addition, FVIII concentrate treatment carries a risk of development of  
13 neutralizing antibodies.  
14  
15

16 An alternative is desmopressin, which releases endogenous FVIII and von Willebrand factor.  
17  
18 In most non-severe haemophilia A patients, desmopressin alone is not enough to achieve FVIII  
19 target levels during surgery or bleeding. We hypothesize that combined pharmacokinetic (PK)  
20 guided administration of desmopressin and FVIII concentrate may improve dosing accuracy and  
21 reduces FVIII concentrate consumption.  
22  
23  
24  
25

### 26 Methods and analysis:

27  
28 In the DAVID study, fifty non-severe haemophilia A patients (FVIII:C  $\geq 0.01$  IU/ml) with a  
29 bleeding episode or undergoing surgery will receive desmopressin and FVIII concentrate  
30 combination treatment. The necessary dose of FVIII concentrate to reach FVIII target levels  
31 after desmopressin administration, will be calculated with a population PK model. The primary  
32 endpoint is the proportion of patients reaching FVIII target levels during the first 72 hours after  
33 start of the combination treatment. This approach was successfully tested in one pilot patient  
34 who received perioperative combination treatment.  
35  
36  
37  
38  
39  
40  
41

### 42 Ethics and dissemination:

43 The DAVID study was approved by the medical ethics committee of the Erasmus MC. Results  
44 of the study will be communicated through publication in international scientific journals and  
45 presentation at (inter)national conferences.  
46  
47  
48  
49

50 Trial registration: NTR5383 ([www.trialregister.nl](http://www.trialregister.nl)), EudraCT: 2014-00535-14  
51  
52  
53  
54  
55  
56  
57  
58  
59  
60

### Strengths and limitations of this study

- The DAVID-study is a multicentre, prospective trial including patients from eight Haemophilia Treatment Centres in the Netherlands.

- Desmopressin and FVIII concentrate combination treatment is an innovative treatment option for non-severe haemophilia A patients.

- By using maximum *a posteriori* Bayesian estimation based on an integrated population pharmacokinetic model and measured FVIII levels, the dosing of FVIII concentrate may be improved, with less FVIII levels above and below target.

- The DAVID study is a single-armed trial.

- The study population is heterogeneous as all types of surgery and bleeding episodes may be included.

## Introduction

Haemophilia A is an X-linked bleeding disorder characterized by a factor VIII (FVIII) deficiency. Non-severe haemophilia A patients (FVIII:C  $\geq$  0.01 IU/ml) suffer from bleeding in the perioperative setting and after (minor) trauma. Treatment consists of either desmopressin or FVIII concentrate.

FVIII concentrate is an effective, but expensive treatment option. With current dosing based on body weight, baseline FVIII:C and target FVIII:C, FVIII:C both below (7-45%) and above (32-81%) FVIII target levels have been observed.<sup>1 2</sup> FVIII:C below target may lead to an increased bleeding risk, whereas levels above target increase the costs. Excessively high FVIII:C may also be associated with thrombosis.<sup>3-5</sup> In addition, high FVIII concentrate doses may induce the development of FVIII neutralizing antibodies, causing ineffectiveness of treatment with FVIII concentrate. In cases where antibodies cross-react with patient's endogenous FVIII they can even cause a severe phenotype with spontaneous bleeding.<sup>6-8</sup> Therefore, dosing within the target range with restriction of FVIII concentrate use is important.

An alternative to FVIII concentrate is desmopressin, a synthetic analogue of vasopressin. It releases von Willebrand factor (VWF) from the endothelium and FVIII, thereby improving haemostasis.<sup>9-11</sup> Although treatment is often effective, FVIII:C response to desmopressin exhibits a high variability between haemophilia A patients. Contributing factors reported in literature are age, baseline FVIII:C and the *F8*-gene mutation.<sup>12-14</sup> However, these factors do not explain the observed variability entirely. In addition, in most patients FVIII:C does not increase sufficiently to prevent perioperative bleeding.

Other limitations of desmopressin are the experienced side effects and tachyphylaxis. Most side effects are mild and transient, such as vasodilation. More severe side-effects like hyponatremia are rare and can usually be prevented by a fluid restriction.<sup>15</sup> Tachyphylaxis occurs when repeated dosages of desmopressin are given with short time intervals (12-24 hours). The decrease in FVIII:C response is approximately 30% from the second dose onwards in case of a 24 hour interval and is believed to be caused by a temporary depletion of VWF and FVIII from the endothelium.<sup>16</sup>

Combined administration of desmopressin and FVIII concentrate may be able to overcome several of the drawbacks of both separate treatment options. However, there is a lack of experience and knowledge with regard to the efficacy and safety of combination treatment. Moreover, optimization of dosing is necessary to get and keep FVIII:C within the target range.

A valuable approach could be pharmacokinetic (PK) guided dosing, where FVIII:C responses of future dosages are predicted based on a population pharmacokinetic model in

1  
2  
3 combination with a limited number (2-3) of FVIII:C measurements, obtained after administration  
4 of desmopressin and/or FVIII concentrate. This technique was previously shown to be effective  
5 in both the prophylactic and perioperative setting in severe and moderate haemophilia A  
6 patients.<sup>17 18</sup>{Hazendonk, 2016 #546}. A prospective trial using PK guided dosing in the perioperative  
7 treatment of moderate and severe haemophilia A patients is ongoing.<sup>19</sup>  
8  
9  
10

11 Therefore, we hypothesize that combined PK guided dosing of desmopressin and FVIII  
12 concentrate may be a feasible treatment option in non-severe haemophilia A patients with a  
13 bleeding episode or undergoing surgery. Our aim is to show that the proportion of patients with  
14 FVIII:C within the FVIII target ranges can be increased by the use of the combination treatment  
15 and PK-guided dosing. In addition, the consumption of FVIII concentrate will be reduced. This  
16 innovative approach in haemophilia treatment may be a promising alternative with an increase  
17 in quality of care and a concomitant cost reduction.  
18  
19  
20  
21  
22

## 23 **Methods and analysis**

### 24 Objectives

25 The primary objective of the DAVID study is to evaluate if combination treatment of  
26 desmopressin and PK-guided dosing of FVIII concentrate is able to increase the proportion of  
27 non-severe haemophilia A patients with FVIII:C within the target range during the first 72 hours  
28 after start of combination treatment compared to historical controls.  
29  
30  
31  
32  
33

### 34 *Secondary objectives:*

- 35 1. To assess FVIII concentrate consumption in all patients.
- 36 2. To acquire data to improve the integrated population PK model for desmopressin  
37 and FVIII concentrate combination treatment
- 38 3. To establish (possible) adverse events of combination treatment; e.g. side effects  
39 of desmopressin, bleeding episodes, development of neutralizing antibodies,  
40 and thrombotic events.
- 41 4. To evaluate the extent of tachyphylaxis after desmopressin treatment.
- 42 5. To perform an economical evaluation to quantify the potential cost reduction of  
43 the combination treatment.
- 44 6. To evaluate the experienced quality of patient care.
- 45
- 46
- 47
- 48
- 49
- 50
- 51
- 52
- 53
- 54
- 55
- 56
- 57
- 58
- 59
- 60

### Design

The DAVID study is a multicentre single-arm trial in non-severe haemophilia A patients with a bleeding episode or in need of a surgical procedure. The study was designed by a project committee existing of members of all participating sites (see Supplementary data 1 and 2). Patients will receive combination treatment of desmopressin and FVIII concentrate instead of the conventional treatment which consists of FVIII concentrate monotherapy.

### Patient selection and recruitment

Non-severe haemophilia A patients  $\geq 12$  years of age with a bleeding episode or undergoing a surgical procedure, requiring FVIII replacement therapy and having a sufficient response to desmopressin, will be included. Patients will be recruited from one of the following haemophilia treatment centres in the Netherlands: Erasmus University Medical Centre Rotterdam, Academic Medical Centre Amsterdam, Leiden University Medical Centre, University Medical Centre Groningen, Radboud university medical centre Nijmegen, University Medical Centre Utrecht, Maxima Medical Centre Eindhoven and Maastricht University Medical Centre (see also Supplementary data 2). They will be approached by telephone or during a visit to the (outpatient) clinic if they present with a bleeding or need a surgical procedure.

#### *Inclusion criteria:*

- Non-severe haemophilia A patients (FVIII:C  $\geq 0.01$  IU/ml)
- Requiring a surgical procedure or having a bleeding episode
- Requiring replacement therapy with FVIII concentrate for at least 48 hours
- Age between 12 and 70 years at study inclusion date
- (Parental) informed consent
- Results of a desmopressin test available (minimal absolute FVIII:C increase  $>0.2$  IU/ml)

#### *Exclusion criteria:*

- Patients with other congenital or acquired haemostatic abnormalities
- Inadequate response to desmopressin (absolute increase in FVIII:C  $<0.2$  IU/ml) during a previous desmopressin test
- FVIII neutralizing antibodies (in medical history), unless successfully treated with immunotolerance induction therapy
- Initiation of FVIII concentrate treatment  $>24$  hours before study inclusion



- 1  
2  
3 - Patients not eligible for desmopressin treatment due to contraindications, e.g.: intolerance,  
4 interactions with co-medication or due to type of surgery  
5

#### 6 Interventions and study procedures

7  
8 All patients will receive combination treatment of desmopressin and FVIII concentrate during a  
9 bleeding episode or in the perioperative setting for at least 48 hours. All patients will receive a  
10 standard dose of desmopressin intravenously (0.3 µg/kg; no maximum dose). In order to  
11 combine both medication regimens, an individualized dosing advice for FVIII concentrate will be  
12 provided by the clinical pharmacologist. The initial dosing advice will be based on the FVIII:C  
13 response observed after a test administration of desmopressin (see below) and previously  
14 collected patient and population pharmacokinetic data after administration of desmopressin  
15 (endogenous FVIII) and FVIII concentrate (exogenous FVIII). The treating physician states the  
16 duration of combination treatment, the mode of administration of FVIII concentrate (continuous  
17 or intermittent administration) and determines FVIII target ranges. During combination treatment  
18 FVIII:C will be assessed regularly. Accordingly dose adjustments for FVIII concentrate will be  
19 made iteratively based on the results of a desmopressin test administration and using Bayesian  
20 analysis. Bayesian analysis will be performed with the NONMEM® software using a dedicated  
21 integrated population model describing the PK of FVIII following both the administration of  
22 desmopressin and FVIII concentrate. As bleeding or acute surgery calls for immediate treatment  
23 and constructing a dosing advice takes time, a patient may be included in the DAVID-study until  
24 24 hours after the start of FVIII concentrate monotherapy.  
25

26 Adherence to the study protocol will be improved by the use of a separate script per included  
27 patient, in which an approximated timeline, contact details and all responsibilities of the involved  
28 research and treatment team are written down.  
29  
30  
31  
32  
33

#### 34 *Concomitant treatment*

35 As patients receive desmopressin, they will have a fluid restriction of 1.5 L per 24 hours, till  
36 24 hours after the last desmopressin administration. Furthermore, all concomitant treatment and  
37 therapeutics are allowed, except for the therapeutics specified in the exclusion criteria. This  
38 means other treatment than desmopressin or factor concentrate necessary to prevent or treat  
39 bleeding, such as tranexamic acid, is allowed as well. The same will apply for prophylactic  
40 treatment to prevent thrombosis. These treatment options will be applied at the discretion of the  
41 treating physician and will be documented for all patients.  
42  
43  
44  
45  
46  
47  
48  
49  
50  
51  
52  
53  
54  
55  
56  
57  
58  
59  
60

### *Desmopressin test administration*

All patients must have undergone a desmopressin test with at least three FVIII:C measurements. If performed during childhood (<18 years), the test is only admissible when performed  $\leq 4$  years before study inclusion. When no desmopressin test has been performed meeting these criteria, the test should be performed with a standard intravenous desmopressin dose of 0.3  $\mu\text{g}/\text{kg}$  infused over 30 minutes with a minimum of three FVIII:C measurements: before the administration of desmopressin, around 1 hour after desmopressin administration for peak measurement and at least one sample thereafter, for example after 4 hours. All time points of blood sampling and end of desmopressin administration should be documented precisely, as well as exact desmopressin dose and duration of infusion.

### *Pharmacokinetic (PK) guided dosing*

In order to provide an individualized dosing advice, a Bayesian analysis will be performed on the basis of an integrated population PK model. This population model has been constructed based on two population pharmacokinetic models: 1) a population PK model of FVIII:C response after desmopressin administration<sup>20</sup> and 2) a population PK model of FVIII:C after administration of FVIII concentrate.<sup>20</sup> This latter model was constructed based on perioperative data from 29 non-severe, adult haemophilia A patients from whom 245 FVIII:C measurements were available. The final model estimated the baseline FVIII:C to which estimated FVIII:C, that followed administration of FVIII concentrate, were added according to a one-compartment model with first-order elimination. Two covariates could be identified after multivariate regression analysis: VWF:Ag had a negative association with clearance and the most recently measured FVIII:C had a positive association with the estimated baseline. In table 1 the most important model characteristics are shown.

The integrated population PK model, used in this study, describes the average PK, including the variability of the baseline FVIII:C and FVIII:C response between and within patients following both the administration of desmopressin and the administration of FVIII concentrate. This model will be used for both the perioperative setting and around bleeding episodes. The individualized dosing advice for the first dose of FVIII concentrate will be provided based on this model along with the results of the desmopressin test administration and the perioperative FVIII target levels. Further dosing of FVIII concentrates will be adjusted daily by iterative maximum *a posteriori* Bayesian analysis based on the population PK model in conjunction with perioperatively measured FVIII:C. In this analysis the following information will be included: 1) FVIII release in response to desmopressin after the test dose 2) baseline FVIII:C and 3) measured FVIII:C (both

1  
2  
3 trough and peak levels)(figure 1 and table 2). Dose adjustments based on this iterative  
4 Bayesian analysis will be performed in NONMEM® software. All dosing advices will be given  
5 one day in advance.  
6

### 7 *Experienced quality of patient care*

8  
9 To assess experienced quality of care during this innovative intervention, two questionnaires will  
10 be given to the patients. Side effects will be assessed using the questionnaire previously  
11 developed and used by Stoof et al..<sup>15</sup> This questionnaire includes the occurrence of seven  
12 different self-reported side effects on a five-point scale and two on a ten-point scale. Side  
13 effects will be evaluated at two time points: before surgery and three days after surgery. In the  
14 second questionnaire (three days after surgery) experienced quality of care will be evaluated  
15 with the addition of three questions dedicated to desmopressin and FVIII concentrate  
16 combination treatment. Patients will report their satisfaction with the combination treatment on a  
17 scale of 1 to 100. They will have the opportunity to explain what is needed to improve the given  
18 grade. Finally, they can state their preference for one of the treatment options: FVIII concentrate  
19 monotherapy or combination treatment. The last question will be only asked to patients who  
20 have a previous experience with FVIII concentrate monotherapy.  
21  
22  
23  
24  
25  
26  
27  
28  
29

### 30 Sample size

31 In the DAVID study, the proportion of patients that reach FVIII target levels with combination  
32 treatment in the first 72 hours postoperatively (without adding off-protocol FVIII concentrates)  
33 will be assessed. Historical data on current FVIII treatment show a proportion of 0.3 of non-  
34 severe haemophilia A patients with FVIII:C within target ranges in this time period.<sup>2</sup> A doubling  
35 of this proportion, leading to a proportion of patients of 0.6, is believed to be clinically relevant.  
36 To study this with a power of 90% and a two-sided significance level of 0.05, a sample size of  
37 minimally 25 patients is needed. As different surgical procedures, both major and minor, may be  
38 performed on included patients and the baseline FVIII:C level may have a wide range  
39 (approximately 0.01-0.60 IU/mL), the included patient population may be heterogeneous. In  
40 addition, patients may drop-out during the perioperative treatment. This may for example be the  
41 case if patients are no longer eligible to receive desmopressin due to changed clinical status.  
42 However, no specific stopping criteria are present. To overcome both the heterogeneity and  
43 possible drop-out, we aim to include 50 patients.  
44  
45  
46  
47  
48  
49  
50  
51

52 To reach our target sample size and ensure we do not miss any patients, all participating  
53 centers will be updated regularly by e-mail, newsletters and during meetings.  
54  
55  
56  
57  
58  
59  
60

## Outcome measures

### *Primary outcome:*

The primary outcome will be the proportion of patients with FVIII trough levels within the FVIII target range during the first 72 hours after start of combination treatment. If a patient has one trough level outside the target range or needs off-protocol FVIII concentrate within the first 72 hours of combination the treatment, the primary endpoint is not reached in that patient. Off-protocol FVIII concentrate is defined as all administered FVIII concentrate outside the PK-guided dosing advice as given by the clinical pharmacologist. FVIII:C will be targeted according to the Dutch Treatment Guideline (Table 3).<sup>21</sup> The treating physician may deviate from the guideline and set different target ranges, based on bleeding phenotype/history or type of surgery.

FVIII:C measurements will be performed with the one-stage assay. Each participating may use its own assay. However, all centers are certified and accredited.

### *Secondary outcomes:*

- FVIII concentrate consumption, expressed as the total amount of administered units of FVIII concentrate per kilogram per patient;
- Number and nature of adverse events during combined treatment;
- Incidence and severity of bleeding, where the severity of bleeding will be graded according to the ISTH criteria for major and minor bleeding,<sup>22 23</sup>
- Incidence of FVIII neutralizing antibodies; measured with the Bethesda assay
- Incidence of thrombosis, where thrombosis will be defined according to the Dutch guidelines on thrombosis, myocardial infarctions and strokes;<sup>24 25</sup>
- Incidence and extent of tachyphylaxis, defined as a reduction in the absolute increase in FVIII:C after the second and third desmopressin infusion;
- Medical costs and an economic evaluation;
- Experience quality of patient care, measured by a questionnaire

## Data analysis plan

All baseline characteristics will be described as means and standard deviations or medians with interquartile ranges, dependent on whether the parameter is normally distributed. The primary outcome, the proportion of patients within FVIII target ranges, will be analysed by a chi-square test. Retrospective data will be used as a reference, as the DAVID-study only has one study arm.<sup>2</sup> Pharmacokinetic data will be analysed using the NONMEM® software package.

1  
2  
3 Tachyphylaxis of FVIII:C response to desmopressin will be analysed with a paired t-test. Other  
4 secondary outcomes will be documented in a descriptive manner, except for the economic  
5 analysis.  
6  
7

### 8 9 *Economic analysis*

10 An economic evaluation will be performed from a health care perspective from the day of  
11 surgery to 90 days postoperatively. The cost-effectiveness of combined treatment will be  
12 assessed by calculating the incremental cost-effectiveness ratio (ICER), defined as the  
13 difference in costs of combined treatment, compared to usual care, divided by the average  
14 change in effectiveness. Actual medical costs will be calculated by multiplying the volumes of  
15 healthcare use with the corresponding unit prices. Perioperative data resource use  
16 (desmopressin, FVIII concentrates, additional FVIII:C and VWF measurements, PK-profiling) will  
17 be collected from medical files. Usual medical costs (to compare to combination treatment  
18 costs) will be calculated based on a treatment protocol as it would have been without  
19 desmopressin use, taking into account patient's body weight, baseline FVIII:C and type of  
20 surgery. The reduction in costs will be represented by the usual medical costs (units of FVIII  
21 concentrates) minus the actual medical costs for combined treatment (units of FVIII  
22 concentrates, µg of desmopressin, extra FVIII:C measurements). An additional sensitivity  
23 analysis will be performed to assess the stability of the results to changes in costs and  
24 effectiveness parameters. The primary effectiveness parameter is the proportion of patients  
25 reaching FVIII target levels with desmopressin and FVIII concentrate combination treatment.  
26 The secondary effectiveness parameter is the frequency of adverse events during combination  
27 treatment.  
28  
29  
30  
31  
32  
33  
34  
35  
36  
37  
38  
39  
40

### 41 Patient and Public Involvement

42 During the development of this study we worked closely together with the Netherlands  
43 Haemophilia Patient Society (NVHP). One representative of the NVHP is member of the project  
44 committee and helped us with the study design. Moreover, 5 members of the NVHP were  
45 invited to comment on the patient information. The design and information were adjusted  
46 according to their opinions and questions. The final results of the DAVID study will be  
47 communicated through scientific international journals and at international conferences. One  
48 major conference may be that of the World Federation of Haemophilia, attended by both  
49 physicians, researchers and patients from all over the world. In addition, the results will be  
50  
51  
52  
53  
54  
55  
56  
57  
58  
59  
60

1  
2  
3 communicated in the magazine of the NVHP. Finally, results will also be implemented in the  
4 treatment guidelines and patient information will be adjusted accordingly.

### 6 Proof of concept

7  
8 As a proof of concept, we present one case of a patient that was treated with desmopressin and  
9 FVIII concentrate combination treatment for the duration of 24 hours. This patient has signed a  
10 BMJ consent form to publish his information in this manuscript. The patient was a 53 year old  
11 male with moderate severe haemophilia A (FVIII:C 0.04 IU/ml). His body weight was 100 kg. He  
12 was in need of dental surgery and needed treatment to prevent bleeding. He received an  
13 infusion of desmopressin (0.3 µg/kg) over 30 minutes, followed 30 minutes later by FVIII  
14 concentrate in a dose of 25 IU/kg (2500 IU). He received a second dose of FVIII concentrate (20  
15 IU/kg; i.e. 2000 IU) in the evening to maintain his FVIII:C above target values. Both FVIII  
16 concentrate dosages were determined using the integrated PK model and based on the  
17 patient's response to a previous desmopressin dose and a previous FVIII concentrate  
18 administration. Figure 2 shows the measured FVIII:C and the FVIII:C as predicted by the  
19 integrated PK model. All measured FVIII:C levels were within 0.10 IU/ml of the predicted levels  
20 (Figure 2). The patient only had mild side effects of desmopressin, i.e. flushing and mild  
21 tachycardia (101 bpm). To prevent bleeding, he was also treated with tranexamic acid for  
22 multiple days. No bleeding was reported before and after the surgery. However, because of a  
23 possible infection of the wound he was treated with antibiotics.

24  
25 If this patient would not have received combination treatment, he would have been treated  
26 with FVIII concentrate monotherapy both before and after the dental surgery. As his baseline  
27 FVIII:C was 0.04 IU/mL, his body weight 100 kg and the target FVIII peak level was 0.80-1.00  
28 IU/mL, the FVIII loading dose would be  $(1.00-0.04)/0.02*100=4750$  IU (rounded to entire vials).  
29 In the evening the patient would have received 2500 IU to maintain the FVIII:C between the  
30 target FVIII. Therefore, combination treatment hypothetically saved 2750 IU FVIII concentrate in  
31 this patient.  
32

### 33 **Ethics and dissemination**

34  
35 The study was approved by the Medical Ethics Committee of the Erasmus University Medical  
36 Centre Rotterdam, the Netherlands. The study will be conducted according to GCP guidelines  
37 and the Declaration of Helsinki. Also see Supplementary data 3-6 for our regulations for data  
38 storage, amendments and compensation for injury. Written informed consent will be obtained  
39 from all patients by a member of the research team (See Supplementary data 7 for the patient  
40 information, Dutch only). Results of the study will be communicated to the (inter)national  
41  
42  
43  
44  
45



1  
2  
3 medical and scientific community through publication in high-ranking peer reviewed international  
4 journals and at (inter)national medical scientific conferences. Results of the study will also be  
5 implemented in the Dutch Haemophilia Treatment Guidelines. Hopefully the international society  
6 of Haemophilia Treatment Centres will adapt the results in their guidelines as well.  
7  
8  
9

#### 10 Data monitoring committee and serious adverse events

11 This study does not carry any large safety risks as both FVIII concentrates and desmopressin  
12 are registered therapeutics for haemophilia treatment. In addition, to guarantee safety for all  
13 patients in this study, FVIII:C levels will be closely monitored to prevent any additional bleeding  
14 risks. Therefore a data safety monitoring board is not needed.  
15  
16  
17  
18

19 Serious adverse events (SAE) will be communicated to the sponsor within 24 hours. The  
20 sponsor will register the SAE within 15 days on *ToetsingOnline*, the Dutch registration system  
21 for SAEs.  
22  
23  
24

#### 25 **Registration**

26 The trial is registered in the Dutch Trial Registry, number NTR5383 ([www.trialregister.nl](http://www.trialregister.nl)) and in  
27 EudraCT: 2014-00535-14.  
28  
29  
30

#### 31 **Discussion**

32 This prospective trial will allow us to evaluate the safety and efficacy of combination treatment  
33 of desmopressin and FVIII concentrate in reaching target FVIII:C during bleeding episodes and  
34 in the perioperative setting. Dosing of FVIII concentrate will be determined by an integrated  
35 population PK model developed specifically for non-severe haemophilia A patients to be treated  
36 with combination treatment. Fifty non-severe haemophilia A patients will be included from eight  
37 haemophilia treatment centres in the Netherlands to reach our aim.  
38  
39  
40  
41

42 The DAVID study has some limitations. First, this study is not designed as a randomized  
43 controlled trial; it does not include a control group. Therefore, no direct comparison to standard  
44 treatment will be possible. However, we performed an extensive retrospective cohort study to  
45 determine the effectiveness of current clinical practice in which 37 patients undergoing 52  
46 surgeries, were evaluated.<sup>2</sup> Moreover, the amount of FVIII concentrate that would have been  
47 administered to the patients included in the DAVID study as if desmopressin was not  
48 administered and as if no PK-guided dosing was applied, will be calculated.  
49  
50  
51  
52

53 The second limitation is the heterogeneity of the study population. All types of surgery,  
54 unless not compatible with desmopressin treatment, may be included in the study. To limit the  
55  
56  
57  
58  
59  
60

1  
2  
3 effects of this heterogeneity, only patients with an expected treatment duration of at least 48  
4 hours will be included. Moreover, the data that were used to develop the integrated population  
5 PK model also included data from various types of surgery.  
6  
7

### 8 9 **Conclusion**

10 In the DAVID study, efficacy and safety of desmopressin and FVIII concentrate combination  
11 treatment in non-severe haemophilia A patients will be determined. Using this innovative  
12 approach treatment of non-severe haemophilia A patients both during bleeding episodes and in  
13 the perioperative setting may be improved.  
14  
15  
16

### 17 18 **Authors' contribution**

19 MK, MCn, FL and RM designed the study and critically revised the manuscript. LS, SP and RH  
20 wrote the manuscript and refined the study design. MD, KF, EB, MCo, JE, BL-G, KM, LN and  
21 EM critically revised the manuscript and refined the study design.  
22

23 We would like to specially thank MD for her contribution on behalf of the NVHP and the five  
24 NVHP members who helped to improve the patient information. In addition we would like to  
25 thank the pilot patient for his cooperation and for letting us use his case as an example.  
26  
27

### 28 29 **Funding statement**

30 This work was supported by ZonMw, (grant number 836031003), the Dutch organisation for  
31 Health Research and Development.  
32  
33

### 34 35 **Competing interest statement**

36 L.M. Schütte; received reimbursement from CSL-Behring for attending a symposium, not related  
37 to this study.  
38

39 M.H. Cnossen; received unrestricted research/educational funding for various projects as well  
40 as travel fees from the following institutions and companies: ZonMW, Innovatiefonds, Pfizer,  
41 Baxalta/Shire, Bayer Schering Pharma, Novo Nordisk, Novartis, Roche and CSL Behring, all not  
42 related to this study.  
43

44 R.M. van Hest, E.A.M. Beckers, M. Coppens, M. Driessens, L. Nieuwenhuizen, S.Polinder:  
45 nothing to disclose relevant to the DAVID study.  
46

47 K. Fijnvandraat: is a member of the European Hemophilia Treatment and Standardization Board  
48 sponsored by Baxter, has received unrestricted research grants from CSL Behring and Bayer,  
49 and has given lectures at educational symposiums organized by Pfizer, Bayer and Baxter.  
50

51 J. Eikenboom: received research funding from CSL Behring and honorarium for educational  
52 activity from Roche, not related to this study.  
53  
54  
55  
56  
57



1  
2  
3 B.A.P. Laros-van Gorkom: received unrestricted educational grants from Baxter and CSL  
4 Behring, and speaker fees from Sanquin.

5  
6 K. Meijer: research support from Bayer, Sanquin and Pfizer; speaker fees from Bayer, Sanquin,  
7 Boehringer Ingelheim, BMS and Aspen; consulting fees from Uniqure, not related to this study  
8 F.W.G. Leebeek; received unrestricted research grants from CSL-Behring and Baxalta/Shire not  
9 related to this study. He is consultant for Shire, NovoNordisk and UniQure. Fees go to the  
10 university.  
11

12  
13 R.A.A. Mathôt: received personal fees from Merck Sharp & Dohme and Zeria and grants from  
14 Bayer, UCB Pharma and Hoffman La Roche with no involvement in this study.

15  
16 M.J.H.A.Kruip; received unrestricted research grants from Pfizer, Innovatiefonds and Ferring  
17 with no involvement in this study.  
18  
19  
20  
21

## 22 References

- 23 1. Hazendonk HC, Lock J, Mathot RA, et al. Perioperative treatment of hemophilia A patients:  
24 blood group O patients are at risk of bleeding complications. *J Thromb Haemost*  
25 2016;**14**(3):468-78.
- 26 2. Schütte LM, de Rooij N, Hazendonk HCAM, et al. Perioperative FVIII Concentrate Treatment  
27 in Mild Hemophilia a Patients Shows a High Rate of Overdosing - David/Opti-Clot  
28 Studies. *Blood* 2015;**126**(23):3510-10.
- 29 3. Ritchie B, Woodman RC, Poon MC. Deep venous thrombosis in hemophilia A. *Am J Med*  
30 1992;**93**(6):699-700.
- 31 4. Escuriola Ettingshausen C, Martinez Sagner I, Kreuz W. Portal vein thrombosis in a patient  
32 with severe haemophilia A and F V G1691A mutation during continuous infusion of F VIII  
33 after intramural jejunal bleeding - Successful thrombolysis under heparin therapy.  
34 *European Journal of Pediatrics, Supplement* 1999;**158**(3):S180-S82.
- 35 5. Russell Z, Riconda D, Pollack L, et al. Thrombosis in a pregnant hemophilia A carrier after  
36 intrapartum recombinant factor VIII. *Obstet Gynecol* 2005;**105**(4):875-6.
- 37 6. Eckhardt CL, Menke LA, van Ommen CH, et al. Intensive peri-operative use of factor VIII and  
38 the Arg593-->Cys mutation are risk factors for inhibitor development in mild/moderate  
39 hemophilia A. *J Thromb Haemost* 2009;**7**(6):930-7.
- 40 7. Astermark J. FVIII inhibitors: pathogenesis and avoidance. *Blood* 2015;**125**(13):2045-51.
- 41 8. d'Oiron R, Pipe SW, Jacquemin M. Mild/moderate haemophilia A: new insights into molecular  
42 mechanisms and inhibitor development. *Haemophilia* 2008;**14 Suppl 3**:138-46.
- 43 9. Kaufmann JE, Vischer UM. Cellular mechanisms of the hemostatic effects of desmopressin  
44 (DDAVP). *J Thromb Haemost* 2003;**1**(4):682-9.
- 45 10. Mannucci. Desmopressin (DDAVP) in the treatment of bleeding disorders. *World federation*  
46 *of hemophilia* 2012.
- 47 11. Pan J, Dinh TT, Rajaraman A, et al. Patterns of expression of factor VIII and von Willebrand  
48 factor by endothelial cell subsets in vivo. *Blood* 2016.
- 49 12. Stoof SC, Sanders YV, Petrij F, et al. Response to desmopressin is strongly dependent on  
50 F8 gene mutation type in mild and moderate haemophilia A. *Thromb Haemost*  
51 2013;**109**(3):440-9.
- 52 13. Nance D, Fletcher SN, Bolgiano DC, et al. Factor VIII mutation and desmopressin-  
53 responsiveness in 62 patients with mild haemophilia A. *Haemophilia* 2013;**19**(5):720-6.
- 54  
55  
56  
57  
58  
59  
60

14. Castaman G, Mancuso ME, Giacomelli SH, et al. Molecular and phenotypic determinants of the response to desmopressin in adult patients with mild hemophilia A. *J Thromb Haemost* 2009;**7**(11):1824-31.
15. Stoof SC, Cnossen MH, de Maat MP, et al. Side effects of desmopressin in patients with bleeding disorders. *Haemophilia* 2016;**22**(1):39-45.
16. Mannucci PM, Bettega D, Cattaneo M. Patterns of development of tachyphylaxis in patients with haemophilia and von Willebrand disease after repeated doses of desmopressin (DDAVP). *Br J Haematol* 1992;**82**(1):87-93.
17. Björkman S. Limited blood sampling for pharmacokinetic dose tailoring of FVIII in the prophylactic treatment of haemophilia A. *Haemophilia* 2010;**16**(4):597-605.
18. Hazendonk H, Fijnvandraat K, Lock J, et al. A population pharmacokinetic model for perioperative dosing of factor VIII in hemophilia A patients. *Haematologica* 2016.
19. Hazendonk HC, van Moort I, Fijnvandraat K, et al. The "OPTI-CLOT" trial. A randomised controlled trial on periOperative Pharmacokinetic-guided dosing of CLOTting factor concentrate in haemophilia A. *Thromb Haemost* 2015;**114**(3):639-44.
20. Schutte LM, van Hest RM, Stoof SCM, et al. Pharmacokinetic Modelling to Predict FVIII:C Response to Desmopressin and Its Reproducibility in Nonsevere Haemophilia A Patients. *Thromb Haemost* 2018.
21. Leebeek FWG, Mauser-Bunschoten EP. *Diagnostiek en behandeling van hemofilie en aanverwante hemostasestoornissen : richtlijn*. Alphen aan den Rijn: Van Zuiden Communications, 2009.
22. Kaatz S, Ahmad D, Spyropoulos AC, et al. Definition of clinically relevant non-major bleeding in studies of anticoagulants in atrial fibrillation and venous thromboembolic disease in non-surgical patients: communication from the SSC of the ISTH. *J Thromb Haemost* 2015;**13**(11):2119-26.
23. Schulman S, Kearon C, Subcommittee on Control of Anticoagulation of the S, et al. Definition of major bleeding in clinical investigations of antihemostatic medicinal products in non-surgical patients. *J Thromb Haemost* 2005;**3**(4):692-4.
24. Kwaliteitsinstituut voor de Gezondheidszorg, C. B. O. *Diagnostiek, preventie en behandeling van veneuze trombo-embolie en secundaire preventie van arteriële trombose*. Alphen aan den Rijn: Van Zuiden Communications, 2008.
25. Kwaliteitsinstituut voor de Gezondheidszorg CBO. *Diagnostiek, behandeling en zorg voor patiënten met een beroerte : richtlijn*. Utrecht: Nederlandse Vereniging voor Neurologie; Utrecht: Kwaliteitsinstituut voor de Gezondheidszorg CBO, 2008.

## Legends to tables and figures

### Table 1: Model characteristics of the population PK model for FVIII concentrates

The covariate associations between VWF:Ag and clearance were modeled as a nonlinear function, while the association between most recent FVIII:C and baseline FVIII:C was modeled as a linear function. The numbers for the covariate associations (-0.285 and 0.891) describe both the shape and magnitude of the covariate effect: the more the number deviates from 0 the larger the effect of a covariate on the PK parameter. RSE = relative standard error; VWF:Ag = von Willebrand factor antigen; IOV = Inter-occasion variability

### Table 2: Overview of blood sampling for FVIII:C measurements

Grey: obligatory measurements

† only in case of elective surgery, otherwise before first desmopressin administration

‡ pre = before desmopressin, post = after desmopressin, peak = after FVIII-concentrate, post-treat = after surgery; in case of bleeding; 2-6 hours after desmopressin, trough = before next dose of FVIII-concentrate

± pre = before desmopressin, post = after desmopressin, peak = after loading dose FVIII-concentrate, post-treat = after surgery; in case of bleeding: 2-6 hours after desmopressin, pre-adjust = before dosage, steady state = FVIII-measurement at random time point

FVIII measurements are shown here until day 3 after start of combination treatment. Monitoring will continue if treatment is still necessary.

### Table 3: Target ranges for FVIII:C in IU/ml in the perioperative setting<sup>21</sup>

### Figure 1: Flowchart of study

### Figure 2: FVIII:C course after desmopressin and FVIII concentrate combination treatment

in a pilot patient with moderate haemophilia A (FVIII:C 0.04 IU/ml). T<sub>0</sub> = preoperative desmopressin infusion. Lines are the predicted FVIII:C. Predictions were based on a previous desmopressin test dose and FVIII concentrate administration, prior to study inclusion. Solid line is total FVIII:C and can be measured. Open circles are measured FVIII:C. Infusions of desmopressin and FVIII concentrate (FVIII con.) are depicted with arrows.

**Table 1: Model characteristics of the population PK model for FVIII concentrates**

| Parameter                               | Population estimate | RSE (%) |
|-----------------------------------------|---------------------|---------|
| Baseline FVIII:C (IU/ml)                | 0.211               | 10.9    |
| Clearance (ml/h)                        | 208                 | 10      |
| Volume of distribution (ml)             | 3400                | 4.9     |
| Proportional error (%)                  | 17.3                | 8.4     |
| VWF:Ag on clearance                     | -0.285              | 5.4     |
| Most recent FVIII:C on baseline FVIII:C | 0.891               | 15.8    |
| IOV of baseline FVIII:C (%)             | 54.7                | 11.0    |
| IIV of clearance (%)                    | 37.4                | 19.7    |
| IIV of volume of distribution (%)       | 20.8                | 26.8    |

The covariate associations between VWF:Ag and clearance was modeled as a nonlinear function, while the association between most recent FVIII:C and baseline FVIII:C was modeled as a linear function. The numbers for the covariate associations (-0.285 and 0.891) describe both the shape and magnitude of the covariate effect: the more the number deviates from 0 the larger the effect of a covariate on the PK parameter. RSE = relative standard error; VWF:Ag = von Willebrand factor antigen; IOV = inter-occasion variability; IIV = Inter-individual variability

**Table 2: Overview of blood sampling for FVIII:C measurements**

|                             | Within 4 weeks before surgery† | D0 = Day of first desmopressin infusion |      |      |            |     | D1   |            |     | D2   |            |              | D3 | 4-8 weeks after FVIII treatment |
|-----------------------------|--------------------------------|-----------------------------------------|------|------|------------|-----|------|------------|-----|------|------------|--------------|----|---------------------------------|
| Time – bolus infusions‡     | baseline                       | pre                                     | post | peak | post-treat | pre | post | peak       | pre | post | peak       | trough       |    |                                 |
| Time – continuous infusion‡ | baseline                       | pre                                     | post | peak | post-treat | pre | post | pre-adjust | pre | post | pre-adjust | steady state |    |                                 |
| Primary endpoint            |                                |                                         |      |      |            | X   |      |            | X   |      |            | X            |    |                                 |
| Sodium                      | X                              | X                                       |      |      |            | X   |      |            | X   |      |            | X            |    |                                 |
| Neutralizing antibodies     | X                              |                                         |      |      |            |     |      |            |     |      |            |              | X  |                                 |

Grey: obligatory measurements

† only in case of elective surgery, otherwise before first desmopressin administration

‡ pre = before desmopressin, post = after desmopressin, peak = after FVIII-concentrate, post-treat = after surgery; in case of bleeding; 2-6 hours after desmopressin, trough = before next dose of FVIII-concentrate

‡ pre = before desmopressin, post = after desmopressin, peak = after loading dose FVIII-concentrate, post-treat = after surgery; in case of bleeding: 2-6 hours after desmopressin, pre-adjust = before dosage, steady state = FVIII-measurement at random time point

FVIII measurements are shown here until day 3 after start of combination treatment. Monitoring will continue if treatment is still necessary.

**Table 3: Target ranges for FVIII:C in IU/ml in the perioperative setting<sup>21</sup>**

| Time                 | FVIII target level (IU/ml) |
|----------------------|----------------------------|
| Day 0 (hour 0-24)    | 0.8-1.0 (peak)             |
| Day 1-4 (hour 24-96) | 0.5-0.8 (trough)           |
| Day ≥ 5 (hour > 96)  | 0.3-0.5 (trough)           |

1  
2  
3  
4  
5  
6  
7  
8  
9  
10  
11  
12  
13  
14  
15  
16  
17  
18  
19  
20  
21  
22  
23  
24  
25  
26  
27  
28  
29  
30  
31  
32  
33  
34  
35  
36  
37  
38  
39  
40  
41  
42  
43  
44  
45  
46  
47  
48  
49  
50  
51  
52  
53  
54  
55  
56  
57  
58  
59  
60

For peer review only

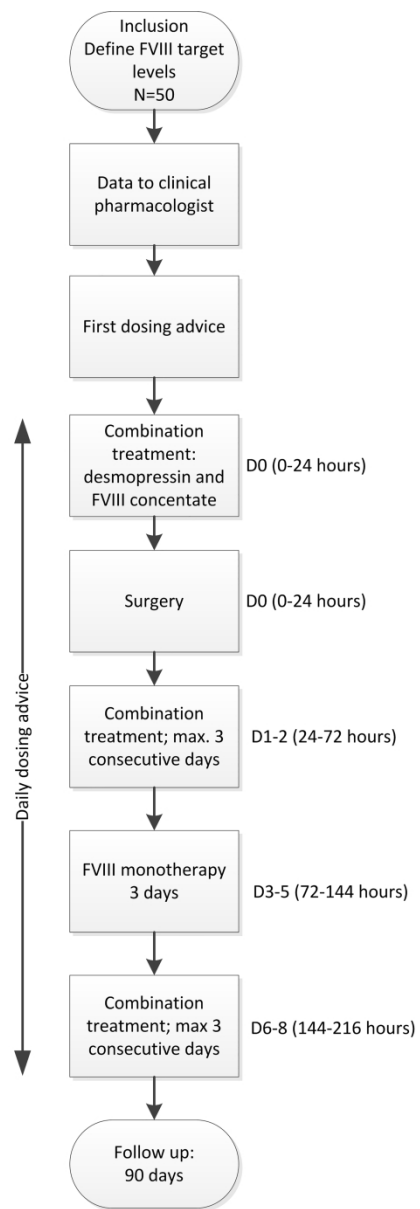

Figure 1: Flowchart of study

263x773mm (300 x 300 DPI)



Figure 2: FVIII:C course after desmopressin and FVIII concentrate combination treatment in a pilot patient with moderate haemophilia A (FVIII:C 0.04 IU/ml). T<sub>0</sub> = preoperative desmopressin infusion. Lines are the predicted FVIII:C. Predictions were based on a previous desmopressin test dose and FVIII concentrate administration, prior to study inclusion. Solid line is total FVIII:C and can be measured. Open circles are measured FVIII:C. Infusions of desmopressin and FVIII concentrate (FVIII con.) are depicted with arrows.

246x171mm (300 x 300 DPI)



## Supplementary data

- 1) Steering committee
- 2) Participating centres
- 3) Handling and storage of data and documents
- 4) Amendments
- 5) Compensation for injury
- 6) Access to final trial dataset
- 7) Model for patient information and informed consent form (Dutch only)

For peer review only

## 1) Steering committee

| Function                         | Contact data                                                                                                                                                                                                                 |
|----------------------------------|------------------------------------------------------------------------------------------------------------------------------------------------------------------------------------------------------------------------------|
| Project Leader                   | Dr. M.J.H.A. Kruip, haematologist<br>T: 010-7033123, E: <a href="mailto:m.kruip@erasmusmc.nl">m.kruip@erasmusmc.nl</a><br>Department of Haematology, Erasmus University<br>Medical Centre<br>Postbus 2040, 3000 CA Rotterdam |
| Sponsor                          | Prof. Dr. F.W.G. Leebeek, haematologist<br>T:010-7033123, E: <a href="mailto:f.leebeek@erasmusmc.nl">f.leebeek@erasmusmc.nl</a><br>Department of Haematology, Erasmus University<br>Medical Centre                           |
| Co-project leader                | Dr. M.H. Cnossen, paediatric haematologist<br>T:010-7036691, E: <a href="mailto:m.cnossen@erasmusmc.nl">m.cnossen@erasmusmc.nl</a><br>Department of Paediatric Haematology, Erasmus<br>University Medical Centre             |
| Co-project leader                | Prof.dr. R.A.A. Mathôt, clinical pharmacologist<br>T:020-5663474, E: <a href="mailto:r.mathot@amc.uva.nl">r.mathot@amc.uva.nl</a><br>Pharmacy, Amsterdam UMC                                                                 |
| Project Advisor                  | Dr. M.H.E. Driessens<br>T:06-12192825020-6599021, E: <a href="mailto:m.driessens@nvhp.nl">m.driessens@nvhp.nl</a><br>Dutch Society of Haemophilia Patients                                                                   |
| Promotor                         | Prof. dr. F.W.G. Leebeek, haematologist<br>T:010-7033123, E: <a href="mailto:f.leebeek@erasmus.nl">f.leebeek@erasmus.nl</a><br>Department of Haematology, Erasmus University<br>Medical Centre                               |
| Member of the steering committee | Dr. C.J. Fijn Van Draat<br>T: 020-5669111, E: <a href="mailto:c.j.fijnvandraat@amc.uva.nl">c.j.fijnvandraat@amc.uva.nl</a><br>Department of Paediatric Haematology, Amsterdam<br>UMC                                         |
| Member of the steering committee | Dr. S. Polinder<br>T: 010-7043954, E: <a href="mailto:s.polinder@erasmusmc.nl">s.polinder@erasmusmc.nl</a><br>Department of Public Health, Erasmus University<br>Medical Centre                                              |

## 2) List of participating centres

| Medical Centre                                         | Member and contact data                                                                                                                     |
|--------------------------------------------------------|---------------------------------------------------------------------------------------------------------------------------------------------|
| <b>Erasmus University Medical Centre</b>               | Dr. M.J.H.A. Kruip, hematologist<br>T: 010-7033123, E: m.kruip@erasmusmc.nl<br>Department of Haematology<br>Postbus 2040, 3000 CA Rotterdam |
| <b>Amsterdam University Medical Centres</b>            | Dr. M. Coppens<br>Department of haematology<br>m.coppens@amc.uva.nl                                                                         |
| <b>Leiden University Medical Centre</b>                | Prof. Dr. H.C.J. Eikenboom<br>Department of internal medicine, division of Thrombosis<br>and Haemostasis<br>h.c.j.eikenboom@lumc.nl         |
| <b>University Medical Centre Groningen</b>             | Prof. dr. K. Meijer<br>Department of Haematology<br>k.meijer@umcg.nl                                                                        |
| <b>Radboud University Medical Centre,<br/>Nijmegen</b> | Dr. B.A.P. Laros-van Gorkom<br>Department of Haematology<br>britta.laros-vangorkom@radboudumc.nl                                            |
| <b>Maxima Medical Centre, Eindhoven</b>                | Dr. L. Nieuwenhuizen<br>Department of Haematology<br>l.nieuwenhuizen@mmc.nl                                                                 |
| <b>University Medical Centre Utrecht</b>               | Dr. E.P. Mauser-Bunschoten<br>Van Creveldkliniek, Department of Haematology<br>e.mauserbunschoten@umcutrecht.nl                             |
| <b>Maastricht University Medical Centre</b>            | Dr. E.A.M. Beckers<br>Department of Haematology<br>eam.beckers@mumc.nl                                                                      |

### 3) Handling and storage of data and documents

All data will be handled confidentially. To assure anonymity of all participating subjects, data will be coded. Only the different investigators at the participating sites and the treating physician will be able to match the study number to the patient's file by matching this number to the patient's hospital registration number. Handling of data will be done according to the Dutch Personal Data Protection Act. DNA and blood samples will be handled confidentially and stored in the hemostasis laboratory at the Erasmus MC. The material will be stored for a maximum of fifteen years.

For peer review only

#### 4) Amendments

Amendments are changes made to the research after a favourable opinion by the accredited METC has been given. All substantial amendments will be notified to the METC and to the competent authority. Non-substantial amendments will not be notified to the accredited METC and the competent authority, but will be recorded and filed by the sponsor. All amendments will be communicated to all participating centres by the trial coordinator. Changes regarding inclusion and exclusion criteria or study design, will also be communicated to [www.trialregister.nl](http://www.trialregister.nl) (NTR 5383).

For peer review only

## 5) Compensation for injury

The sponsor/investigator has a liability insurance which is in accordance with article 7, subsection 9 of the WMO. The sponsor/investigator has a liability insurance which is in accordance with article 7 of the WMO. The sponsor (also) has an insurance which is in accordance with the legal requirements in the Netherlands (Article 7 WMO). This insurance provides cover for damage to research subjects through injury or death caused by the study. The insurance applies to the damage that becomes apparent during the study or within 4 years after the end of the study.

For peer review only

## 6) Access to final trial dataset

The sponsor of the DAVID study will have access to the final dataset and will be the owner of all study data. However, all participating centres have access to their own data and will have permission to use these data for non-commercial research within their own centre and to improve patient care. All publications regarding the DAVID study will be coordinated by the project leader. Other centres than the sponsor site may only publish data after permission from the sponsor and if the sponsor is not publishing the data within a fair amount of time after the study and data analysis has ended. All participating centres have contractual agreements with the sponsor regarding these matters.

In addition the sponsor has an agreement with the funder. The funder will be co-owner of the final dataset. All data has to be available for future research. The sponsor is obliged to publish all study data unless publication does not serve any public interest.

## 7) Model for patient information and informed consent form (Dutch only)

### Informatiebrief DAVID-studie

Geachte patiënt,

Graag willen wij u met deze brief informeren over de DAVID-studie. DAVID staat voor *DDAVP treatment combIneD with factor VIII clotting factor concentrates in patients with mild hemophilia A*. Dit betekent: combinatiebehandeling van DDAVP en factor VIII-concentraten in patiënten met milde en matige hemofilie A.

U krijgt deze brief, omdat we willen vragen of u deel wilt nemen aan de DAVID-studie. Lees deze brief rustig door en neem de tijd om na te denken over het al dan niet deelnemen aan de DAVID-studie. Bespreek het eventueel ook met uw partner, vrienden of familie. Lees ook de algemene brochure. Daarin staat veel algemene informatie over medisch-wetenschappelijk onderzoek. Heeft u na het lezen nog vragen? Dan kunt u altijd terecht bij uw behandelend arts of de onderzoeker. Ook is er een onafhankelijke arts, die veel weet van het onderzoek. Aan het einde van deze brief vindt u de contactgegevens.

### Inleiding

U bent onder behandeling in verband met milde of matige hemofilie A, een zeldzame, erfelijke stoornis in de bloedstolling. Hierbij heeft u te weinig stollingsfactor VIII (factor VIII). Daardoor loopt u meer risico op bloedingen, zoals bij een kleine verwonding of tijdens een operatie. De behandeling hiervoor bestaat meestal uit het geven van factor VIII-concentraat, de ontbrekende stollingsfactor. Factor VIII-concentraat gedraagt zich in ieder lichaam anders. Dit betekent dat de ene patiënt meer factor VIII-concentraat nodig heeft dan de andere patiënt. Daar wordt nu niet genoeg rekening mee gehouden. Hierdoor krijgen sommige patiënten mogelijk te veel factor VIII-concentraat toegediend, terwijl andere patiënten juist te weinig krijgen.

Patiënten met milde en matige hemofilie A hebben nog een kleine hoeveelheid eigen factor VIII in het bloed en worden in sommige gevallen met DDAVP behandeld. Dit medicijn zorgt ervoor dat het eigen, opgeslagen factor VIII vrijkomt in het bloed. DDAVP is vaak niet voldoende om het factor VIII-gehalte in het bloed hoog genoeg te krijgen bij operaties. Een oplossing is om DDAVP te combineren met factor VIII-concentraat. Het factor VIII-gehalte stijgt dan in eerste instantie door de DDAVP. Vervolgens wordt er zo veel factor VIII-concentraat bijgegeven dat er voldoende factor VIII in het bloed zit. In deze studie willen wij bestuderen of de combinatiebehandeling goed werkt.

#### 1. Wat is het doel van het onderzoek?

We willen onderzoeken of patiënten rondom operaties en bloedingen de juiste factor VIII-waarden in het bloed bereiken wanneer ze behandeld worden met een combinatiebehandeling van DDAVP en factor VIII-concentraat. Als dit het geval is, dan kan de combinatiebehandeling in de toekomst standaard gebruikt gaan worden. Dit zal er hopelijk toe leiden dat er minder factor VIII-concentraat nodig is. Wij willen dit bereiken zonder dat de behandeling slechter of minder veilig wordt.

Daarnaast willen we nagaan of de benodigde hoeveelheid factor VIII-concentraat per patiënt kan worden bepaald door van alle deelnemers aan de DAVID-studie verschillende gegevens te verzamelen.

#### 2. Welke behandeling wordt onderzocht?

Tijdens dit onderzoek wordt de combinatiebehandeling van DDAVP en factor VIII-concentraat onderzocht. Beide medicijnen worden al gebruikt bij milde en matige hemofilie A-patiënten en u heeft ze mogelijk al eens gehad.



### 3. Hoe wordt het onderzoek uitgevoerd?

Iedereen die deelneemt aan dit onderzoek krijgt minimaal 2 dagen een combinatiebehandeling van DDAVP en factor VIII-concentraat rondom een operatie of een bloeding.

De combinatiebehandeling begint bij voorkeur vlak voor de ingreep. In het geval van een spoedingreep of bloeding kan het zijn dat u eerst maximaal 24 uur behandeld wordt met FVIII-concentraat voordat de combinatiebehandeling begint. De combinatiebehandeling duurt in eerste instantie maximaal drie aaneengesloten dagen. Dagelijks krijgt u eenmaal DDAVP toegediend via een infuus. Aansluitend krijgt u factor VIII-concentraat toegediend via een infuus, om de juiste factor VIII-waarden te bereiken. Afhankelijk van hoe lang u behandeling nodig heeft, beslist uw eigen arts of u van dag 6 t/m 8 opnieuw de combinatiebehandeling krijgt. Op alle overige behandeldagen ontvangt u alleen factor VIII-concentraat.

#### DDAVP

DDAVP krijgt u in de standaarddosering via een infuus. Om er zeker van te zijn dat dit middel bij u werkt, hebben we de resultaten van een DDAVP-test nodig. Dit kunnen resultaten zijn van een test die eerder is uitgevoerd. Indien er voor een geplande operatie geen testresultaten beschikbaar zijn of zijn ze niet geschikt, dan zal uw arts met u een nieuwe test afspreken voorafgaand aan de operatie. Tijdens de test zal u 1 dosis DDAVP toegediend krijgen via een infuus. Zowel voor als 2-3 keer na de toediening van DDAVP zal er bloed worden afgenomen om uw reactie op DDAVP te meten. Meer uitleg over de gang van zaken tijdens de test ontvangt u van uw eigen arts.

Hierboven heeft u kunnen lezen dat u maximaal 3 aaneengesloten dagen DDAVP krijgt. Dit doen we, omdat de voorraad van factor VIII na meerdere DDAVP-toedieningen minder wordt. Daarom is het belangrijk dat uw lichaam na 3 aaneengesloten dagen, 3 dagen 'rust' krijgt, waarin u geen DDAVP krijgt. Na 3 'rust'-dagen kunt u weer DDAVP ontvangen.

#### Factor VIII-concentraten

Gedurende het onderzoek krijgt u hetzelfde factor VIII-concentraat (bijvoorbeeld Novoeight of Kogenate) dat u anders ook zou krijgen. Op basis van de resultaten van de DDAVP-test en de gemeten factor VIII-waarden wordt er rondom de operatie of bloeding dagelijks een persoonlijke dosering bepaald en doorgegeven aan uw eigen arts. Uw eigen arts beslist hoe lang u factor VIII-concentraat toegediend krijgt en of het factor VIII-concentraat continu of in losse giften per dag gegeven wordt.

#### Vragenlijst

U krijgt voor de start van de combinatiebehandeling en 3 dagen erna een korte vragenlijst met 14 vragen over hoe u de zorg rondom de operatie of bloeding hebt ervaren. Deze vragenlijst richt zich op de behandeling van uw hemofilie A.

### 4. Wat wordt er van u verwacht?

Tijdens het onderzoek vragen wij u de voorschriften van uw arts te volgen. Dit houdt onder andere in dat u gedurende de behandeling met DDAVP niet meer vocht binnenkrijgt dan 1,5 liter per dag. Verder is er een extra ziekenhuisbezoek nodig, indien u een DDAVP-test nodig hebt. Dit hoort u van uw eigen arts.

### 5. Wat is er meer of anders dan de reguliere behandeling?

De reguliere behandeling rondom operaties en bloedingen bij patiënten met hemofilie A bestaat uit het geven van factor VIII-concentraat. Tijdens het onderzoek krijgt u daarnaast DDAVP. U ontvangt de combinatiebehandeling maximaal twee perioden van 3 aaneengesloten dagen. Tussen deze twee

1  
2  
3 perioden, zitten 3 dagen zonder DDAVP. Indien nodig krijgt u voor een geplande operatie een DDAVP-  
4 test om te zien hoe u op deze medicatie reageert.

5 Daarnaast wordt onderzocht of u voldoende reageert op de combinatiebehandeling en of u de juiste  
6 dosering krijgt. Hiervoor nemen we tijdens de combinatiebehandeling, afhankelijk van de dag, 1-2 keer  
7 per dag vaker bloed af, 15 milliliter per keer. Zie hiervoor bijlage 2.

8 Verder onderzoeken we of veranderingen of verschillen in het DNA mogelijk samenhangen met de  
9 manier waarop u op de behandeling reageert. Hiervoor wordt eenmalig bloed afgenomen. Dit gebeurt  
10 alleen als u hiervoor toestemming geeft.

11 In bijlage 2 vindt u een schematisch overzicht van de onderzoeken. Hierop staat aangegeven welke  
12 behandelingen en onderzoeken extra zijn ten opzichte van de reguliere behandeling.  
13  
14

### 15 **6. Wat zijn de mogelijke andere behandelingen?**

16 Wanneer u besluit niet deel te nemen aan het onderzoek, wordt u behandeld met factor VIII-  
17 concentraat in de standaarddosering.  
18  
19

### 20 **7. Welke bijwerkingen kunt u verwachten?**

21 Bijwerkingen van DDAVP zijn van voorbijgaande aard en over het algemeen mild. De meest  
22 voorkomende bijwerkingen zijn een tijdelijke daling van de bloeddruk, een stijging van de hartslag,  
23 blozen, hoofdpijn en jeukende ogen. In zeldzame gevallen houdt het lichaam te veel vocht vast,  
24 waardoor het zoutgehalte in het bloed te laag kan worden.

25 De belangrijkste bijwerking van factor VIII-concentraten is een verhoogd risico op het ontwikkelen van  
26 remmers tegen factor VIII. Remmers zijn stoffen waardoor mogelijk de werkzaamheid van factor VIII-  
27 concentraten bij u in het vervolg verminderd kan zijn.  
28  
29

30 Niet alle bijwerkingen die bekend zijn, worden hier vermeld. Het is ook niet zo dat alle genoemde  
31 bijwerkingen bij elke patiënt zullen optreden. Wanneer u klachten krijgt, vragen wij u dit altijd aan uw  
32 eigen arts te melden.  
33  
34

### 35 **8. Wat zijn de mogelijke voor- en nadelen van deelname?**

36 Aan deelname zijn voor u geen directe voordelen verbonden. Met uw deelname kunt u wel de  
37 behandeling van milde en matige hemofilie A-patiënten helpen verbeteren.

38 Waarschijnlijk heeft u minder factor VIII-concentraat nodig dan u buiten de studie nodig zou hebben,  
39 omdat u ook DDAVP zal krijgen. Mogelijk kan dit het risico op het ontwikkelen van remmers tegen  
40 factor VIII verminderen. De ontwikkeling van remmers zorgt ervoor dat de behandeling met FVIII-  
41 concentraat minder effectief zal worden.

42 Het nadeel van deelname is dat er ten opzichte van de reguliere behandeling dagelijks 1 tot 2 extra  
43 bloedafnames plaatsvinden gedurende de ziekenhuisopname. Daarnaast moet u een DDAVP-test  
44 ondergaan als er geen geschikte eerdere resultaten beschikbaar zijn. Deze resultaten kunnen ook buiten  
45 de studie van nut zijn voor uw behandeling. Tot slot kunt u mogelijk bijwerkingen krijgen van de DDAVP.  
46  
47

### 48 **9. Wat gebeurt er als u niet wenst deel te nemen aan het onderzoek?**

49 Het is uw beslissing om wel of niet aan deze studie deel te nemen. U kunt besluiten om niet deel te  
50 nemen of uw toestemming tot deelname aan de studie op elk moment intrekken, zonder dat dit de zorg  
51 die u van artsen of verpleging in het ziekenhuis krijgt, beïnvloedt.  
52  
53

### 54 **10. Wat gebeurt er als het onderzoek is afgelopen?**

55 Het kan voorkomen dat u of uw behandelend arts besluit uw deelname aan het onderzoek te stoppen. U  
56 kunt dat zonder opgave van redenen en op ieder moment beslissen. U zal dan overgaan op de reguliere  
57  
58  
59  
60

1  
2  
3 behandeling die bestaat uit het toedienen van uitsluitend factor VIII-concentraat. Uw behandelend arts  
4 zal uw deelname aan het onderzoek alleen stoppen als dat noodzakelijk wordt geacht, bijvoorbeeld  
5 vanwege uw gezondheid.  
6

### 7 **11. Bent u verzekerd wanneer u aan het onderzoek meedoet?**

8 Voor iedereen die aan dit onderzoek deelneemt, is een verzekering afgesloten. De verzekering dekt de  
9 schade als gevolg van het onderzoek. Dit geldt voor schade die tijdens het onderzoek optreedt. In bijlage  
10 3 vindt u de verzekeringsgegevens.  
11  
12

### 13 **12. Wordt u geïnformeerd als er tussentijds voor u relevante informatie over de studie bekend 14 wordt?**

15 Het onderzoek zal zo nauwkeurig mogelijk volgens plan verlopen. De situatie kan echter veranderen,  
16 bijvoorbeeld doordat er nieuwe informatie wordt verkregen. In dat geval wordt dat met u besproken. U  
17 beslist dan zelf of u met het onderzoek wilt stoppen of doorgaan. Als uw veiligheid of welbevinden in  
18 gevaar is, stoppen we direct met het onderzoek.  
19  
20

### 21 **13. Wat gebeurt er met uw gegevens en lichaamsmateriaal?**

22 In de algemene brochure is uitgelegd dat de onderzoeker gegevens over u verzamelt en deze  
23 vertrouwelijk behandelt. Dit betekent dat een aantal personen uw medische status en de gegevens van  
24 het onderzoek mogen inzien. Deze personen mogen de gegevens gebruiken voor dit onderzoek, maar zij  
25 mogen deze gegevens alleen bekend maken zonder daarbij uw naam of andere persoonlijke gegevens te  
26 vermelden. Uw identiteit blijft dus altijd geheim. De onderzoeker bewaart de gegevens met een code.  
27 Dit betekent dat op de studie- documenten in plaats van uw naam alleen een letter-cijfercode staat.  
28 Alleen de onderzoeker houdt een lijst bij waarop staat welke letter- cijfercode bij welke naam hoort.  
29  
30

31 Normaal gesproken heeft alleen uw behandelend arts en zijn/ haar team inzage in uw gegevens. Als u  
32 meedoet aan deze studie krijgen meer mensen inzage in uw medische gegevens en studiegegevens. De  
33 personen die inzage kunnen krijgen in uw gegevens zijn:

- 34 - de medewerkers van het onderzoeksteam,
- 35 - de leden van de toetsingscommissie die de studie heeft goedgekeurd,
- 36 - de bevoegde medewerkers van de Inspectie voor de Gezondheidszorg  
37

38  
39 Na de studie worden de gecodeerde gegevens gedurende 15 jaar bewaard. Dit is nodig om alles goed te  
40 kunnen controleren. Bovendien willen wij graag uw gegevens gebruiken voor andere onderzoeken die  
41 worden uitgevoerd naar milde en matige hemofilie A.

42 Deze onderzoeken hebben dus eenzelfde doel als het onderzoek waarvoor u nu wordt gevraagd. Het is  
43 dus niet zo dat uw gegevens ook zullen worden gebruikt voor onderzoek naar een geheel andere  
44 aandoening of een heel ander probleem. Vanzelfsprekend blijft de vertrouwelijkheid die we hierboven  
45 hebben beschreven altijd gelden. Vindt u het goed als wij uw gegevens gebruiken? Als u dat niet wilt,  
46 respecteren wij dat natuurlijk. U kunt uw keuze op het toestemmingsformulier aangeven.  
47

48 Na de studie wordt uw lichaamsmateriaal (bloedmonsters en eventueel DNA) in gecodeerde vorm  
49 gedurende 15 jaar bewaard. Na een tijdelijke opslag in uw eigen ziekenhuis, zal het materiaal worden  
50 opgeslagen in het Erasmus Universitair Medisch Centrum Rotterdam. Wij willen dit materiaal graag  
51 gebruiken voor andere onderzoeken die worden uitgevoerd naar milde en matige hemofilie A. Deze  
52 onderzoeken hebben dus eenzelfde doel als het onderzoek waarvoor u nu wordt gevraagd. Het is dus  
53 niet zo dat uw materiaal ook zal worden gebruikt voor onderzoek naar een geheel andere aandoening of  
54 een heel ander probleem. Vanzelfsprekend blijft de vertrouwelijkheid die we hierboven hebben  
55  
56  
57  
58  
59  
60

1  
2  
3 beschreven altijd gelden. Vindt u het goed als wij uw materiaal bewaren en gebruiken? Als u dat niet  
4 wilt, respecteren wij dat natuurlijk. U kunt uw keuze op het toestemmingsformulier aangeven.  
5

6  
7 **14. Wordt uw huisarts en/of behandelend specialist geïnformeerd bij deelname?**

8 Wij laten uw huisarts schriftelijk weten dat u meedoet aan het onderzoek. Dit is voor uw eigen  
9 veiligheid. U moet hiervoor toestemming geven op het toestemmingsformulier. Als u geen toestemming  
10 geeft, kan u niet meedoen aan het onderzoek.  
11

12 **15. Krijgt u een vergoeding voor deelname?**

13 Indien u voorafgaand aan de deelname aan de studie nog geen DDAVP-test gehad en u hiervoor een  
14 extra keer naar het hemofiliebehandelcentrum moet komen, dan krijgt u een vergoeding voor de reis-  
15 en eventuele parkeerkosten. Verder is er aan deelname aan de studie geen vergoeding verbonden.  
16

17 **16. Welke medisch-ethische toetsingscommissie heeft dit onderzoek goedgekeurd?**

18 Toetsingscommissie METC Erasmus MC heeft dit onderzoek goedgekeurd. Meer informatie over de  
19 goedkeuring vindt u in de algemene brochure.  
20  
21

22 **17. Waar kunt u met vragen over het onderzoek terecht?**

23 Met vragen over het onderzoek kunt u terecht bij uw hemofiliebehandelcentrum. In bijlage 1 vindt u de  
24 contactgegevens. Tevens vindt u daar de gegevens van een onafhankelijk arts aan wie u ook vragen kunt  
25 stellen over deelname aan het onderzoek.  
26

27 Als u niet tevreden bent over het onderzoek of de behandeling, kunt u een klacht indienen bij de  
28 klachtencommissie. In bijlage 1 vindt u de benodigde contactgegevens.  
29

30 Indien u na zorgvuldige overweging besluit deel te nemen aan dit wetenschappelijk onderzoek, dan  
31 vragen we u om samen met de onderzoeker het toestemmingsformulier te ondertekenen en te dateren.  
32

33 Met vriendelijke groet,

34  
35 Namens het onderzoeksteam,

36  
37 Dr. Marieke J.H.A. Kruij en drs. Lisette M. Schütte  
38  
39  
40  
41  
42  
43  
44  
45  
46  
47  
48  
49  
50  
51  
52  
53  
54  
55  
56  
57  
58  
59  
60

## Bijlagen

1. Contactgegevens
2. Schema met onderzoeken
3. Informatie over de verzekering
4. Toestemmingsverklaring
5. Algemene brochure medisch-wetenschappelijk onderzoek met mensen

### Bijlage 1 – contactgegevens

U kunt meer informatie over het onderzoek krijgen bij de onderzoeker of bij één van uw behandelaren:

Hematologen:

<Namen >

Verpleegkundig specialist hemofilie:

<Namen >

Hemofilieverpleegkundigen:

<Namen >

Contactgegevens:

Hemofiliebehandelcentrum <naam zh>:

<adres HBC>

e-mail: <emailadres HBC >

[david@erasmusmc.nl](mailto:david@erasmusmc.nl)

Secretariaat hematologie: <tel>

Onderzoekers:

Dr. Marieke J.H.A. Kruij

Drs. L.M. Schütte

#### Onafhankelijk deskundige

Als u twijfelt over deelname aan dit onderzoek, kunt u ook een onafhankelijk arts raadplegen, die zelf niet bij het onderzoek is betrokken, maar wel deskundig is op dit gebied:

Dr. P.A.W. te Boekhorst, internist-hematoloog, tel: 010-7033123

Ook als u vragen voor of tijdens het onderzoek hebt, die u liever niet aan de onderzoekers stelt, kunt u contact opnemen met de onafhankelijke arts.

#### Klachten

Een klacht kunt u indienen bij

<Onafhankelijke klachtencommissie of andere procedure>

### Bijlage 2 – Schema met onderzoeken; zodra de behandeling is afgerond, zijn bloedafnames niet meer nodig

In het geval van een geplande ingreep

| Onderzoek    | Screening        | Opnameperiode       |                      |                                   |                                     |                                     | Vervolg periode        |
|--------------|------------------|---------------------|----------------------|-----------------------------------|-------------------------------------|-------------------------------------|------------------------|
|              | Voor de operatie | Dag van de operatie | Dag 1 na de operatie | Dag 2 na de operatie indien nodig | Dag 3-5 na de operatie indien nodig | Dag 6-8 na de operatie indien nodig | 8-10 weken na operatie |
| DNA-afname*  | V                |                     |                      |                                   |                                     |                                     |                        |
| DDAVP-test*  | V                |                     |                      |                                   |                                     |                                     |                        |
| Bloedonderzo | V                | X-V-X-X             | X-V-V                | X-V-V                             | X                                   | X-V-V                               |                        |

|                                               |   |   |   |   |   |   |   |
|-----------------------------------------------|---|---|---|---|---|---|---|
| ek**/***                                      |   |   |   |   |   |   |   |
| DDAVP-toediening**                            |   | V | V | V |   | V |   |
| factor VIII-concentraat volgens doseeradvies* |   | X | X | X | X | X |   |
| Vragenlijst                                   | V |   |   |   | V |   |   |
| Bloedonderzoek remmers                        |   |   |   |   |   |   | X |

\*alleen indien nodig; zie eerdere informatie in de brief

\*\*alleen indien behandeling nog noodzakelijk is; dit hoort u van uw eigen arts

\*\*\*hier zijn alle bloedafnames genoemd, ook de standaard afnames buiten de studie.

X: Deze onderzoeken en behandelingen zijn standaard.

V: Deze onderzoeken en behandelingen zijn extra voor de studie.

In het geval van een spoedingreep of een bloeding

| Onderzoek                                      | Opnameperiode       |                      |                                   |                                     |                                     | Vervolg periode |
|------------------------------------------------|---------------------|----------------------|-----------------------------------|-------------------------------------|-------------------------------------|-----------------|
|                                                | Dag van start DDAVP | Dag 1 na start DDAVP | Dag 2 na start DDAVP indien nodig | Dag 3-5 na start DDAVP indien nodig | Dag 6-8 na start DDAVP indien nodig |                 |
| DNA-afname*                                    | V                   |                      |                                   |                                     |                                     |                 |
| Bloedonderzoek ek**/***                        | X-V-X-X             | X-V-V                | X-V-V                             | X                                   | X-V-V                               |                 |
| DDAVP-toediening**                             | X                   | X                    | X                                 |                                     | X                                   |                 |
| factor VIII-concentraten volgens doseeradvies* | X                   | X                    | X                                 | X                                   | X                                   |                 |
| Vragenlijst                                    | V                   |                      |                                   | V                                   |                                     |                 |
| Bloedonderzoek remmers                         | V                   |                      |                                   |                                     |                                     | X               |

\*alleen indien nodig; zie eerdere informatie in de brief

\*\* alleen indien behandeling nog noodzakelijk is; dit hoort diegene die u vertegenwoordigt, van zijn eigen arts

\*\*\* hier zijn alle bloedonderzoeken genoemd, ook de bloedonderzoeken die behoren tot de standaardzorg.

X: Deze onderzoeken en behandelingen zijn standaard.

V: Deze onderzoeken en behandelingen zijn extra voor de studie

### Bijlage 3 – Informatie over de verzekering

Voor iedereen die meedoet aan dit onderzoek, heeft het Erasmus MC een verzekering afgesloten. De verzekering dekt schade door deelname aan het onderzoek. Dit geldt voor schade tijdens het onderzoek of binnen vier jaar na het einde ervan. Schade moet u binnen die vier jaar aan de verzekeraar hebben gemeld.

De verzekering dekt niet alle schade. Onderaan deze tekst staat in het kort welke schade niet wordt gedekt.

Deze bepalingen staan in het Besluit verplichte verzekering bij medisch-wetenschappelijk onderzoek met mensen. Dit besluit staat op [www.ccmo.nl](http://www.ccmo.nl), de website van de Centrale Commissie Mensgebonden Onderzoek (zie 'Bibliotheek' en dan 'Wet- en regelgeving').

Bij schade kunt u direct contact leggen met:

*Van Ameyde  
Ter attentie van mw. K. Roberts  
Postbus 3038  
2280 GA Rijswijk  
T +31 (0) 70 413 7300  
[marketform@vanameyde.com](mailto:marketform@vanameyde.com)*

De verzekering biedt een dekking van € 650.000 per proefpersoon en € 5.000.000 voor het hele onderzoek (en € 7.500.000 per jaar voor alle onderzoeken van dezelfde opdrachtgever).

De verzekering dekt de volgende schade niet:

- schade door een risico waarover u in de schriftelijke informatie bent ingelicht. Dit geldt niet als het risico zich ernstiger voordoet dan was voorzien of als het risico heel onwaarschijnlijk was;
- schade aan uw gezondheid die ook zou zijn ontstaan als u niet aan het onderzoek had meegedaan;
- schade door het niet (volledig) opvolgen van aanwijzingen of instructies;
- schade aan uw nakomelingen, als gevolg van een negatief effect van het onderzoek op u of uw nakomelingen;
- schade door een bestaande behandelmethode bij onderzoek naar bestaande behandelmethoden.

1  
2  
3 **Betreft: DAVID-studie**  
4

5 **Toestemmingsformulier voor volwassen deelnemers**  
6

7 Naam: .....

8 Geboortedatum: \_\_/\_\_/\_\_

9 Ik bevestig dat ik de informatiebrief voor deelnemers heb gelezen. Ik begrijp de informatie. Ik heb de gelegenheid  
10 gehad om aanvullende vragen te stellen. Deze vragen zijn naar tevredenheid beantwoord. Ik heb voldoende tijd  
11 gehad om over deelname na te denken.  
12

13 Ik weet dat mijn deelname geheel vrijwillig is en dat ik mijn toestemming op ieder moment kan intrekken, zonder  
14 dat ik daarvoor een reden hoeft te geven.  
15

16 Ik geef toestemming voor deelname aan bovengenoemd onderzoek.  
17

18 Ik geef toestemming om mijn huisarts te vertellen dat ik meedoe aan dit onderzoek.  
19

20 Ik geef toestemming aan bevoegde personen van het onderzoeksteam, medewerkers van de Inspectie voor de  
21 Gezondheidszorg en leden van de medisch-ethische toetsingscommissie voor inzage in mijn medische gegevens en  
22 onderzoeksgegevens.  
23

24 Ik geef toestemming om de gegevens te verwerken voor de doeleinden zoals beschreven in de informatiebrief.  
25

26 Ik geef toestemming voor het bewaren van de onderzoeksgegevens na afloop van het onderzoek voor een periode  
27 van 15 jaar.  
28

29 Ik geef toestemming om mijn huisarts in te lichten over deelname aan dit onderzoek.  
30

31 U wordt gevraagd in onderstaande zinnen door te halen wat niet van toepassing is.  
32

33 Ik geef **WEL/GEEN** toestemming om de onderzoeksgegevens te gebruiken voor toekomstig onderzoek.  
34

35 Ik geef **WEL/GEEN** toestemming om lichaamsmateriaal te gebruiken voor toekomstig onderzoek en te bewaren  
36 voor een periode van maximaal 15 jaar.  
37

38 Ik geef **WEL/GEEN** toestemming om DNA-materiaal te gebruiken voor toekomstig onderzoek en te bewaren voor  
39 een periode van maximaal 15 jaar.  
40

41 Ik wil meedoen aan dit onderzoek.  
42

43 Naam deelnemer :

44 Handtekening :

45 Datum : \_\_/\_\_/\_\_

46 Hierbij verklaar ik, de onderzoeker, dat ik de deelnemer in de gelegenheid heb gesteld om aanvullende vragen te  
47 stellen, welke ik alle naar waarheid heb beantwoord.  
48

49 Alle gegevens die mij inzake het onderzoek ter inzage zullen komen, zal ik geheimhouden en met respect  
50 behandelen.  
51

52 Naam onderzoeker (of diens vertegenwoordiger) :

53 Handtekening :

54 Datum : \_\_/\_\_/\_\_  
55  
56  
57  
58  
59  
60



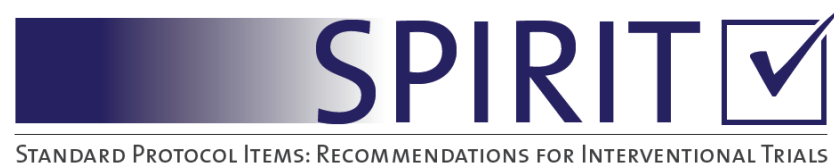

SPIRIT 2013 Checklist: Recommended items to address in a clinical trial protocol and related documents\*

| Section/item                      | Item No | Description                                                                                                                                                                                                                                                                              | Addressed on page number       |
|-----------------------------------|---------|------------------------------------------------------------------------------------------------------------------------------------------------------------------------------------------------------------------------------------------------------------------------------------------|--------------------------------|
| <b>Administrative information</b> |         |                                                                                                                                                                                                                                                                                          |                                |
| Title                             | 1       | Descriptive title identifying the study design, population, interventions, and, if applicable, trial acronym                                                                                                                                                                             | 1_____                         |
| Trial registration                | 2a      | Trial identifier and registry name. If not yet registered, name of intended registry                                                                                                                                                                                                     | 2_ & 13_____                   |
|                                   | 2b      | All items from the World Health Organization Trial Registration Data Set                                                                                                                                                                                                                 | Manuscript+ supplementary data |
| Protocol version                  | 3       | Date and version identifier                                                                                                                                                                                                                                                              | NA_____                        |
| Funding                           | 4       | Sources and types of financial, material, and other support                                                                                                                                                                                                                              | 14_____                        |
| Roles and responsibilities        | 5a      | Names, affiliations, and roles of protocol contributors                                                                                                                                                                                                                                  | _1 & 14                        |
|                                   | 5b      | Name and contact information for the trial sponsor                                                                                                                                                                                                                                       | 1                              |
|                                   | 5c      | Role of study sponsor and funders, if any, in study design; collection, management, analysis, and interpretation of data; writing of the report; and the decision to submit the report for publication, including whether they will have ultimate authority over any of these activities | 14                             |
|                                   | 5d      | Composition, roles, and responsibilities of the coordinating centre, steering committee, endpoint adjudication committee, data management team, and other individuals or groups overseeing the trial, if applicable (see Item 21a for data monitoring committee)                         | supplementary data 1+2         |

**Introduction**

|    |                                                           |     |                                                                                                               |         |
|----|-----------------------------------------------------------|-----|---------------------------------------------------------------------------------------------------------------|---------|
| 1  | Background and                                            | 6a  | Description of research question and justification for undertaking the trial, including summary of relevant   | 4 & 5   |
| 2  | rationale                                                 |     | studies (published and unpublished) examining benefits and harms for each intervention                        |         |
| 3  |                                                           |     |                                                                                                               |         |
| 4  |                                                           | 6b  | Explanation for choice of comparators                                                                         | NA      |
| 5  |                                                           |     |                                                                                                               |         |
| 6  | Objectives                                                | 7   | Specific objectives or hypotheses                                                                             | 5       |
| 7  |                                                           |     |                                                                                                               |         |
| 8  | Trial design                                              | 8   | Description of trial design including type of trial (eg, parallel group, crossover, factorial, single group), |         |
| 9  |                                                           |     | allocation ratio, and framework (eg, superiority, equivalence, noninferiority, exploratory)                   | 6       |
| 10 |                                                           |     |                                                                                                               |         |
| 11 |                                                           |     |                                                                                                               |         |
| 12 | <b>Methods: Participants, interventions, and outcomes</b> |     |                                                                                                               |         |
| 13 |                                                           |     |                                                                                                               |         |
| 14 | Study setting                                             | 9   | Description of study settings (eg, community clinic, academic hospital) and list of countries where data will | 6       |
| 15 |                                                           |     | be collected. Reference to where list of study sites can be obtained                                          |         |
| 16 |                                                           |     |                                                                                                               |         |
| 17 | Eligibility criteria                                      | 10  | Inclusion and exclusion criteria for participants. If applicable, eligibility criteria for study centres and  | 6       |
| 18 |                                                           |     | individuals who will perform the interventions (eg, surgeons, psychotherapists)                               |         |
| 19 |                                                           |     |                                                                                                               |         |
| 20 | Interventions                                             | 11a | Interventions for each group with sufficient detail to allow replication, including how and when they will be | 7       |
| 21 |                                                           |     | administered                                                                                                  |         |
| 22 |                                                           |     |                                                                                                               |         |
| 23 |                                                           | 11b | Criteria for discontinuing or modifying allocated interventions for a given trial participant (eg, drug dose  | NA      |
| 24 |                                                           |     | change in response to harms, participant request, or improving/worsening disease)                             |         |
| 25 |                                                           |     |                                                                                                               |         |
| 26 |                                                           | 11c | Strategies to improve adherence to intervention protocols, and any procedures for monitoring adherence        | 7       |
| 27 |                                                           |     | (eg, drug tablet return, laboratory tests)                                                                    |         |
| 28 |                                                           |     |                                                                                                               |         |
| 29 |                                                           | 11d | Relevant concomitant care and interventions that are permitted or prohibited during the trial                 | 7       |
| 30 |                                                           |     |                                                                                                               |         |
| 31 | Outcomes                                                  | 12  | Primary, secondary, and other outcomes, including the specific measurement variable (eg, systolic blood       |         |
| 32 |                                                           |     | pressure), analysis metric (eg, change from baseline, final value, time to event), method of aggregation (eg, | 9+10    |
| 33 |                                                           |     | median, proportion), and time point for each outcome. Explanation of the clinical relevance of chosen         |         |
| 34 |                                                           |     | efficacy and harm outcomes is strongly recommended                                                            |         |
| 35 |                                                           |     |                                                                                                               |         |
| 36 |                                                           |     |                                                                                                               |         |
| 37 | Participant timeline                                      | 13  | Time schedule of enrolment, interventions (including any run-ins and washouts), assessments, and visits for   | Table 2 |
| 38 |                                                           |     | participants. A schematic diagram is highly recommended (see Figure)                                          |         |
| 39 |                                                           |     |                                                                                                               |         |
| 40 |                                                           |     |                                                                                                               |         |
| 41 |                                                           |     |                                                                                                               |         |
| 42 |                                                           |     |                                                                                                               |         |
| 43 |                                                           |     |                                                                                                               |         |
| 44 |                                                           |     |                                                                                                               |         |
| 45 |                                                           |     |                                                                                                               |         |
| 46 |                                                           |     |                                                                                                               |         |

|   |             |    |                                                                                                                                                                                       |   |
|---|-------------|----|---------------------------------------------------------------------------------------------------------------------------------------------------------------------------------------|---|
| 1 | Sample size | 14 | Estimated number of participants needed to achieve study objectives and how it was determined, including clinical and statistical assumptions supporting any sample size calculations | 9 |
| 2 |             |    |                                                                                                                                                                                       |   |
| 3 |             |    |                                                                                                                                                                                       |   |
| 4 | Recruitment | 15 | Strategies for achieving adequate participant enrolment to reach target sample size                                                                                                   | 9 |
| 5 |             |    |                                                                                                                                                                                       |   |

### 6 **Methods: Assignment of interventions (for controlled trials)**

#### 7 Allocation:

|    |                    |     |                                                                                                                                                                                                                                                                                                                                                          |    |
|----|--------------------|-----|----------------------------------------------------------------------------------------------------------------------------------------------------------------------------------------------------------------------------------------------------------------------------------------------------------------------------------------------------------|----|
| 8  |                    |     |                                                                                                                                                                                                                                                                                                                                                          |    |
| 9  |                    |     |                                                                                                                                                                                                                                                                                                                                                          |    |
| 10 | Sequence           | 16a | Method of generating the allocation sequence (eg, computer-generated random numbers), and list of any factors for stratification. To reduce predictability of a random sequence, details of any planned restriction (eg, blocking) should be provided in a separate document that is unavailable to those who enrol participants or assign interventions | NA |
| 11 | generation         |     |                                                                                                                                                                                                                                                                                                                                                          |    |
| 12 |                    |     |                                                                                                                                                                                                                                                                                                                                                          |    |
| 13 |                    |     |                                                                                                                                                                                                                                                                                                                                                          |    |
| 14 |                    |     |                                                                                                                                                                                                                                                                                                                                                          |    |
| 15 |                    |     |                                                                                                                                                                                                                                                                                                                                                          |    |
| 16 | Allocation         | 16b | Mechanism of implementing the allocation sequence (eg, central telephone; sequentially numbered, opaque, sealed envelopes), describing any steps to conceal the sequence until interventions are assigned                                                                                                                                                | NA |
| 17 | concealment        |     |                                                                                                                                                                                                                                                                                                                                                          |    |
| 18 | mechanism          |     |                                                                                                                                                                                                                                                                                                                                                          |    |
| 19 |                    |     |                                                                                                                                                                                                                                                                                                                                                          |    |
| 20 | Implementation     | 16c | Who will generate the allocation sequence, who will enrol participants, and who will assign participants to interventions                                                                                                                                                                                                                                | NA |
| 21 |                    |     |                                                                                                                                                                                                                                                                                                                                                          |    |
| 22 |                    |     |                                                                                                                                                                                                                                                                                                                                                          |    |
| 23 |                    |     |                                                                                                                                                                                                                                                                                                                                                          |    |
| 24 | Blinding (masking) | 17a | Who will be blinded after assignment to interventions (eg, trial participants, care providers, outcome assessors, data analysts), and how                                                                                                                                                                                                                | NA |
| 25 |                    |     |                                                                                                                                                                                                                                                                                                                                                          |    |
| 26 |                    |     |                                                                                                                                                                                                                                                                                                                                                          |    |
| 27 |                    | 17b | If blinded, circumstances under which unblinding is permissible, and procedure for revealing a participant's allocated intervention during the trial                                                                                                                                                                                                     | NA |
| 28 |                    |     |                                                                                                                                                                                                                                                                                                                                                          |    |
| 29 |                    |     |                                                                                                                                                                                                                                                                                                                                                          |    |
| 30 |                    |     |                                                                                                                                                                                                                                                                                                                                                          |    |

### 31 **Methods: Data collection, management, and analysis**

|    |                 |     |                                                                                                                                                                                                                                                                                                                                                                                                              |       |
|----|-----------------|-----|--------------------------------------------------------------------------------------------------------------------------------------------------------------------------------------------------------------------------------------------------------------------------------------------------------------------------------------------------------------------------------------------------------------|-------|
| 32 |                 |     |                                                                                                                                                                                                                                                                                                                                                                                                              |       |
| 33 | Data collection | 18a | Plans for assessment and collection of outcome, baseline, and other trial data, including any related processes to promote data quality (eg, duplicate measurements, training of assessors) and a description of study instruments (eg, questionnaires, laboratory tests) along with their reliability and validity, if known. Reference to where data collection forms can be found, if not in the protocol | 8-10  |
| 34 | methods         |     |                                                                                                                                                                                                                                                                                                                                                                                                              |       |
| 35 |                 |     |                                                                                                                                                                                                                                                                                                                                                                                                              |       |
| 36 |                 |     |                                                                                                                                                                                                                                                                                                                                                                                                              |       |
| 37 |                 |     |                                                                                                                                                                                                                                                                                                                                                                                                              |       |
| 38 |                 | 18b | Plans to promote participant retention and complete follow-up, including list of any outcome data to be collected for participants who discontinue or deviate from intervention protocols                                                                                                                                                                                                                    | 10-11 |
| 39 |                 |     |                                                                                                                                                                                                                                                                                                                                                                                                              |       |
| 40 |                 |     |                                                                                                                                                                                                                                                                                                                                                                                                              |       |
| 41 |                 |     |                                                                                                                                                                                                                                                                                                                                                                                                              |       |
| 42 |                 |     |                                                                                                                                                                                                                                                                                                                                                                                                              |       |

|    |                                 |     |                                                                                                                                                                                                                                                                                                                                       |                      |
|----|---------------------------------|-----|---------------------------------------------------------------------------------------------------------------------------------------------------------------------------------------------------------------------------------------------------------------------------------------------------------------------------------------|----------------------|
| 1  | Data management                 | 19  | Plans for data entry, coding, security, and storage, including any related processes to promote data quality (eg, double data entry; range checks for data values). Reference to where details of data management procedures can be found, if not in the protocol                                                                     | Supplementary data 3 |
| 2  |                                 |     |                                                                                                                                                                                                                                                                                                                                       |                      |
| 3  |                                 |     |                                                                                                                                                                                                                                                                                                                                       |                      |
| 4  |                                 |     |                                                                                                                                                                                                                                                                                                                                       |                      |
| 5  | Statistical methods             | 20a | Statistical methods for analysing primary and secondary outcomes. Reference to where other details of the statistical analysis plan can be found, if not in the protocol                                                                                                                                                              | 10                   |
| 6  |                                 |     |                                                                                                                                                                                                                                                                                                                                       |                      |
| 7  |                                 |     |                                                                                                                                                                                                                                                                                                                                       |                      |
| 8  |                                 | 20b | Methods for any additional analyses (eg, subgroup and adjusted analyses)                                                                                                                                                                                                                                                              | 10+11                |
| 9  |                                 |     |                                                                                                                                                                                                                                                                                                                                       |                      |
| 10 |                                 | 20c | Definition of analysis population relating to protocol non-adherence (eg, as randomised analysis), and any statistical methods to handle missing data (eg, multiple imputation)                                                                                                                                                       | NA                   |
| 11 |                                 |     |                                                                                                                                                                                                                                                                                                                                       |                      |
| 12 |                                 |     |                                                                                                                                                                                                                                                                                                                                       |                      |
| 13 |                                 |     |                                                                                                                                                                                                                                                                                                                                       |                      |
| 14 | <b>Methods: Monitoring</b>      |     |                                                                                                                                                                                                                                                                                                                                       |                      |
| 15 |                                 |     |                                                                                                                                                                                                                                                                                                                                       |                      |
| 16 | Data monitoring                 | 21a | Composition of data monitoring committee (DMC); summary of its role and reporting structure; statement of whether it is independent from the sponsor and competing interests; and reference to where further details about its charter can be found, if not in the protocol. Alternatively, an explanation of why a DMC is not needed | 13                   |
| 17 |                                 |     |                                                                                                                                                                                                                                                                                                                                       |                      |
| 18 |                                 |     |                                                                                                                                                                                                                                                                                                                                       |                      |
| 19 |                                 |     |                                                                                                                                                                                                                                                                                                                                       |                      |
| 20 |                                 |     |                                                                                                                                                                                                                                                                                                                                       |                      |
| 21 |                                 |     |                                                                                                                                                                                                                                                                                                                                       |                      |
| 22 |                                 | 21b | Description of any interim analyses and stopping guidelines, including who will have access to these interim results and make the final decision to terminate the trial                                                                                                                                                               | NA                   |
| 23 |                                 |     |                                                                                                                                                                                                                                                                                                                                       |                      |
| 24 |                                 |     |                                                                                                                                                                                                                                                                                                                                       |                      |
| 25 | Harms                           | 22  | Plans for collecting, assessing, reporting, and managing solicited and spontaneously reported adverse events and other unintended effects of trial interventions or trial conduct                                                                                                                                                     | 13                   |
| 26 |                                 |     |                                                                                                                                                                                                                                                                                                                                       |                      |
| 27 |                                 |     |                                                                                                                                                                                                                                                                                                                                       |                      |
| 28 | Auditing                        | 23  | Frequency and procedures for auditing trial conduct, if any, and whether the process will be independent from investigators and the sponsor                                                                                                                                                                                           | NA                   |
| 29 |                                 |     |                                                                                                                                                                                                                                                                                                                                       |                      |
| 30 |                                 |     |                                                                                                                                                                                                                                                                                                                                       |                      |
| 31 |                                 |     |                                                                                                                                                                                                                                                                                                                                       |                      |
| 32 | <b>Ethics and dissemination</b> |     |                                                                                                                                                                                                                                                                                                                                       |                      |
| 33 |                                 |     |                                                                                                                                                                                                                                                                                                                                       |                      |
| 34 | Research ethics approval        | 24  | Plans for seeking research ethics committee/institutional review board (REC/IRB) approval                                                                                                                                                                                                                                             | 12                   |
| 35 |                                 |     |                                                                                                                                                                                                                                                                                                                                       |                      |
| 36 |                                 |     |                                                                                                                                                                                                                                                                                                                                       |                      |
| 37 | Protocol amendments             | 25  | Plans for communicating important protocol modifications (eg, changes to eligibility criteria, outcomes, analyses) to relevant parties (eg, investigators, REC/IRBs, trial participants, trial registries, journals, regulators)                                                                                                      | Supplementary data 4 |
| 38 |                                 |     |                                                                                                                                                                                                                                                                                                                                       |                      |
| 39 |                                 |     |                                                                                                                                                                                                                                                                                                                                       |                      |
| 40 |                                 |     |                                                                                                                                                                                                                                                                                                                                       |                      |
| 41 |                                 |     |                                                                                                                                                                                                                                                                                                                                       |                      |
| 42 |                                 |     |                                                                                                                                                                                                                                                                                                                                       |                      |

|    |                               |     |                                                                                                                                                                                                                                                                                     |                                     |
|----|-------------------------------|-----|-------------------------------------------------------------------------------------------------------------------------------------------------------------------------------------------------------------------------------------------------------------------------------------|-------------------------------------|
| 1  | Consent or assent             | 26a | Who will obtain informed consent or assent from potential trial participants or authorised surrogates, and how (see Item 32)                                                                                                                                                        | 12                                  |
| 2  |                               |     |                                                                                                                                                                                                                                                                                     |                                     |
| 3  |                               |     |                                                                                                                                                                                                                                                                                     |                                     |
| 4  |                               | 26b | Additional consent provisions for collection and use of participant data and biological specimens in ancillary studies, if applicable                                                                                                                                               | Supplementary data 3+7 (Dutch only) |
| 5  |                               |     |                                                                                                                                                                                                                                                                                     |                                     |
| 6  |                               |     |                                                                                                                                                                                                                                                                                     |                                     |
| 7  |                               |     |                                                                                                                                                                                                                                                                                     |                                     |
| 8  | Confidentiality               | 27  | How personal information about potential and enrolled participants will be collected, shared, and maintained in order to protect confidentiality before, during, and after the trial                                                                                                | Supplementary data 3                |
| 9  |                               |     |                                                                                                                                                                                                                                                                                     |                                     |
| 10 |                               |     |                                                                                                                                                                                                                                                                                     |                                     |
| 11 | Declaration of interests      | 28  | Financial and other competing interests for principal investigators for the overall trial and each study site                                                                                                                                                                       | 14+15                               |
| 12 |                               |     |                                                                                                                                                                                                                                                                                     |                                     |
| 13 |                               |     |                                                                                                                                                                                                                                                                                     |                                     |
| 14 |                               |     |                                                                                                                                                                                                                                                                                     |                                     |
| 15 | Access to data                | 29  | Statement of who will have access to the final trial dataset, and disclosure of contractual agreements that limit such access for investigators                                                                                                                                     | Supplementary data 6                |
| 16 |                               |     |                                                                                                                                                                                                                                                                                     |                                     |
| 17 |                               |     |                                                                                                                                                                                                                                                                                     |                                     |
| 18 | Ancillary and post-trial care | 30  | Provisions, if any, for ancillary and post-trial care, and for compensation to those who suffer harm from trial participation                                                                                                                                                       | Supplementary data 5                |
| 19 |                               |     |                                                                                                                                                                                                                                                                                     |                                     |
| 20 |                               |     |                                                                                                                                                                                                                                                                                     |                                     |
| 21 | Dissemination policy          | 31a | Plans for investigators and sponsor to communicate trial results to participants, healthcare professionals, the public, and other relevant groups (eg, via publication, reporting in results databases, or other data sharing arrangements), including any publication restrictions | 12                                  |
| 22 |                               |     |                                                                                                                                                                                                                                                                                     |                                     |
| 23 |                               |     |                                                                                                                                                                                                                                                                                     |                                     |
| 24 |                               |     |                                                                                                                                                                                                                                                                                     |                                     |
| 25 |                               |     |                                                                                                                                                                                                                                                                                     |                                     |
| 26 |                               | 31b | Authorship eligibility guidelines and any intended use of professional writers                                                                                                                                                                                                      | NA                                  |
| 27 |                               |     |                                                                                                                                                                                                                                                                                     |                                     |
| 28 |                               | 31c | Plans, if any, for granting public access to the full protocol, participant-level dataset, and statistical code                                                                                                                                                                     | NA                                  |
| 29 |                               |     |                                                                                                                                                                                                                                                                                     |                                     |
| 30 | <b>Appendices</b>             |     |                                                                                                                                                                                                                                                                                     |                                     |
| 31 |                               |     |                                                                                                                                                                                                                                                                                     |                                     |
| 32 | Informed consent materials    | 32  | Model consent form and other related documentation given to participants and authorised surrogates                                                                                                                                                                                  | Supplementary data 7 (Dutch only)   |
| 33 |                               |     |                                                                                                                                                                                                                                                                                     |                                     |
| 34 |                               |     |                                                                                                                                                                                                                                                                                     |                                     |
| 35 | Biological specimens          | 33  | Plans for collection, laboratory evaluation, and storage of biological specimens for genetic or molecular analysis in the current trial and for future use in ancillary studies, if applicable                                                                                      | Supplementary data 3                |
| 36 |                               |     |                                                                                                                                                                                                                                                                                     |                                     |
| 37 |                               |     |                                                                                                                                                                                                                                                                                     |                                     |

\*It is strongly recommended that this checklist be read in conjunction with the SPIRIT 2013 Explanation & Elaboration for important clarification on the items. Amendments to the protocol should be tracked and dated. The SPIRIT checklist is copyrighted by the SPIRIT Group under the Creative Commons "[Attribution-NonCommercial-NoDerivs 3.0 Unported](https://creativecommons.org/licenses/by-nc-nd/3.0/)" license.

1  
2  
3  
4  
5  
6  
7  
8  
9  
10  
11  
12  
13  
14  
15  
16  
17  
18  
19  
20  
21  
22  
23  
24  
25  
26  
27  
28  
29  
30  
31  
32  
33  
34  
35  
36  
37  
38  
39  
40  
41  
42  
43  
44  
45  
46

For peer review only
